# Supplementary material for: Inference of Low and High-Grade Glioma Gene Regulatory Networks Delineates the Role of Rnd3 in Establishing Multiple Hallmarks of Cancer
Source: PLoS Genet. 2015 Jul 1;11(7):e1005325. doi: 10.1371/journal.pgen.1005325 (PMC4488580; doi:10.1371/journal.pgen.1005325)
Supplement: S1 Dataset — Gene lists have been split into those up-regulated or down-regulated in grade 4 glioma compared to grade 2 glioma. Significantly enriched Gene Ontology terms were selected using a 10% False Discovery Rate cut-off. (XLSX) [file pgen.1005325.s001.xlsx]

## Sheet: M1 down-regulated
Category	Term	Count	Genes	Benjamini (FDR)
GOTERM_MF_FAT	GO:0030695~GTPase regulator activity	16	ARHGEF4, ARHGDIG, BCR, ARHGEF7, MCF2, RICH2, ARHGEF9, ARHGAP12, ARHGAP22, ARHGAP5, RASGRF2, RASGRF1, SRGAP3, TNK2, NET1, KALRN	1.28123e-17
GOTERM_MF_FAT	GO:0060589~nucleoside-triphosphatase regulator activity	16	ARHGEF4, ARHGDIG, BCR, ARHGEF7, MCF2, RICH2, ARHGEF9, ARHGAP12, ARHGAP22, ARHGAP5, RASGRF2, RASGRF1, SRGAP3, TNK2, NET1, KALRN	8.93499e-18
GOTERM_MF_FAT	GO:0005089~Rho guanyl-nucleotide exchange factor activity	9	ARHGEF4, BCR, RASGRF2, ARHGEF7, RASGRF1, MCF2, ARHGEF9, NET1, KALRN	1.50069e-12
GOTERM_BP_FAT	GO:0035023~regulation of Rho protein signal transduction	9	ARHGEF4, BCR, RASGRF2, ARHGEF7, RASGRF1, MCF2, ARHGEF9, NET1, KALRN	2.31637e-11
GOTERM_MF_FAT	GO:0005088~Ras guanyl-nucleotide exchange factor activity	9	ARHGEF4, BCR, RASGRF2, ARHGEF7, RASGRF1, MCF2, ARHGEF9, NET1, KALRN	4.74198e-12
GOTERM_MF_FAT	GO:0005083~small GTPase regulator activity	11	ARHGEF4, ARHGDIG, BCR, ARHGAP5, RASGRF2, ARHGEF7, RASGRF1, MCF2, ARHGEF9, NET1, KALRN	2.28362e-11
GOTERM_MF_FAT	GO:0005085~guanyl-nucleotide exchange factor activity	9	ARHGEF4, BCR, RASGRF2, ARHGEF7, RASGRF1, MCF2, ARHGEF9, NET1, KALRN	2.7338e-10
GOTERM_BP_FAT	GO:0008624~induction of apoptosis by extracellular signals	8	ARHGEF4, RASGRF2, ARHGEF7, RASGRF1, MCF2, ARHGEF9, NET1, KALRN	3.26543e-09
GOTERM_BP_FAT	GO:0046578~regulation of Ras protein signal transduction	9	ARHGEF4, BCR, RASGRF2, ARHGEF7, RASGRF1, MCF2, ARHGEF9, NET1, KALRN	3.45774e-09
GOTERM_BP_FAT	GO:0051056~regulation of small GTPase mediated signal transduction	9	ARHGEF4, BCR, RASGRF2, ARHGEF7, RASGRF1, MCF2, ARHGEF9, NET1, KALRN	1.11232e-08
GOTERM_BP_FAT	GO:0007242~intracellular signaling cascade	13	ARHGEF4, ARHGDIG, BCR, ARHGEF7, MCF2, RND2, ARHGAP5, RASGRF2, RASGRF1, RHOBTB2, TNK2, KALRN, NET1	5.06371e-08
GOTERM_BP_FAT	GO:0007264~small GTPase mediated signal transduction	8	RND2, ARHGDIG, ARHGAP5, RASGRF2, ARHGEF7, RASGRF1, RHOBTB2, TNK2	1.20353e-06
GOTERM_BP_FAT	GO:0006917~induction of apoptosis	8	ARHGEF4, RASGRF2, ARHGEF7, RASGRF1, MCF2, ARHGEF9, NET1, KALRN	1.43415e-06
GOTERM_BP_FAT	GO:0012502~induction of programmed cell death	8	ARHGEF4, RASGRF2, ARHGEF7, RASGRF1, MCF2, ARHGEF9, NET1, KALRN	1.28201e-06
GOTERM_BP_FAT	GO:0043065~positive regulation of apoptosis	8	ARHGEF4, RASGRF2, ARHGEF7, RASGRF1, MCF2, ARHGEF9, NET1, KALRN	8.34624e-06
GOTERM_BP_FAT	GO:0043068~positive regulation of programmed cell death	8	ARHGEF4, RASGRF2, ARHGEF7, RASGRF1, MCF2, ARHGEF9, NET1, KALRN	7.87325e-06
GOTERM_BP_FAT	GO:0010942~positive regulation of cell death	8	ARHGEF4, RASGRF2, ARHGEF7, RASGRF1, MCF2, ARHGEF9, NET1, KALRN	7.38403e-06
GOTERM_MF_FAT	GO:0005096~GTPase activator activity	7	ARHGAP22, ARHGDIG, BCR, ARHGAP5, SRGAP3, RICH2, ARHGAP12	5.02065e-06
GOTERM_MF_FAT	GO:0008047~enzyme activator activity	7	ARHGAP22, ARHGDIG, BCR, ARHGAP5, SRGAP3, RICH2, ARHGAP12	5.03493e-05
GOTERM_BP_FAT	GO:0042981~regulation of apoptosis	8	ARHGEF4, RASGRF2, ARHGEF7, RASGRF1, MCF2, ARHGEF9, NET1, KALRN	0.000398245
GOTERM_BP_FAT	GO:0043067~regulation of programmed cell death	8	ARHGEF4, RASGRF2, ARHGEF7, RASGRF1, MCF2, ARHGEF9, NET1, KALRN	0.000391968
GOTERM_BP_FAT	GO:0010941~regulation of cell death	8	ARHGEF4, RASGRF2, ARHGEF7, RASGRF1, MCF2, ARHGEF9, NET1, KALRN	0.00037277
GOTERM_BP_FAT	GO:0006915~apoptosis	7	ARHGEF4, RASGRF2, RASGRF1, MCF2, ARHGEF9, NET1, KALRN	0.000668488
GOTERM_BP_FAT	GO:0012501~programmed cell death	7	ARHGEF4, RASGRF2, RASGRF1, MCF2, ARHGEF9, NET1, KALRN	0.000680899
GOTERM_BP_FAT	GO:0008219~cell death	7	ARHGEF4, RASGRF2, RASGRF1, MCF2, ARHGEF9, NET1, KALRN	0.00157946
GOTERM_BP_FAT	GO:0016265~death	7	ARHGEF4, RASGRF2, RASGRF1, MCF2, ARHGEF9, NET1, KALRN	0.00154969
GOTERM_CC_FAT	GO:0005829~cytosol	8	ARHGEF4, RASGRF2, ARHGEF7, RASGRF1, MCF2, ARHGEF9, NET1, KALRN	0.01465

## Sheet: M1 up-regulated
Category	Term	Count	Genes	Benjamini (FDR)
GOTERM_MF_FAT	GO:0030695~GTPase regulator activity	17	VAV3, IQGAP2, ARHGAP18, TRIO, MYO9B, DEPDC1, ARHGAP29, RACGAP1, ECT2, ARHGAP25, ARHGAP4, PLEKHG2, SYDE1, ARHGAP11A, DEPDC1B, ARHGDIA, ARHGDIB	4.38891e-15
GOTERM_MF_FAT	GO:0060589~nucleoside-triphosphatase regulator activity	17	VAV3, IQGAP2, ARHGAP18, TRIO, MYO9B, DEPDC1, ARHGAP29, RACGAP1, ECT2, ARHGAP25, ARHGAP4, PLEKHG2, SYDE1, ARHGAP11A, DEPDC1B, ARHGDIA, ARHGDIB	4.44089e-15
GOTERM_MF_FAT	GO:0005096~GTPase activator activity	14	VAV3, IQGAP2, ARHGAP18, MYO9B, ARHGAP29, DEPDC1, RACGAP1, ARHGAP25, ARHGAP4, SYDE1, DEPDC1B, ARHGAP11A, ARHGDIA, ARHGDIB	1.4766e-14
GOTERM_MF_FAT	GO:0008047~enzyme activator activity	14	VAV3, IQGAP2, ARHGAP18, MYO9B, ARHGAP29, DEPDC1, RACGAP1, ARHGAP25, ARHGAP4, SYDE1, DEPDC1B, ARHGAP11A, ARHGDIA, ARHGDIB	2.8777e-12
GOTERM_BP_FAT	GO:0007264~small GTPase mediated signal transduction	13	RHOJ, VAV3, IQGAP2, MYO9B, ARHGAP29, ARHGAP4, RND3, NRAS, CDC42, RAC2, RHOC, ARHGDIA, ARHGDIB	8.58291e-11
GOTERM_BP_FAT	GO:0007242~intracellular signaling cascade	18	RHOJ, VAV3, IQGAP2, MYO9B, DEPDC1, ARHGAP29, RACGAP1, ECT2, ARHGAP4, CDC42, RND3, NRAS, PRKD2, RAC2, RHOC, DEPDC1B, ARHGDIA, ARHGDIB	2.8496e-09
GOTERM_MF_FAT	GO:0005083~small GTPase regulator activity	11	ARHGAP4, PLEKHG2, VAV3, SYDE1, IQGAP2, TRIO, MYO9B, ARHGAP29, ECT2, ARHGDIA, ARHGDIB	4.93099e-09
GOTERM_BP_FAT	GO:0007010~cytoskeleton organization	11	RHOJ, KIF23, ARHGAP4, CDC42, NRAS, RND3, PRC1, RAC2, MYO9B, RACGAP1, ARHGDIB	7.94381e-07
GOTERM_BP_FAT	GO:0007266~Rho protein signal transduction	6	RHOJ, ARHGAP4, MYO9B, ARHGAP29, ARHGDIA, ARHGDIB	8.73406e-07
GOTERM_BP_FAT	GO:0007265~Ras protein signal transduction	7	RHOJ, ARHGAP4, NRAS, MYO9B, ARHGAP29, ARHGDIA, ARHGDIB	3.47685e-06
GOTERM_BP_FAT	GO:0030036~actin cytoskeleton organization	8	RHOJ, CDC42, NRAS, RND3, RAC2, MYO9B, RACGAP1, ARHGDIB	1.35663e-05
GOTERM_BP_FAT	GO:0030029~actin filament-based process	8	RHOJ, CDC42, NRAS, RND3, RAC2, MYO9B, RACGAP1, ARHGDIB	1.79674e-05
GOTERM_BP_FAT	GO:0051056~regulation of small GTPase mediated signal transduction	7	NRAS, PLEKHG2, VAV3, SYDE1, IQGAP2, TRIO, ECT2	0.000367913
KEGG_PATHWAY	hsa04810:Regulation of actin cytoskeleton	6	CDC42, NRAS, VAV3, RAC2, PAK4, IQGAP2	0.000594189
GOTERM_MF_FAT	GO:0019992~diacylglycerol binding	5	PRKD2, VAV3, MYO9B, ARHGAP29, RACGAP1	0.000226929
GOTERM_MF_FAT	GO:0005100~Rho GTPase activator activity	4	ARHGAP4, SYDE1, MYO9B, ARHGAP29	0.000495193
GOTERM_BP_FAT	GO:0035023~regulation of Rho protein signal transduction	5	PLEKHG2, VAV3, SYDE1, TRIO, ECT2	0.00150095
GOTERM_MF_FAT	GO:0005099~Ras GTPase activator activity	5	ARHGAP4, SYDE1, IQGAP2, MYO9B, ARHGAP29	0.000538259
GOTERM_BP_FAT	GO:0046578~regulation of Ras protein signal transduction	6	NRAS, PLEKHG2, VAV3, SYDE1, TRIO, ECT2	0.00176652
GOTERM_BP_FAT	GO:0008624~induction of apoptosis by extracellular signals	5	ARHGAP4, PLEKHG2, VAV3, TRIO, ECT2	0.00198862
GOTERM_MF_FAT	GO:0003924~GTPase activity	6	RHOJ, CDC42, NRAS, RND3, RAC2, RHOC	0.000983167
KEGG_PATHWAY	hsa04510:Focal adhesion	5	CDC42, VAV3, RAC2, PAK4, ZYX	0.00534956
GOTERM_MF_FAT	GO:0005085~guanyl-nucleotide exchange factor activity	5	ARHGAP4, PLEKHG2, VAV3, TRIO, ECT2	0.00311939
GOTERM_MF_FAT	GO:0005089~Rho guanyl-nucleotide exchange factor activity	4	PLEKHG2, VAV3, TRIO, ECT2	0.00468961
KEGG_PATHWAY	hsa04660:T cell receptor signaling pathway	4	CDC42, NRAS, VAV3, PAK4	0.00993778
KEGG_PATHWAY	hsa04722:Neurotrophin signaling pathway	4	CDC42, NRAS, ARHGDIA, ARHGDIB	0.0111561
GOTERM_MF_FAT	GO:0005088~Ras guanyl-nucleotide exchange factor activity	4	PLEKHG2, VAV3, TRIO, ECT2	0.0071132
KEGG_PATHWAY	hsa04360:Axon guidance	4	CDC42, NRAS, RAC2, PAK4	0.0100195
GOTERM_MF_FAT	GO:0005525~GTP binding	6	RHOJ, CDC42, NRAS, RND3, RAC2, RHOC	0.00909699
GOTERM_MF_FAT	GO:0032561~guanyl ribonucleotide binding	6	RHOJ, CDC42, NRAS, RND3, RAC2, RHOC	0.00949638
GOTERM_MF_FAT	GO:0019001~guanyl nucleotide binding	6	RHOJ, CDC42, NRAS, RND3, RAC2, RHOC	0.00949638
GOTERM_MF_FAT	GO:0032555~purine ribonucleotide binding	12	RHOJ, KIF23, CDC42, NRAS, PRKD2, RND3, RAC2, PAK4, TRIO, ACTL6A, RHOC, MYO9B	0.00954239
GOTERM_MF_FAT	GO:0032553~ribonucleotide binding	12	RHOJ, KIF23, CDC42, NRAS, PRKD2, RND3, RAC2, PAK4, TRIO, ACTL6A, RHOC, MYO9B	0.00954239
GOTERM_MF_FAT	GO:0017076~purine nucleotide binding	12	RHOJ, KIF23, CDC42, NRAS, PRKD2, RND3, RAC2, PAK4, TRIO, ACTL6A, RHOC, MYO9B	0.012785
KEGG_PATHWAY	hsa04062:Chemokine signaling pathway	4	CDC42, NRAS, VAV3, RAC2	0.0241724
GOTERM_BP_FAT	GO:0006917~induction of apoptosis	5	ARHGAP4, PLEKHG2, VAV3, TRIO, ECT2	0.0896549
GOTERM_BP_FAT	GO:0012502~induction of programmed cell death	5	ARHGAP4, PLEKHG2, VAV3, TRIO, ECT2	0.0839438
GOTERM_BP_FAT	GO:0000022~mitotic spindle elongation	2	KIF23, PRC1	0.0795385
GOTERM_BP_FAT	GO:0051231~spindle elongation	2	KIF23, PRC1	0.0795385
GOTERM_BP_FAT	GO:0042981~regulation of apoptosis	7	ARHGAP4, NRAS, PLEKHG2, VAV3, TRIO, ECT2, ARHGDIA	0.0940849
GOTERM_BP_FAT	GO:0043067~regulation of programmed cell death	7	ARHGAP4, NRAS, PLEKHG2, VAV3, TRIO, ECT2, ARHGDIA	0.0926402
GOTERM_BP_FAT	GO:0010941~regulation of cell death	7	ARHGAP4, NRAS, PLEKHG2, VAV3, TRIO, ECT2, ARHGDIA	0.0889479
KEGG_PATHWAY	hsa05211:Renal cell carcinoma	3	CDC42, NRAS, PAK4	0.0373159
GOTERM_MF_FAT	GO:0005094~Rho GDP-dissociation inhibitor activity	2	ARHGDIA, ARHGDIB	0.0321345
KEGG_PATHWAY	hsa04370:VEGF signaling pathway	3	CDC42, NRAS, RAC2	0.0373626
KEGG_PATHWAY	hsa04662:B cell receptor signaling pathway	3	NRAS, VAV3, RAC2	0.0373626
KEGG_PATHWAY	hsa04664:Fc epsilon RI signaling pathway	3	NRAS, VAV3, RAC2	0.0358785
GOTERM_MF_FAT	GO:0000166~nucleotide binding	12	RHOJ, KIF23, CDC42, NRAS, PRKD2, RND3, RAC2, PAK4, TRIO, ACTL6A, RHOC, MYO9B	0.038757
KEGG_PATHWAY	hsa04666:Fc gamma R-mediated phagocytosis	3	CDC42, VAV3, RAC2	0.0470779
GOTERM_MF_FAT	GO:0005092~GDP-dissociation inhibitor activity	2	ARHGDIA, ARHGDIB	0.0567791
KEGG_PATHWAY	hsa04670:Leukocyte transendothelial migration	3	CDC42, VAV3, RAC2	0.064385
GOTERM_MF_FAT	GO:0008289~lipid binding	5	PRKD2, VAV3, MYO9B, ARHGAP29, RACGAP1	0.0743164
KEGG_PATHWAY	hsa04650:Natural killer cell mediated cytotoxicity	3	NRAS, VAV3, RAC2	0.073815

## Sheet: M2 down-regulated
Category	Term	Count	Genes	Benjamini (FDR)
GOTERM_BP_FAT	GO:0006468~protein amino acid phosphorylation	16	PRKCZ, MADD, PINK1, MAPK10, GRM1, DAPK1, NTRK3, RPS6KA5, MAP3K5, HIPK2, NTRK2, MAPK8IP3, RIPK2, MAPK9, MAPK8, CAMK2A	0.000134167
GOTERM_BP_FAT	GO:0007243~protein kinase cascade	12	RPS6KA5, MAP3K5, MADD, MAPK8IP2, MAPK8IP3, MAPK9, PINK1, MAPK8, TLR4, MAPK10, GRM1, DAPK1	0.000269116
GOTERM_BP_FAT	GO:0016310~phosphorylation	16	PRKCZ, MADD, PINK1, MAPK10, GRM1, DAPK1, NTRK3, RPS6KA5, MAP3K5, HIPK2, NTRK2, MAPK8IP3, RIPK2, MAPK9, MAPK8, CAMK2A	0.000455404
GOTERM_CC_FAT	GO:0005856~cytoskeleton	20	ABLIM1, PRKCZ, GFAP, NOS1, NDN, CCDC85B, GRIA4, GRM1, DAPK1, TNNT1, GRIA2, ANK3, GRIA1, FAAH, MAPT, HIPK2, NTRK2, MAP4, SPTAN1, TUBB4	0.000449897
GOTERM_BP_FAT	GO:0006796~phosphate metabolic process	17	PRKCZ, MADD, PPM1A, PINK1, MAPK10, GRM1, DAPK1, NTRK3, RPS6KA5, MAP3K5, HIPK2, NTRK2, MAPK8IP3, RIPK2, MAPK9, MAPK8, CAMK2A	0.000787983
GOTERM_BP_FAT	GO:0006793~phosphorus metabolic process	17	PRKCZ, MADD, PPM1A, PINK1, MAPK10, GRM1, DAPK1, NTRK3, RPS6KA5, MAP3K5, HIPK2, NTRK2, MAPK8IP3, RIPK2, MAPK9, MAPK8, CAMK2A	0.000787983
KEGG_PATHWAY	hsa04722:Neurotrophin signaling pathway	9	NTRK3, RPS6KA5, MAP3K5, NTRK2, MAPK9, RIPK2, MAPK8, MAPK10, CAMK2A	0.000227182
GOTERM_CC_FAT	GO:0030424~axon	8	ANK3, MAPT, NTRK2, MAPK8IP3, GRIA4, GRM1, MBP, TUBB4	0.000471491
GOTERM_BP_FAT	GO:0007254~JNK cascade	6	MAP3K5, MAPK8IP2, MAPK8IP3, MAPK9, MAPK8, MAPK10	0.00114104
GOTERM_BP_FAT	GO:0080135~regulation of cellular response to stress	7	NTRK3, MAP3K5, HIPK2, MAPK8IP2, MAPK8IP3, RIPK2, TLR4	0.000951424
GOTERM_BP_FAT	GO:0042981~regulation of apoptosis	15	BID, PRKCZ, MADD, TLR4, FEM1B, TNFRSF4, KCNIP3, DAPK1, MAP3K5, MOAP1, HIPK2, RIPK2, MAPK9, MAPK8, FAIM2	0.00110741
GOTERM_BP_FAT	GO:0031098~stress-activated protein kinase signaling pathway	6	MAP3K5, MAPK8IP2, MAPK8IP3, MAPK9, MAPK8, MAPK10	0.000987844
GOTERM_BP_FAT	GO:0043408~regulation of MAPKKK cascade	7	MAP3K5, HIPK2, MAPK8IP2, MAPK8IP3, RIPK2, TLR4, GRM1	0.000880067
GOTERM_BP_FAT	GO:0043067~regulation of programmed cell death	15	BID, PRKCZ, MADD, TLR4, FEM1B, TNFRSF4, KCNIP3, DAPK1, MAP3K5, MOAP1, HIPK2, RIPK2, MAPK9, MAPK8, FAIM2	0.000868194
GOTERM_CC_FAT	GO:0044456~synapse part	9	SCAMP1, GRIA2, GRIA1, NTRK2, NUFIP1, GRIA4, CAMK2A, GRM1, FAIM2	0.000592932
GOTERM_BP_FAT	GO:0010941~regulation of cell death	15	BID, PRKCZ, MADD, TLR4, FEM1B, TNFRSF4, KCNIP3, DAPK1, MAP3K5, MOAP1, HIPK2, RIPK2, MAPK9, MAPK8, FAIM2	0.000823213
GOTERM_BP_FAT	GO:0046328~regulation of JNK cascade	6	MAP3K5, HIPK2, MAPK8IP2, MAPK8IP3, RIPK2, TLR4	0.000768763
GOTERM_MF_FAT	GO:0004672~protein kinase activity	13	PRKCZ, PINK1, MAPK10, DAPK1, NTRK3, RPS6KA5, MAP3K5, NTRK2, HIPK2, RIPK2, MAPK9, MAPK8, CAMK2A	0.00261406
GOTERM_BP_FAT	GO:0070302~regulation of stress-activated protein kinase signaling pathway	6	MAP3K5, HIPK2, MAPK8IP2, MAPK8IP3, RIPK2, TLR4	0.000952448
GOTERM_BP_FAT	GO:0010647~positive regulation of cell communication	10	PRKCZ, GRIA2, HIPK2, NTRK2, PPM1A, MAPK8IP2, RIPK2, PINK1, TLR4, GRIA4	0.000893871
GOTERM_CC_FAT	GO:0043005~neuron projection	10	NOS1, ANK3, MAPT, NTRK2, PPM1A, MAPK8IP3, GRIA4, GRM1, MBP, TUBB4	0.000644994
GOTERM_BP_FAT	GO:0050806~positive regulation of synaptic transmission	5	PRKCZ, GRIA2, NTRK2, PINK1, GRIA4	0.000925289
GOTERM_BP_FAT	GO:0000165~MAPKKK cascade	8	MAP3K5, MADD, MAPK8IP2, MAPK8IP3, MAPK9, MAPK8, MAPK10, GRM1	0.000954306
GOTERM_MF_FAT	GO:0004674~protein serine/threonine kinase activity	11	RPS6KA5, PRKCZ, MAP3K5, HIPK2, MAPK9, RIPK2, PINK1, MAPK8, MAPK10, CAMK2A, DAPK1	0.00197404
GOTERM_CC_FAT	GO:0045202~synapse	10	SCAMP1, GRIA2, ANK3, GRIA1, NTRK2, NUFIP1, GRIA4, CAMK2A, GRM1, FAIM2	0.000694405
GOTERM_BP_FAT	GO:0051971~positive regulation of transmission of nerve impulse	5	PRKCZ, GRIA2, NTRK2, PINK1, GRIA4	0.00115108
GOTERM_BP_FAT	GO:0031646~positive regulation of neurological system process	5	PRKCZ, GRIA2, NTRK2, PINK1, GRIA4	0.00134483
GOTERM_BP_FAT	GO:0050804~regulation of synaptic transmission	7	PRKCZ, GRIA2, NTRK2, PINK1, GRIA4, CAMK2A, GRM1	0.00147447
GOTERM_CC_FAT	GO:0044430~cytoskeletal part	15	PRKCZ, GFAP, NDN, CCDC85B, GRIA4, GRM1, TNNT1, GRIA2, GRIA1, MAPT, HIPK2, NTRK2, MAP4, TUBB4, SPTAN1	0.0011274
GOTERM_BP_FAT	GO:0044093~positive regulation of molecular function	12	PRKCZ, MOAP1, MAP3K5, MADD, ADCY5, HIPK2, NTRK2, MAPK8IP3, RIPK2, TLR4, CAMK2A, GRM1	0.00214776
GOTERM_BP_FAT	GO:0051969~regulation of transmission of nerve impulse	7	PRKCZ, GRIA2, NTRK2, PINK1, GRIA4, CAMK2A, GRM1	0.00206557
GOTERM_BP_FAT	GO:0031644~regulation of neurological system process	7	PRKCZ, GRIA2, NTRK2, PINK1, GRIA4, CAMK2A, GRM1	0.00246523
GOTERM_MF_FAT	GO:0004705~JUN kinase activity	3	MAPK9, MAPK8, MAPK10	0.00429375
GOTERM_CC_FAT	GO:0044463~cell projection part	8	NOS1, NTRK2, MAPK8IP3, ANTXR1, GRIA4, GRM1, MBP, TUBB4	0.00164127
GOTERM_BP_FAT	GO:0044057~regulation of system process	9	PRKCZ, NOS1, TNNT1, GRIA2, NTRK2, PINK1, GRIA4, CAMK2A, GRM1	0.0025328
GOTERM_BP_FAT	GO:0051966~regulation of synaptic transmission, glutamatergic	4	GRIA2, NTRK2, GRIA4, GRM1	0.0030076
GOTERM_CC_FAT	GO:0033267~axon part	5	NTRK2, MAPK8IP3, GRIA4, MBP, TUBB4	0.00196248
GOTERM_BP_FAT	GO:0051240~positive regulation of multicellular organismal process	8	PRKCZ, NOS1, GRIA2, NTRK2, RIPK2, PINK1, TLR4, GRIA4	0.00368212
GOTERM_BP_FAT	GO:0070304~positive regulation of stress-activated protein kinase signaling pathway	4	HIPK2, MAPK8IP2, RIPK2, TLR4	0.00378512
GOTERM_BP_FAT	GO:0010627~regulation of protein kinase cascade	8	MAP3K5, HIPK2, PPM1A, MAPK8IP2, MAPK8IP3, RIPK2, TLR4, GRM1	0.00386898
GOTERM_MF_FAT	GO:0001883~purine nucleoside binding	19	PRKCZ, NOS1, ADCY5, PINK1, MAPK10, DAPK1, RPS6KA5, NTRK3, MAP3K5, RAD51L1, HIPK2, PDE5A, NTRK2, MAPK9, RIPK2, MAPK8, ITPK1, CAMK2A, CHD3	0.00748151
GOTERM_MF_FAT	GO:0001882~nucleoside binding	19	PRKCZ, NOS1, ADCY5, PINK1, MAPK10, DAPK1, RPS6KA5, NTRK3, MAP3K5, RAD51L1, HIPK2, PDE5A, NTRK2, MAPK9, RIPK2, MAPK8, ITPK1, CAMK2A, CHD3	0.00654037
KEGG_PATHWAY	hsa04010:MAPK signaling pathway	10	RPS6KA5, MAP3K5, MAPT, NTRK2, PPM1A, MAPK8IP2, MAPK8IP3, MAPK9, MAPK8, MAPK10	0.00489212
GOTERM_CC_FAT	GO:0014069~postsynaptic density	5	GRIA2, GRIA1, NTRK2, GRIA4, GRM1	0.00506954
GOTERM_BP_FAT	GO:0006915~apoptosis	11	BID, MOAP1, MAP3K5, MADD, HIPK2, RIPK2, MAPK8, FEM1B, FAIM2, DAPK1, KCNIP3	0.00957695
GOTERM_MF_FAT	GO:0016909~SAP kinase activity	3	MAPK9, MAPK8, MAPK10	0.0106095
GOTERM_BP_FAT	GO:0012501~programmed cell death	11	BID, MOAP1, MAP3K5, MADD, HIPK2, RIPK2, MAPK8, FEM1B, FAIM2, DAPK1, KCNIP3	0.0104066
GOTERM_MF_FAT	GO:0008066~glutamate receptor activity	4	GRIA2, GRIA1, GRIA4, GRM1	0.0108792
GOTERM_MF_FAT	GO:0030554~adenyl nucleotide binding	18	PRKCZ, NOS1, ADCY5, PINK1, MAPK10, DAPK1, RPS6KA5, NTRK3, MAP3K5, RAD51L1, HIPK2, NTRK2, MAPK9, RIPK2, MAPK8, ITPK1, CAMK2A, CHD3	0.0101399
GOTERM_CC_FAT	GO:0030666~endocytic vesicle membrane	4	GRIA2, GRIA1, GRIA4, CAMK2A	0.00710819
GOTERM_MF_FAT	GO:0017076~purine nucleotide binding	20	PRKCZ, NOS1, ADCY5, PINK1, MAPK10, DAPK1, RPS6KA5, NTRK3, MAP3K5, RAD51L1, HIPK2, PDE5A, NTRK2, MAPK9, RIPK2, MAPK8, ITPK1, CAMK2A, CHD3, TUBB4	0.0107892
GOTERM_MF_FAT	GO:0005524~ATP binding	17	PRKCZ, ADCY5, PINK1, MAPK10, DAPK1, NTRK3, RPS6KA5, MAP3K5, RAD51L1, HIPK2, NTRK2, MAPK9, RIPK2, MAPK8, ITPK1, CAMK2A, CHD3	0.0120576
GOTERM_BP_FAT	GO:0043065~positive regulation of apoptosis	9	BID, MAP3K5, HIPK2, MAPK9, RIPK2, MAPK8, TLR4, FEM1B, DAPK1	0.0183263
GOTERM_BP_FAT	GO:0043068~positive regulation of programmed cell death	9	BID, MAP3K5, HIPK2, MAPK9, RIPK2, MAPK8, TLR4, FEM1B, DAPK1	0.0185631
GOTERM_BP_FAT	GO:0010942~positive regulation of cell death	9	BID, MAP3K5, HIPK2, MAPK9, RIPK2, MAPK8, TLR4, FEM1B, DAPK1	0.0185361
GOTERM_MF_FAT	GO:0032559~adenyl ribonucleotide binding	17	PRKCZ, ADCY5, PINK1, MAPK10, DAPK1, NTRK3, RPS6KA5, MAP3K5, RAD51L1, HIPK2, NTRK2, MAPK9, RIPK2, MAPK8, ITPK1, CAMK2A, CHD3	0.0127267
GOTERM_CC_FAT	GO:0043232~intracellular non-membrane-bounded organelle	23	ABLIM1, PRKCZ, GFAP, NOS1, NDN, PPP2R5A, CCDC85B, NUFIP1, GRIA4, GRM1, DAPK1, TNNT1, GRIA2, ANK3, GRIA1, FAAH, MAPT, HIPK2, NTRK2, MAP4, CHD3, SPTAN1, TUBB4	0.0110184
GOTERM_CC_FAT	GO:0043228~non-membrane-bounded organelle	23	ABLIM1, PRKCZ, GFAP, NOS1, NDN, PPP2R5A, CCDC85B, NUFIP1, GRIA4, GRM1, DAPK1, TNNT1, GRIA2, ANK3, GRIA1, FAAH, MAPT, HIPK2, NTRK2, MAP4, CHD3, SPTAN1, TUBB4	0.0110184
GOTERM_BP_FAT	GO:0032874~positive regulation of stress-activated MAPK cascade	3	MAPK8IP2, RIPK2, TLR4	0.0193846
GOTERM_CC_FAT	GO:0042995~cell projection	11	NOS1, ANK3, MAPT, NTRK2, PPM1A, MAPK8IP3, ANTXR1, GRIA4, GRM1, MBP, TUBB4	0.0107737
KEGG_PATHWAY	hsa05014:Amyotrophic lateral sclerosis (ALS)	5	BID, MAP3K5, NOS1, GRIA2, GRIA1	0.0137482
GOTERM_MF_FAT	GO:0032553~ribonucleotide binding	19	PRKCZ, ADCY5, PINK1, MAPK10, DAPK1, RPS6KA5, NTRK3, MAP3K5, RAD51L1, HIPK2, PDE5A, NTRK2, MAPK9, RIPK2, MAPK8, ITPK1, CAMK2A, CHD3, TUBB4	0.013749
GOTERM_MF_FAT	GO:0032555~purine ribonucleotide binding	19	PRKCZ, ADCY5, PINK1, MAPK10, DAPK1, RPS6KA5, NTRK3, MAP3K5, RAD51L1, HIPK2, PDE5A, NTRK2, MAPK9, RIPK2, MAPK8, ITPK1, CAMK2A, CHD3, TUBB4	0.013749
GOTERM_CC_FAT	GO:0043025~cell soma	6	NDN, NTRK2, MAPK8IP2, GRIA4, MBP, TUBB4	0.0109942
GOTERM_BP_FAT	GO:0032872~regulation of stress-activated MAPK cascade	3	MAPK8IP2, RIPK2, TLR4	0.023405
GOTERM_BP_FAT	GO:0007242~intracellular signaling cascade	15	PRKCZ, MADD, ADCY5, PINK1, TLR4, MAPK10, GRM1, DAPK1, RPS6KA5, MAP3K5, HIPK2, MAPK8IP2, MAPK8IP3, MAPK9, MAPK8	0.0258108
GOTERM_MF_FAT	GO:0005123~death receptor binding	3	BID, MADD, FEM1B	0.0176422
GOTERM_BP_FAT	GO:0008219~cell death	11	BID, MOAP1, MAP3K5, MADD, HIPK2, RIPK2, MAPK8, FEM1B, FAIM2, DAPK1, KCNIP3	0.029489
GOTERM_BP_FAT	GO:0016265~death	11	BID, MOAP1, MAP3K5, MADD, HIPK2, RIPK2, MAPK8, FEM1B, FAIM2, DAPK1, KCNIP3	0.0302282
GOTERM_BP_FAT	GO:0043410~positive regulation of MAPKKK cascade	4	HIPK2, MAPK8IP2, RIPK2, TLR4	0.0305334
GOTERM_CC_FAT	GO:0044459~plasma membrane part	20	PRKCZ, SELL, PPM1A, TLR4, GRIA4, TNFRSF4, GRM1, MBP, NTRK3, GRIA2, ANK3, GRIA1, MAPT, NTRK2, MAPK8IP3, PTCH1, ANTXR1, CAMK2A, FAIM2, SPTAN1	0.0197145
GOTERM_BP_FAT	GO:0008624~induction of apoptosis by extracellular signals	5	BID, MAP3K5, MAPK9, MAPK8, DAPK1	0.0362187
GOTERM_MF_FAT	GO:0004707~MAP kinase activity	3	MAPK9, MAPK8, MAPK10	0.0267569
GOTERM_BP_FAT	GO:0051101~regulation of DNA binding	5	HIPK2, RIPK2, TLR4, TNFRSF4, CAMK2A	0.0466539
GOTERM_CC_FAT	GO:0030139~endocytic vesicle	4	GRIA2, GRIA1, GRIA4, CAMK2A	0.0258663
GOTERM_BP_FAT	GO:0046330~positive regulation of JNK cascade	3	HIPK2, RIPK2, TLR4	0.0565678
GOTERM_BP_FAT	GO:0006917~induction of apoptosis	7	BID, MAP3K5, HIPK2, MAPK9, MAPK8, FEM1B, DAPK1	0.0624859
GOTERM_MF_FAT	GO:0004970~ionotropic glutamate receptor activity	3	GRIA2, GRIA1, GRIA4	0.0412245
GOTERM_BP_FAT	GO:0012502~induction of programmed cell death	7	BID, MAP3K5, HIPK2, MAPK9, MAPK8, FEM1B, DAPK1	0.0620008
GOTERM_CC_FAT	GO:0030659~cytoplasmic vesicle membrane	5	SCAMP1, GRIA2, GRIA1, GRIA4, CAMK2A	0.0347408
GOTERM_BP_FAT	GO:0045860~positive regulation of protein kinase activity	6	PRKCZ, MAP3K5, MADD, ADCY5, MAPK8IP3, GRM1	0.0634338
GOTERM_MF_FAT	GO:0000166~nucleotide binding	20	PRKCZ, NOS1, ADCY5, PINK1, MAPK10, DAPK1, RPS6KA5, NTRK3, MAP3K5, RAD51L1, HIPK2, PDE5A, NTRK2, MAPK9, RIPK2, MAPK8, ITPK1, CAMK2A, CHD3, TUBB4	0.0412813
GOTERM_MF_FAT	GO:0005234~extracellular-glutamate-gated ion channel activity	3	GRIA2, GRIA1, GRIA4	0.0405582
GOTERM_BP_FAT	GO:0033674~positive regulation of kinase activity	6	PRKCZ, MAP3K5, MADD, ADCY5, MAPK8IP3, GRM1	0.0718252
GOTERM_BP_FAT	GO:0051129~negative regulation of cellular component organization	5	PRKCZ, MAPT, MAP4, SPTAN1, MBP	0.0714802
GOTERM_BP_FAT	GO:0043388~positive regulation of DNA binding	4	HIPK2, RIPK2, TLR4, CAMK2A	0.0714632
GOTERM_BP_FAT	GO:0010975~regulation of neuron projection development	4	NTRK3, MAPT, NTRK2, MBP	0.0714632
GOTERM_BP_FAT	GO:0048584~positive regulation of response to stimulus	6	NTRK3, MASP1, HIPK2, MAPK8IP2, RIPK2, TLR4	0.0737045
GOTERM_CC_FAT	GO:0012506~vesicle membrane	5	SCAMP1, GRIA2, GRIA1, GRIA4, CAMK2A	0.0438103
GOTERM_BP_FAT	GO:0045859~regulation of protein kinase activity	7	PRKCZ, MAP3K5, MADD, ADCY5, MAPK8IP3, TNFRSF4, GRM1	0.0769614
GOTERM_BP_FAT	GO:0051347~positive regulation of transferase activity	6	PRKCZ, MAP3K5, MADD, ADCY5, MAPK8IP3, GRM1	0.0759081
GOTERM_BP_FAT	GO:0042325~regulation of phosphorylation	8	PRKCZ, MAP3K5, MADD, ADCY5, MAPK8IP3, TLR4, TNFRSF4, GRM1	0.0783627
GOTERM_BP_FAT	GO:0051098~regulation of binding	5	HIPK2, RIPK2, TLR4, TNFRSF4, CAMK2A	0.0820401
GOTERM_BP_FAT	GO:0043549~regulation of kinase activity	7	PRKCZ, MAP3K5, MADD, ADCY5, MAPK8IP3, TNFRSF4, GRM1	0.0837081
GOTERM_BP_FAT	GO:0051099~positive regulation of binding	4	HIPK2, RIPK2, TLR4, CAMK2A	0.0838055
GOTERM_CC_FAT	GO:0030425~dendrite	5	NOS1, NTRK2, MAPK8IP3, GRIA4, GRM1	0.0539985
GOTERM_BP_FAT	GO:0019220~regulation of phosphate metabolic process	8	PRKCZ, MAP3K5, MADD, ADCY5, MAPK8IP3, TLR4, TNFRSF4, GRM1	0.0897062
GOTERM_BP_FAT	GO:0051174~regulation of phosphorus metabolic process	8	PRKCZ, MAP3K5, MADD, ADCY5, MAPK8IP3, TLR4, TNFRSF4, GRM1	0.0897062
GOTERM_BP_FAT	GO:0000187~activation of MAPK activity	4	MAP3K5, MADD, MAPK8IP3, GRM1	0.0925037
KEGG_PATHWAY	hsa04930:Type II diabetes mellitus	4	PRKCZ, MAPK9, MAPK8, MAPK10	0.078959
GOTERM_BP_FAT	GO:0051338~regulation of transferase activity	7	PRKCZ, MAP3K5, MADD, ADCY5, MAPK8IP3, TNFRSF4, GRM1	0.0943441
GOTERM_BP_FAT	GO:0010740~positive regulation of protein kinase cascade	5	HIPK2, PPM1A, MAPK8IP2, RIPK2, TLR4	0.0992166
GOTERM_MF_FAT	GO:0008092~cytoskeletal protein binding	8	ABLIM1, TNNT1, NDN, MAPT, MAPK8IP2, MAPK8IP3, ANTXR1, SPTAN1	0.0812459
KEGG_PATHWAY	hsa04912:GnRH signaling pathway	5	ADCY5, MAPK9, MAPK8, MAPK10, CAMK2A	0.0766233
GOTERM_MF_FAT	GO:0032813~tumor necrosis factor receptor superfamily binding	3	BID, MADD, FEM1B	0.092982
GOTERM_CC_FAT	GO:0044433~cytoplasmic vesicle part	5	SCAMP1, GRIA2, GRIA1, GRIA4, CAMK2A	0.0814874
GOTERM_CC_FAT	GO:0005886~plasma membrane	26	PRKCZ, ADCY5, PPM1A, TLR4, TNFRSF4, MBP, KCNIP3, ANK3, MAPT, CAMK2A, NOS1, SELL, MADD, MAPK10, GRIA4, GRM1, NTRK3, CPE, GRIA2, GRIA1, NTRK2, MAPK8IP3, PTCH1, ANTXR1, FAIM2, SPTAN1	0.0815595

## Sheet: M2 up-regulated
Category	Term	Count	Genes	Benjamini (FDR)
GOTERM_BP_FAT	GO:0042981~regulation of apoptosis	48	TRAF2, CCL2, MCL1, SOX9, CITED2, CASP6, TUBB, CASP3, CASP4, HMOX1, CASP8, TNFRSF19, BCL3, HSPA5, FAS, DAP, CASP1, FOSL1, CASP2, TOP2A, MSH6, CFLAR, NOL3, CEBPB, BRCA2, MALT1, IFI16, BIRC3, GAL, STK3, BRCA1, DDIT3, TRADD, ATF5, PLA2G4A, TNFRSF10B, NUP62, JUN, IFT57, RIPK1, BAX, F3, SCIN, SORT1, NGFR, FAF1, TNFAIP3, BARD1	1.6359e-20
GOTERM_BP_FAT	GO:0043067~regulation of programmed cell death	48	TRAF2, CCL2, MCL1, SOX9, CITED2, CASP6, TUBB, CASP3, CASP4, HMOX1, CASP8, TNFRSF19, BCL3, HSPA5, FAS, DAP, CASP1, FOSL1, CASP2, TOP2A, MSH6, CFLAR, NOL3, CEBPB, BRCA2, MALT1, IFI16, BIRC3, GAL, STK3, BRCA1, DDIT3, TRADD, ATF5, PLA2G4A, TNFRSF10B, NUP62, JUN, IFT57, RIPK1, BAX, F3, SCIN, SORT1, NGFR, FAF1, TNFAIP3, BARD1	1.24621e-20
GOTERM_BP_FAT	GO:0010941~regulation of cell death	48	TRAF2, CCL2, MCL1, SOX9, CITED2, CASP6, TUBB, CASP3, CASP4, HMOX1, CASP8, TNFRSF19, BCL3, HSPA5, FAS, DAP, CASP1, FOSL1, CASP2, TOP2A, MSH6, CFLAR, NOL3, CEBPB, BRCA2, MALT1, IFI16, BIRC3, GAL, STK3, BRCA1, DDIT3, TRADD, ATF5, PLA2G4A, TNFRSF10B, NUP62, JUN, IFT57, RIPK1, BAX, F3, SCIN, SORT1, NGFR, FAF1, TNFAIP3, BARD1	9.71682e-21
GOTERM_BP_FAT	GO:0043065~positive regulation of apoptosis	35	TRAF2, CASP6, CASP3, TUBB, CASP4, HMOX1, CASP8, TNFRSF19, BCL3, FAS, DAP, CASP1, TOP2A, CASP2, FOSL1, MSH6, CFLAR, CEBPB, BRCA2, IFI16, GAL, STK3, BRCA1, DDIT3, TRADD, PLA2G4A, TNFRSF10B, JUN, RIPK1, BAX, SCIN, SORT1, FAF1, NGFR, BARD1	1.82942e-18
GOTERM_BP_FAT	GO:0043068~positive regulation of programmed cell death	35	TRAF2, CASP6, CASP3, TUBB, CASP4, HMOX1, CASP8, TNFRSF19, BCL3, FAS, DAP, CASP1, TOP2A, CASP2, FOSL1, MSH6, CFLAR, CEBPB, BRCA2, IFI16, GAL, STK3, BRCA1, DDIT3, TRADD, PLA2G4A, TNFRSF10B, JUN, RIPK1, BAX, SCIN, SORT1, FAF1, NGFR, BARD1	1.82692e-18
GOTERM_BP_FAT	GO:0010942~positive regulation of cell death	35	TRAF2, CASP6, CASP3, TUBB, CASP4, HMOX1, CASP8, TNFRSF19, BCL3, FAS, DAP, CASP1, TOP2A, CASP2, FOSL1, MSH6, CFLAR, CEBPB, BRCA2, IFI16, GAL, STK3, BRCA1, DDIT3, TRADD, PLA2G4A, TNFRSF10B, JUN, RIPK1, BAX, SCIN, SORT1, FAF1, NGFR, BARD1	1.76327e-18
GOTERM_BP_FAT	GO:0006917~induction of apoptosis	24	MSH6, CFLAR, CEBPB, BRCA2, IFI16, BRCA1, TRADD, CASP6, CASP3, TUBB, TNFRSF10B, CASP4, HMOX1, BAX, RIPK1, CASP8, SORT1, BCL3, TNFRSF19, DAP, FAS, NGFR, CASP1, CASP2	4.10351e-11
GOTERM_BP_FAT	GO:0012502~induction of programmed cell death	24	MSH6, CFLAR, CEBPB, BRCA2, IFI16, BRCA1, TRADD, CASP6, CASP3, TUBB, TNFRSF10B, CASP4, HMOX1, BAX, RIPK1, CASP8, SORT1, BCL3, TNFRSF19, DAP, FAS, NGFR, CASP1, CASP2	3.83727e-11
GOTERM_BP_FAT	GO:0008219~cell death	34	TRAF2, TSPO, FOSL2, MCL1, TNFRSF12A, CASP6, TNFRSF1A, CASP3, CASP4, HMOX1, CASP8, TNFRSF19, FAS, DAP, CASP1, TOP2A, CASP2, CFLAR, NOL3, TNFRSF14, BIRC3, STK3, BRCA1, TRADD, TNFRSF10B, NUP62, JUN, BAX, F3, RIPK1, IFT57, FAF1, NGFR, TNFAIP3	3.71752e-11
GOTERM_BP_FAT	GO:0016265~death	34	TRAF2, TSPO, FOSL2, MCL1, TNFRSF12A, CASP6, TNFRSF1A, CASP3, CASP4, HMOX1, CASP8, TNFRSF19, FAS, DAP, CASP1, TOP2A, CASP2, CFLAR, NOL3, TNFRSF14, BIRC3, STK3, BRCA1, TRADD, TNFRSF10B, NUP62, JUN, BAX, F3, RIPK1, IFT57, FAF1, NGFR, TNFAIP3	4.06244e-11
GOTERM_BP_FAT	GO:0006915~apoptosis	31	TRAF2, TSPO, MCL1, TNFRSF12A, CASP6, TNFRSF1A, CASP3, CASP4, CASP8, TNFRSF19, FAS, DAP, CASP1, TOP2A, CASP2, CFLAR, NOL3, TNFRSF14, BIRC3, STK3, BRCA1, TRADD, TNFRSF10B, JUN, BAX, F3, RIPK1, IFT57, FAF1, NGFR, TNFAIP3	5.70867e-11
GOTERM_BP_FAT	GO:0012501~programmed cell death	31	TRAF2, TSPO, MCL1, TNFRSF12A, CASP6, TNFRSF1A, CASP3, CASP4, CASP8, TNFRSF19, FAS, DAP, CASP1, TOP2A, CASP2, CFLAR, NOL3, TNFRSF14, BIRC3, STK3, BRCA1, TRADD, TNFRSF10B, JUN, BAX, F3, RIPK1, IFT57, FAF1, NGFR, TNFAIP3	7.67616e-11
GOTERM_BP_FAT	GO:0033554~cellular response to stress	29	DUSP10, BCCIP, TPM1, FOS, CASP3, HMOX1, BCL3, TNFRSF19, H2AFX, ERO1L, HSPA5, TOP2A, MSH6, USP1, BRCA2, BRIP1, IFI16, RAD54L, DDIT3, BRCA1, RAD51, RBBP8, RECQL, FANCD2, JUN, BAX, RIPK1, NFE2L2, BARD1	4.01615e-10
GOTERM_BP_FAT	GO:0010033~response to organic substance	32	CCL2, MCL1, CITED1, FOS, CASP6, TNFRSF1A, CASP3, HMOX1, CASP8, HSPA6, HSPA4, FAS, ERO1L, CASP1, DDOST, FOSL1, EGR1, HCLS1, BRCA2, MALT1, GAL, JUNB, BRCA1, DDIT3, DUSP4, PLA2G4A, THBD, NUP62, JUN, RIPK1, SORT1, NFE2L2	8.14842e-10
GOTERM_BP_FAT	GO:0043066~negative regulation of apoptosis	22	CFLAR, CCL2, CEBPB, NOL3, MCL1, MALT1, BIRC3, CITED2, ATF5, CASP3, NUP62, HMOX1, F3, BAX, BCL3, SORT1, FAS, HSPA5, NGFR, TNFAIP3, CASP2, BARD1	9.13008e-09
GOTERM_BP_FAT	GO:0043069~negative regulation of programmed cell death	22	CFLAR, CCL2, CEBPB, NOL3, MCL1, MALT1, BIRC3, CITED2, ATF5, CASP3, NUP62, HMOX1, F3, BAX, BCL3, SORT1, FAS, HSPA5, NGFR, TNFAIP3, CASP2, BARD1	1.11069e-08
GOTERM_BP_FAT	GO:0060548~negative regulation of cell death	22	CFLAR, CCL2, CEBPB, NOL3, MCL1, MALT1, BIRC3, CITED2, ATF5, CASP3, NUP62, HMOX1, F3, BAX, BCL3, SORT1, FAS, HSPA5, NGFR, TNFAIP3, CASP2, BARD1	1.10069e-08
GOTERM_BP_FAT	GO:0009628~response to abiotic stimulus	22	MSH6, CCL2, USP1, IL18, BRCA2, RAD54L, JUNB, BRCA1, CASP6, FOS, CASP3, PLA2G4A, THBD, FANCD2, JUN, BAX, BCL3, HSPA4, H2AFX, NGFR, ERO1L, FOSL1	1.56102e-08
GOTERM_BP_FAT	GO:0006916~anti-apoptosis	17	CFLAR, CCL2, CEBPB, NOL3, MCL1, MALT1, BIRC3, CITED2, ATF5, HMOX1, F3, BAX, NGFR, HSPA5, FAS, TNFAIP3, CASP2	3.09067e-08
GOTERM_BP_FAT	GO:0010604~positive regulation of macromolecule metabolic process	31	TTK, SOX9, CITED1, CITED2, FOS, TNFRSF1A, HMOX1, BCL3, H2AFX, NFATC2, RUNX1, RUNX2, FOSL1, EGR1, CEBPB, MAP2K3, HCLS1, CREB5, TNFRSF14, CD40, HMGA1, JUNB, BRCA1, DDIT3, RAD51, NUP62, JUN, IRF1, HIVEP3, NFE2L2, BARD1	1.93445e-07
GOTERM_BP_FAT	GO:0045935~positive regulation of nucleobase, nucleoside, nucleotide and nucleic acid metabolic process	26	SOX9, CITED1, CITED2, FOS, TNFRSF1A, BCL3, H2AFX, NFATC2, RUNX1, RUNX2, FOSL1, EGR1, CEBPB, MAP2K3, CREB5, CD40, HMGA1, DDIT3, JUNB, BRCA1, RAD51, NUP62, JUN, IRF1, HIVEP3, NFE2L2	3.47462e-07
GOTERM_CC_FAT	GO:0043228~non-membrane-bounded organelle	50	FOSL2, PDLIM7, TTK, PDLIM1, IQGAP1, CITED2, FOS, CASP3, HMOX1, CASP8, HIST1H2BJ, TUBB6, H2AFX, MSN, TOP2A, NOL3, EXOSC9, KIF15, IFI16, HMGA1, JUNB, RAD51, FANCD2, JUN, SCIN, TNFAIP3, TRIOBP, LMNB1, VIM, AKAP12, IGF2BP2, ELK3, TPM2, SOX9, TPM1, TUBB, PPL, HAP1, MSH6, HIST1H2BC, MKI67, FSCN1, BRCA2, PTPN13, CENPE, BRCA1, TRADD, ATF3, NUP62, IFT57	1.061e-06
GOTERM_CC_FAT	GO:0043232~intracellular non-membrane-bounded organelle	50	FOSL2, PDLIM7, TTK, PDLIM1, IQGAP1, CITED2, FOS, CASP3, HMOX1, CASP8, HIST1H2BJ, TUBB6, H2AFX, MSN, TOP2A, NOL3, EXOSC9, KIF15, IFI16, HMGA1, JUNB, RAD51, FANCD2, JUN, SCIN, TNFAIP3, TRIOBP, LMNB1, VIM, AKAP12, IGF2BP2, ELK3, TPM2, SOX9, TPM1, TUBB, PPL, HAP1, MSH6, HIST1H2BC, MKI67, FSCN1, BRCA2, PTPN13, CENPE, BRCA1, TRADD, ATF3, NUP62, IFT57	1.061e-06
GOTERM_CC_FAT	GO:0031981~nuclear lumen	36	FOSL2, LMNB1, MCL1, EZH2, PDLIM1, ELK3, SOX9, IQGAP1, FOS, CASP6, CASP3, HMOX1, CASP8, H2AFX, MSN, TOP2A, RUNX2, NOL3, EXOSC9, CEBPB, MKI67, USP1, BRCA2, IFI16, HMGA1, JUNB, BRCA1, RAD51, DUSP4, ATF5, ATF3, NUP62, FANCD2, JUN, NGFR, KPNA2	5.56307e-07
GOTERM_BP_FAT	GO:0010647~positive regulation of cell communication	19	CFLAR, CCL2, HCLS1, EDA2R, TTK, MALT1, CD40, JAG1, CITED1, TRADD, CITED2, TNFRSF1A, TNFRSF10B, NUP62, HMOX1, F3, RIPK1, CASP8, CASP1	5.63388e-07
GOTERM_BP_FAT	GO:0051173~positive regulation of nitrogen compound metabolic process	26	SOX9, CITED1, CITED2, FOS, TNFRSF1A, BCL3, H2AFX, NFATC2, RUNX1, RUNX2, FOSL1, EGR1, CEBPB, MAP2K3, CREB5, CD40, HMGA1, DDIT3, JUNB, BRCA1, RAD51, NUP62, JUN, IRF1, HIVEP3, NFE2L2	5.98807e-07
GOTERM_BP_FAT	GO:0006974~response to DNA damage stimulus	20	MSH6, USP1, BRIP1, BRCA2, BCCIP, IFI16, RAD54L, BRCA1, DDIT3, RBBP8, RAD51, RECQL, CASP3, FANCD2, HMOX1, BAX, BCL3, H2AFX, TOP2A, BARD1	6.13188e-07
GOTERM_BP_FAT	GO:0009967~positive regulation of signal transduction	18	CFLAR, HCLS1, EDA2R, TTK, MALT1, CD40, JAG1, CITED1, TRADD, CITED2, TNFRSF1A, TNFRSF10B, NUP62, HMOX1, F3, RIPK1, CASP8, CASP1	6.20637e-07
GOTERM_BP_FAT	GO:0043122~regulation of I-kappaB kinase/NF-kappaB cascade	12	TNFRSF1A, CFLAR, TNFRSF10B, NUP62, HMOX1, RIPK1, CASP8, MALT1, CD40, TNFAIP3, CASP1, TRADD	8.02922e-07
GOTERM_BP_FAT	GO:0010740~positive regulation of protein kinase cascade	14	CFLAR, HCLS1, EDA2R, MALT1, CD40, TRADD, TNFRSF1A, TNFRSF10B, NUP62, HMOX1, RIPK1, F3, CASP8, CASP1	1.04819e-06
GOTERM_BP_FAT	GO:0009314~response to radiation	15	MSH6, CCL2, USP1, BRCA2, RAD54L, BRCA1, JUNB, FOS, CASP6, CASP3, THBD, FANCD2, BAX, BCL3, H2AFX	1.07983e-06
KEGG_PATHWAY	hsa04210:Apoptosis	12	TRAF2, TNFRSF1A, CASP6, CFLAR, CASP3, TNFRSF10B, RIPK1, BAX, CASP8, FAS, BIRC3, TRADD	3.05411e-06
GOTERM_CC_FAT	GO:0043233~organelle lumen	39	FOSL2, LMNB1, MCL1, EZH2, PDLIM1, ELK3, SOX9, IQGAP1, FOS, CASP6, CASP3, HMOX1, CASP8, ERAP1, H2AFX, HSPA5, MSN, TOP2A, RUNX2, THBS3, NOL3, CEBPB, EXOSC9, MKI67, USP1, BRCA2, IFI16, HMGA1, JUNB, BRCA1, RAD51, DUSP4, ATF5, ATF3, NUP62, FANCD2, JUN, NGFR, KPNA2	3.48242e-06
GOTERM_BP_FAT	GO:0043123~positive regulation of I-kappaB kinase/NF-kappaB cascade	11	TNFRSF1A, CFLAR, TNFRSF10B, NUP62, HMOX1, RIPK1, CASP8, MALT1, CD40, CASP1, TRADD	3.31471e-06
GOTERM_BP_FAT	GO:0045941~positive regulation of transcription	23	EGR1, CEBPB, MAP2K3, CREB5, SOX9, HMGA1, JUNB, BRCA1, CITED1, DDIT3, CITED2, FOS, TNFRSF1A, NUP62, JUN, HIVEP3, IRF1, BCL3, NFE2L2, RUNX1, NFATC2, RUNX2, FOSL1	3.75467e-06
GOTERM_CC_FAT	GO:0031974~membrane-enclosed lumen	39	FOSL2, LMNB1, MCL1, EZH2, PDLIM1, ELK3, SOX9, IQGAP1, FOS, CASP6, CASP3, HMOX1, CASP8, ERAP1, H2AFX, HSPA5, MSN, TOP2A, RUNX2, THBS3, NOL3, CEBPB, EXOSC9, MKI67, USP1, BRCA2, IFI16, HMGA1, JUNB, BRCA1, RAD51, DUSP4, ATF5, ATF3, NUP62, FANCD2, JUN, NGFR, KPNA2	4.42499e-06
GOTERM_CC_FAT	GO:0070013~intracellular organelle lumen	38	FOSL2, LMNB1, MCL1, EZH2, PDLIM1, ELK3, SOX9, IQGAP1, FOS, CASP6, CASP3, HMOX1, CASP8, ERAP1, H2AFX, HSPA5, MSN, TOP2A, RUNX2, NOL3, CEBPB, EXOSC9, MKI67, USP1, BRCA2, IFI16, HMGA1, JUNB, BRCA1, RAD51, DUSP4, ATF5, ATF3, NUP62, FANCD2, JUN, NGFR, KPNA2	3.78493e-06
GOTERM_BP_FAT	GO:0010628~positive regulation of gene expression	23	EGR1, CEBPB, MAP2K3, CREB5, SOX9, HMGA1, JUNB, BRCA1, CITED1, DDIT3, CITED2, FOS, TNFRSF1A, NUP62, JUN, HIVEP3, IRF1, BCL3, NFE2L2, RUNX1, NFATC2, RUNX2, FOSL1	6.11223e-06
GOTERM_BP_FAT	GO:0034097~response to cytokine stimulus	10	CASP6, FOS, CASP3, MCL1, JUN, RIPK1, CASP8, FOSL1, DDOST, JUNB	5.9385e-06
GOTERM_BP_FAT	GO:0031328~positive regulation of cellular biosynthetic process	25	SOX9, CITED1, CITED2, FOS, TNFRSF1A, HMOX1, BCL3, NFATC2, RUNX1, RUNX2, FOSL1, EGR1, CEBPB, MAP2K3, CREB5, HMGA1, DDIT3, JUNB, BRCA1, PLA2G4A, NUP62, JUN, IRF1, HIVEP3, NFE2L2	6.03421e-06
GOTERM_BP_FAT	GO:0009891~positive regulation of biosynthetic process	25	SOX9, CITED1, CITED2, FOS, TNFRSF1A, HMOX1, BCL3, NFATC2, RUNX1, RUNX2, FOSL1, EGR1, CEBPB, MAP2K3, CREB5, HMGA1, DDIT3, JUNB, BRCA1, PLA2G4A, NUP62, JUN, IRF1, HIVEP3, NFE2L2	7.66149e-06
GOTERM_BP_FAT	GO:0010212~response to ionizing radiation	9	CASP6, CCL2, THBD, FANCD2, BAX, BRCA2, H2AFX, RAD54L, BRCA1	8.16401e-06
GOTERM_BP_FAT	GO:0051094~positive regulation of developmental process	16	PDLIM7, TNFRSF12A, JAG1, JUNB, TRADD, CASP6, TNFRSF1A, PLA2G4A, JUN, BAX, F3, SCIN, ERAP1, NGFR, RUNX1, RUNX2	8.07029e-06
GOTERM_BP_FAT	GO:0010557~positive regulation of macromolecule biosynthetic process	24	EGR1, CEBPB, MAP2K3, CREB5, SOX9, HMGA1, JUNB, BRCA1, CITED1, DDIT3, CITED2, FOS, TNFRSF1A, NUP62, HMOX1, JUN, HIVEP3, IRF1, BCL3, NFE2L2, RUNX1, NFATC2, RUNX2, FOSL1	9.59946e-06
GOTERM_BP_FAT	GO:0010627~regulation of protein kinase cascade	15	CFLAR, HCLS1, EDA2R, MALT1, CD40, TRADD, TNFRSF1A, TNFRSF10B, NUP62, HMOX1, RIPK1, F3, CASP8, TNFAIP3, CASP1	1.22501e-05
GOTERM_MF_FAT	GO:0004197~cysteine-type endopeptidase activity	9	CASP6, CFLAR, CASP3, CASP4, USP1, CASP8, MALT1, CASP1, CASP2	0.000211659
GOTERM_BP_FAT	GO:0006259~DNA metabolic process	20	MSH6, USP1, BRIP1, BRCA2, BCCIP, RAD54L, HMGA1, BRCA1, RBBP8, RAD51, FOS, RECQL, CASP3, FANCD2, BAX, RRM1, H2AFX, KPNA2, TOP2A, BARD1	4.44833e-05
GOTERM_BP_FAT	GO:0008629~induction of apoptosis by intracellular signals	8	MSH6, CASP3, HMOX1, BAX, BCL3, BRCA2, IFI16, BRCA1	5.30716e-05
GOTERM_MF_FAT	GO:0003700~transcription factor activity	28	FOSL2, ELK3, SOX9, CITED1, CITED2, FOS, BCL3, NFATC2, RUNX1, RUNX2, FOSL1, EGR1, BATF3, CEBPB, CREBZF, CEBPD, HCLS1, EN1, HMG20B, CREB5, HMGA1, JUNB, DDIT3, ATF5, ATF3, JUN, IRF1, NFE2L2	0.000230953
GOTERM_BP_FAT	GO:0048514~blood vessel morphogenesis	13	TNFRSF12A, IL18, JAG1, ELK3, CITED1, JUNB, CITED2, GPI, BAX, JUN, HMOX1, CASP8, ERAP1	7.49037e-05
GOTERM_BP_FAT	GO:0045893~positive regulation of transcription, DNA-dependent	19	EGR1, CEBPB, MAP2K3, CREB5, SOX9, HMGA1, JUNB, BRCA1, CITED2, FOS, TNFRSF1A, JUN, IRF1, BCL3, NFE2L2, RUNX1, NFATC2, RUNX2, FOSL1	7.61722e-05
GOTERM_MF_FAT	GO:0030528~transcription regulator activity	36	FOSL2, EZH2, PDLIM1, ELK3, SOX9, CITED1, CITED2, FOS, BCL3, NFATC2, RUNX1, FOSL1, RUNX2, BATF3, EGR1, CEBPB, CREBZF, CEBPD, HCLS1, BRCA2, EN1, HMG20B, CREB5, IFI16, HMGA1, JUNB, BRCA1, DDIT3, ATF5, ATF3, NUP62, NAB2, JUN, HIVEP3, IRF1, NFE2L2	0.000207871
GOTERM_BP_FAT	GO:0051254~positive regulation of RNA metabolic process	19	EGR1, CEBPB, MAP2K3, CREB5, SOX9, HMGA1, JUNB, BRCA1, CITED2, FOS, TNFRSF1A, JUN, IRF1, BCL3, NFE2L2, RUNX1, NFATC2, RUNX2, FOSL1	8.37454e-05
GOTERM_BP_FAT	GO:0008624~induction of apoptosis by extracellular signals	10	CFLAR, CASP3, TNFRSF10B, BAX, CASP8, SORT1, DAP, FAS, NGFR, CASP2	8.66044e-05
GOTERM_BP_FAT	GO:0008633~activation of pro-apoptotic gene products	6	TRAF2, TNFRSF10B, RIPK1, CASP8, FAS, TRADD	9.35048e-05
GOTERM_MF_FAT	GO:0043565~sequence-specific DNA binding	21	EGR1, BATF3, CEBPB, FOSL2, CREBZF, CEBPD, CREB5, EN1, ELK3, SOX9, HMGA1, JUNB, DDIT3, ATF5, FOS, ATF3, JUN, IRF1, NFE2L2, NFATC2, FOSL1	0.000257796
GOTERM_BP_FAT	GO:0007249~I-kappaB kinase/NF-kappaB cascade	8	TRAF2, TNFRSF10B, RIPK1, PRDX4, BCL3, TIFA, MALT1, FAF1	0.000133495
GOTERM_BP_FAT	GO:0048545~response to steroid hormone stimulus	12	CASP6, FOS, PLA2G4A, CCL2, HMOX1, BRCA2, FAS, GAL, FOSL1, BRCA1, JUNB, CITED1	0.000167079
GOTERM_BP_FAT	GO:0042127~regulation of cell proliferation	24	CCL2, FOSL2, HCLS1, IL18, BRCA2, TTK, TNFRSF14, CD40, JAG1, GAL, SOX9, BRCA1, CASP3, PLA2G4A, ATF3, NUP62, HMOX1, JUN, F3, BAX, SCIN, NGFR, RUNX2, FOSL1	0.000178659
GOTERM_CC_FAT	GO:0031264~death-inducing signaling complex	4	RIPK1, CASP8, FAF1, FAS	0.000211497
GOTERM_BP_FAT	GO:0006281~DNA repair	14	MSH6, USP1, BRCA2, BRIP1, BCCIP, RAD54L, BRCA1, RBBP8, RAD51, RECQL, FANCD2, H2AFX, TOP2A, BARD1	0.000252903
GOTERM_BP_FAT	GO:0051726~regulation of cell cycle	15	BRCA2, TTK, BRIP1, BCCIP, CENPE, BRCA1, JUNB, RBBP8, CITED2, CASP3, JUN, BAX, H2AFX, NGFR, FOSL1	0.000268864
GOTERM_BP_FAT	GO:0051240~positive regulation of multicellular organismal process	13	TRAF2, CCL2, IL18, MALT1, CD40, TPM1, TRADD, PLA2G4A, BAX, F3, HMOX1, BCL3, CASP1	0.000269717
GOTERM_BP_FAT	GO:0001568~blood vessel development	13	TNFRSF12A, IL18, JAG1, ELK3, CITED1, JUNB, CITED2, GPI, BAX, JUN, HMOX1, CASP8, ERAP1	0.000275736
GOTERM_CC_FAT	GO:0005856~cytoskeleton	29	TRIOBP, PDLIM7, LMNB1, VIM, AKAP12, TTK, IGF2BP2, PDLIM1, TPM2, TPM1, IQGAP1, TUBB, PPL, CASP8, TUBB6, MSN, TOP2A, HAP1, FSCN1, KIF15, BRCA2, PTPN13, CENPE, BRCA1, TRADD, NUP62, IFT57, SCIN, TNFAIP3	0.000277289
GOTERM_MF_FAT	GO:0046983~protein dimerization activity	19	BATF3, CEBPB, FOSL2, MCL1, CEBPD, CREB5, JUNB, STK3, DDIT3, ATF5, FOS, ATF3, JUN, BAX, NFE2L2, RUNX1, TOP2A, FOSL1, BARD1	0.000607059
GOTERM_BP_FAT	GO:0051252~regulation of RNA metabolic process	39	FOSL2, EZH2, ELK3, SOX9, CITED1, CITED2, TNFRSF1A, FOS, HMOX1, BCL3, NFATC2, RUNX1, FOSL1, RUNX2, BATF3, EGR1, CEBPB, CREBZF, CEBPD, MAP2K3, HCLS1, BRIP1, BRCA2, EN1, HMG20B, CREB5, IFI16, HMGA1, JUNB, BRCA1, DDIT3, RBBP8, ATF5, ATF3, JUN, SERBP1, IRF1, NFE2L2, BARD1	0.00030757
GOTERM_BP_FAT	GO:0001944~vasculature development	13	TNFRSF12A, IL18, JAG1, ELK3, CITED1, JUNB, CITED2, GPI, BAX, JUN, HMOX1, CASP8, ERAP1	0.0003391
GOTERM_BP_FAT	GO:0000302~response to reactive oxygen species	8	CASP6, FOS, PLA2G4A, HMOX1, JUN, TPM1, FOSL1, DDIT3	0.000361499
GOTERM_MF_FAT	GO:0008234~cysteine-type peptidase activity	10	CASP6, CFLAR, CASP3, CASP4, USP1, CASP8, MALT1, TNFAIP3, CASP1, CASP2	0.000734481
GOTERM_CC_FAT	GO:0005829~cytosol	28	BCAT1, TRAF2, VIM, CASP6, CASP3, TUBB, HMOX1, CASP8, ERAP1, FAS, HSPA5, NFATC2, CASP2, FOSL1, CDCA3, GLRX, NOL3, MALT1, HMGA1, TRADD, PLA2G4A, JUN, BAX, RIPK1, RRM1, NFE2L2, FAF1, NGFR	0.000359321
GOTERM_MF_FAT	GO:0003677~DNA binding	45	FOSL2, EZH2, ELK3, SOX9, CITED1, CITED2, FOS, HIST1H2BJ, BCL3, H2AFX, NFATC2, RUNX1, FOSL1, RUNX2, TOP2A, BATF3, EGR1, MSH6, HIST1H2BC, CEBPB, CREBZF, CEBPD, HCLS1, KIF15, BRIP1, BRCA2, EN1, HMG20B, CREB5, IFI16, HMGA1, RAD54L, JUNB, BRCA1, DDIT3, RAD51, RECQL, ATF5, ATF3, JUN, IFT57, HIVEP3, IRF1, NFE2L2, TNFAIP3	0.000690095
GOTERM_BP_FAT	GO:0001817~regulation of cytokine production	11	TRAF2, CEBPB, HMOX1, IL18, MAP2K3, IRF1, BCL3, MALT1, IGF2BP2, CD40, CASP1	0.000530591
GOTERM_BP_FAT	GO:0042770~DNA damage response, signal transduction	8	MSH6, HMOX1, BRIP1, BCL3, BRCA2, H2AFX, IFI16, BRCA1	0.00053492
GOTERM_BP_FAT	GO:0009719~response to endogenous stimulus	16	CCL2, HCLS1, BRCA2, GAL, DDIT3, CITED1, BRCA1, JUNB, FOS, CASP6, PLA2G4A, NUP62, HMOX1, SORT1, FAS, FOSL1	0.000528197
GOTERM_BP_FAT	GO:0008630~DNA damage response, signal transduction resulting in induction of apoptosis	6	MSH6, HMOX1, BCL3, BRCA2, IFI16, BRCA1	0.000586791
GOTERM_MF_FAT	GO:0019899~enzyme binding	18	TRIOBP, VIM, CENPE, CD40, HMGA1, IQGAP1, BRCA1, TRADD, HMOX1, F3, SORT1, H2AFX, FAF1, FAS, KPNA2, TOP2A, CASP2, BARD1	0.000905863
GOTERM_BP_FAT	GO:0051052~regulation of DNA metabolic process	9	MSH6, USP1, JUN, BRCA2, H2AFX, CD40, KPNA2, BRCA1, RAD51	0.000643054
GOTERM_BP_FAT	GO:0009266~response to temperature stimulus	8	CASP6, FOS, PLA2G4A, CCL2, IL18, HSPA4, ERO1L, NGFR	0.000636755
GOTERM_BP_FAT	GO:0009725~response to hormone stimulus	15	CCL2, HCLS1, BRCA2, GAL, CITED1, BRCA1, JUNB, FOS, CASP6, PLA2G4A, NUP62, HMOX1, SORT1, FAS, FOSL1	0.000690609
GOTERM_BP_FAT	GO:0007243~protein kinase cascade	15	TRAF2, CCL2, MAP2K3, DUSP10, PRDX4, TIFA, MALT1, STK3, DUSP4, TNFRSF10B, HMOX1, RIPK1, BCL3, TNFRSF19, FAF1	0.000743508
GOTERM_BP_FAT	GO:0002520~immune system development	13	EGR1, MSH6, HCLS1, BRCA2, MALT1, IFI16, JAG1, BAX, CASP8, IRF1, BCL3, FAS, RUNX1	0.000736534
GOTERM_BP_FAT	GO:0009617~response to bacterium	11	TNFRSF1A, FOS, HIST1H2BC, PLA2G4A, CCL2, THBD, JUN, HIST1H2BJ, ERAP1, BCL3, MALT1	0.000795122
GOTERM_BP_FAT	GO:0009611~response to wounding	18	CCL2, CEBPB, C3, MAP2K3, ELK3, CD40, GAL, TPM1, CASP6, FOS, TNFRSF1A, CASP3, THBD, HMOX1, F3, BAX, NGFR, GAP43	0.000796386
GOTERM_BP_FAT	GO:0030097~hemopoiesis	12	EGR1, HCLS1, BAX, CASP8, IRF1, BCL3, BRCA2, MALT1, FAS, JAG1, IFI16, RUNX1	0.000816602
GOTERM_BP_FAT	GO:0006355~regulation of transcription, DNA-dependent	37	FOSL2, EZH2, ELK3, SOX9, CITED1, CITED2, TNFRSF1A, FOS, HMOX1, BCL3, NFATC2, RUNX1, FOSL1, RUNX2, BATF3, EGR1, CEBPB, CREBZF, CEBPD, MAP2K3, HCLS1, BRIP1, BRCA2, EN1, HMG20B, CREB5, IFI16, HMGA1, JUNB, BRCA1, DDIT3, RBBP8, ATF5, ATF3, JUN, IRF1, NFE2L2	0.000892653
GOTERM_BP_FAT	GO:0000725~recombinational repair	5	BRCA2, H2AFX, RAD54L, BRCA1, RAD51	0.000917626
GOTERM_BP_FAT	GO:0000724~double-strand break repair via homologous recombination	5	BRCA2, H2AFX, RAD54L, BRCA1, RAD51	0.000917626
GOTERM_BP_FAT	GO:0006302~double-strand break repair	7	RECQL, BRIP1, BRCA2, H2AFX, RAD54L, BRCA1, RAD51	0.000997398
GOTERM_CC_FAT	GO:0005654~nucleoplasm	21	MCL1, USP1, EZH2, BRCA2, PDLIM1, IFI16, HMGA1, BRCA1, RAD51, CASP6, DUSP4, ATF5, FOS, CASP3, FANCD2, JUN, H2AFX, NGFR, KPNA2, TOP2A, RUNX2	0.00115508
GOTERM_BP_FAT	GO:0006357~regulation of transcription from RNA polymerase II promoter	21	EGR1, CEBPB, FOSL2, BRIP1, SOX9, JUNB, BRCA1, CITED1, RBBP8, CITED2, ATF5, FOS, TNFRSF1A, HMOX1, JUN, IRF1, BCL3, RUNX1, NFATC2, RUNX2, FOSL1	0.00126819
GOTERM_MF_FAT	GO:0005031~tumor necrosis factor receptor activity	4	TNFRSF1A, EDA2R, TNFRSF19, TNFRSF14	0.00203645
GOTERM_MF_FAT	GO:0003690~double-stranded DNA binding	8	EGR1, RECQL, FOS, MSH6, JUN, IFI16, JUNB, RAD51	0.00190229
GOTERM_BP_FAT	GO:0022402~cell cycle process	18	BCAT1, MSH6, MKI67, KIF15, BRCA2, TTK, CENPE, RAD54L, DDIT3, BRCA1, RBBP8, RAD51, TUBB, FANCD2, H2AFX, KPNA2, CDCA3, BARD1	0.00162079
GOTERM_MF_FAT	GO:0016563~transcription activator activity	15	EGR1, CEBPB, BRCA2, PDLIM1, SOX9, HMGA1, JUNB, BRCA1, CITED2, HIVEP3, NFE2L2, RUNX1, NFATC2, RUNX2, FOSL1	0.00217787
GOTERM_BP_FAT	GO:0048534~hemopoietic or lymphoid organ development	12	EGR1, HCLS1, BAX, CASP8, IRF1, BCL3, BRCA2, MALT1, FAS, JAG1, IFI16, RUNX1	0.00180332
GOTERM_BP_FAT	GO:0010332~response to gamma radiation	5	CASP6, CCL2, FANCD2, BAX, BRCA2	0.00189244
GOTERM_MF_FAT	GO:0043120~tumor necrosis factor binding	4	TNFRSF1A, EDA2R, TNFRSF19, TNFRSF14	0.00227373
GOTERM_BP_FAT	GO:0042325~regulation of phosphorylation	16	TRAF2, HCLS1, MAP2K3, TTK, MALT1, CENPE, TNFRSF14, BCCIP, CASP3, TNFRSF10B, NUP62, BAX, RIPK1, JUN, GAP43, BARD1	0.00203457
GOTERM_BP_FAT	GO:0022403~cell cycle phase	15	BCAT1, MSH6, MKI67, KIF15, BRCA2, TTK, CENPE, RAD54L, RBBP8, RAD51, TUBB, FANCD2, H2AFX, KPNA2, CDCA3	0.00207673
KEGG_PATHWAY	hsa04010:MAPK signaling pathway	14	TRAF2, MAP2K3, DUSP10, DDIT3, STK3, FOS, TNFRSF1A, DUSP4, PLA2G4A, CASP3, JUN, HSPA6, FAS, NFATC2	0.00456997
GOTERM_BP_FAT	GO:0006310~DNA recombination	8	RECQL, MSH6, BRCA2, H2AFX, RAD54L, HMGA1, BRCA1, RAD51	0.00229099
GOTERM_MF_FAT	GO:0043566~structure-specific DNA binding	9	EGR1, RECQL, FOS, MSH6, JUN, BRCA2, IFI16, JUNB, RAD51	0.00291052
GOTERM_BP_FAT	GO:0051789~response to protein stimulus	8	EGR1, FOS, HSPA6, HSPA4, NFE2L2, ERO1L, FAS, DDIT3	0.00254701
GOTERM_BP_FAT	GO:0045944~positive regulation of transcription from RNA polymerase II promoter	14	EGR1, CEBPB, SOX9, JUNB, CITED2, FOS, TNFRSF1A, JUN, IRF1, BCL3, RUNX1, NFATC2, RUNX2, FOSL1	0.00252649
GOTERM_BP_FAT	GO:0051174~regulation of phosphorus metabolic process	16	TRAF2, HCLS1, MAP2K3, TTK, MALT1, CENPE, TNFRSF14, BCCIP, CASP3, TNFRSF10B, NUP62, BAX, RIPK1, JUN, GAP43, BARD1	0.00296745
GOTERM_BP_FAT	GO:0019220~regulation of phosphate metabolic process	16	TRAF2, HCLS1, MAP2K3, TTK, MALT1, CENPE, TNFRSF14, BCCIP, CASP3, TNFRSF10B, NUP62, BAX, RIPK1, JUN, GAP43, BARD1	0.00296745
GOTERM_BP_FAT	GO:0001525~angiogenesis	9	GPI, TNFRSF12A, HMOX1, JUN, IL18, CASP8, ERAP1, ELK3, JAG1	0.00304138
GOTERM_CC_FAT	GO:0005694~chromosome	14	MSH6, HIST1H2BC, MKI67, CENPE, HMGA1, BRCA1, JUNB, RAD51, CITED2, FANCD2, JUN, HIST1H2BJ, H2AFX, TOP2A	0.00305902
GOTERM_BP_FAT	GO:0000279~M phase	13	MSH6, MKI67, KIF15, BRCA2, TTK, CENPE, RAD54L, RAD51, TUBB, FANCD2, H2AFX, KPNA2, CDCA3	0.00309653
GOTERM_BP_FAT	GO:0065003~macromolecular complex assembly	19	TRAF2, HIST1H2BC, MALT1, CENPE, CD40, BIRC3, HMGA1, RAD51, TNFRSF1A, TUBB, BAX, ALOX5AP, RRM1, HIST1H2BJ, CASP8, TUBB6, HSPA4, H2AFX, FAS	0.00325188
GOTERM_BP_FAT	GO:0070271~protein complex biogenesis	16	TRAF2, MALT1, CENPE, CD40, BIRC3, HMGA1, RAD51, TNFRSF1A, TUBB, BAX, ALOX5AP, CASP8, RRM1, TUBB6, HSPA4, FAS	0.00438546
GOTERM_BP_FAT	GO:0006461~protein complex assembly	16	TRAF2, MALT1, CENPE, CD40, BIRC3, HMGA1, RAD51, TNFRSF1A, TUBB, BAX, ALOX5AP, CASP8, RRM1, TUBB6, HSPA4, FAS	0.00438546
GOTERM_MF_FAT	GO:0008134~transcription factor binding	16	BATF3, PDLIM1, ELK3, HMGA1, DDIT3, BRCA1, JUNB, CITED2, ATF5, ATF3, NUP62, NAB2, JUN, BCL3, FAF1, RUNX1	0.00523462
GOTERM_BP_FAT	GO:0002237~response to molecule of bacterial origin	7	TNFRSF1A, FOS, PLA2G4A, CCL2, THBD, JUN, MALT1	0.00512551
GOTERM_BP_FAT	GO:0042542~response to hydrogen peroxide	6	CASP6, PLA2G4A, HMOX1, JUN, FOSL1, DDIT3	0.00534939
GOTERM_CC_FAT	GO:0005730~nucleolus	17	FOSL2, NOL3, EXOSC9, MKI67, ELK3, IFI16, SOX9, IQGAP1, JUNB, FOS, CASP3, ATF3, NUP62, HMOX1, CASP8, MSN, TOP2A	0.00521617
GOTERM_BP_FAT	GO:0006979~response to oxidative stress	9	CASP6, FOS, PLA2G4A, HMOX1, JUN, PDLIM1, TPM1, FOSL1, DDIT3	0.00571017
GOTERM_BP_FAT	GO:0045449~regulation of transcription	45	FOSL2, EZH2, PDLIM1, ELK3, SOX9, CITED1, CITED2, TNFRSF1A, FOS, HMOX1, BCL3, NFATC2, RUNX1, FOSL1, RUNX2, BATF3, EGR1, CEBPB, CREBZF, CEBPD, MAP2K3, HCLS1, BRIP1, EDA2R, BRCA2, MALT1, EN1, HMG20B, CREB5, IFI16, HMGA1, JUNB, BRCA1, DDIT3, RBBP8, ATF5, ATF3, NUP62, NAB2, JUN, IFT57, RIPK1, HIVEP3, IRF1, NFE2L2	0.00599307
GOTERM_BP_FAT	GO:0002694~regulation of leukocyte activation	9	TRAF2, CASP3, HMOX1, IL18, MALT1, TNFRSF14, FAS, CD40, GAL	0.00605756
GOTERM_BP_FAT	GO:0009411~response to UV	6	MSH6, CASP3, USP1, BAX, BCL3, BRCA2	0.00653284
GOTERM_BP_FAT	GO:0043933~macromolecular complex subunit organization	19	TRAF2, HIST1H2BC, MALT1, CENPE, CD40, BIRC3, HMGA1, RAD51, TNFRSF1A, TUBB, BAX, ALOX5AP, RRM1, HIST1H2BJ, CASP8, TUBB6, HSPA4, H2AFX, FAS	0.00659341
GOTERM_BP_FAT	GO:0007049~cell cycle	20	BCAT1, MSH6, MKI67, KIF15, BRCA2, TTK, HMG20B, BCCIP, CENPE, RAD54L, DDIT3, BRCA1, RBBP8, RAD51, TUBB, FANCD2, H2AFX, KPNA2, CDCA3, BARD1	0.00683729
GOTERM_BP_FAT	GO:0002521~leukocyte differentiation	8	EGR1, BAX, CASP8, IRF1, BCL3, MALT1, FAS, IFI16	0.0074388
GOTERM_BP_FAT	GO:0051259~protein oligomerization	9	TNFRSF1A, ALOX5AP, BAX, RRM1, CASP8, MALT1, FAS, BIRC3, RAD51	0.00785998
GOTERM_BP_FAT	GO:0050865~regulation of cell activation	9	TRAF2, CASP3, HMOX1, IL18, MALT1, TNFRSF14, FAS, CD40, GAL	0.00807947
GOTERM_BP_FAT	GO:0051327~M phase of meiotic cell cycle	7	MSH6, MKI67, FANCD2, BRCA2, H2AFX, RAD54L, RAD51	0.00917162
GOTERM_BP_FAT	GO:0007126~meiosis	7	MSH6, MKI67, FANCD2, BRCA2, H2AFX, RAD54L, RAD51	0.00917162
GOTERM_BP_FAT	GO:0009416~response to light stimulus	8	FOS, MSH6, CASP3, USP1, BAX, BCL3, BRCA2, JUNB	0.00974648
GOTERM_BP_FAT	GO:0051321~meiotic cell cycle	7	MSH6, MKI67, FANCD2, BRCA2, H2AFX, RAD54L, RAD51	0.0100019
GOTERM_BP_FAT	GO:0006952~defense response	17	HIST1H2BC, CCL2, CEBPB, C3, MAP2K3, MALT1, CD40, GAL, CASP6, FOS, TNFRSF1A, TUBB, HMOX1, F3, HIST1H2BJ, BCL3, FOSL1	0.00994775
GOTERM_BP_FAT	GO:0045896~regulation of transcription, mitotic	3	FOSL1, JUNB, CITED2	0.0106556
GOTERM_MF_FAT	GO:0003714~transcription corepressor activity	8	BATF3, ATF5, ATF3, NAB2, ELK3, JUNB, DDIT3, CITED2	0.0151395
GOTERM_BP_FAT	GO:0051249~regulation of lymphocyte activation	8	TRAF2, CASP3, IL18, MALT1, TNFRSF14, FAS, CD40, GAL	0.0141604
GOTERM_BP_FAT	GO:0051591~response to cAMP	5	FOS, THBD, JUN, FOSL1, JUNB	0.0148294
GOTERM_BP_FAT	GO:0007568~aging	7	FOS, MSH6, PLA2G4A, NUP62, JUN, BRCA2, DDIT3	0.0156855
GOTERM_BP_FAT	GO:0042035~regulation of cytokine biosynthetic process	6	CEBPB, HMOX1, MAP2K3, IRF1, BCL3, IGF2BP2	0.0160146
GOTERM_MF_FAT	GO:0070513~death domain binding	3	RIPK1, BAX, TRADD	0.0205979
GOTERM_BP_FAT	GO:0051098~regulation of binding	8	CREBZF, HMOX1, RIPK1, BAX, BCL3, EDA2R, MALT1, DDIT3	0.016528
GOTERM_BP_FAT	GO:0046649~lymphocyte activation	9	EGR1, MSH6, BAX, IRF1, BCL3, MALT1, FAS, CD40, DDOST	0.0167483
GOTERM_BP_FAT	GO:0032570~response to progesterone stimulus	4	FOS, CCL2, FOSL1, JUNB	0.0170369
GOTERM_BP_FAT	GO:0008284~positive regulation of cell proliferation	13	CCL2, FOSL2, IL18, HCLS1, TTK, CD40, PLA2G4A, ATF3, F3, JUN, NGFR, RUNX2, FOSL1	0.0182944
GOTERM_BP_FAT	GO:0032496~response to lipopolysaccharide	6	TNFRSF1A, FOS, PLA2G4A, CCL2, THBD, JUN	0.0182679
GOTERM_BP_FAT	GO:0051384~response to glucocorticoid stimulus	6	FOS, PLA2G4A, CCL2, FAS, FOSL1, JUNB	0.019176
GOTERM_MF_FAT	GO:0016564~transcription repressor activity	11	BATF3, ATF5, ATF3, CREBZF, NAB2, EZH2, ELK3, IFI16, JUNB, DDIT3, CITED2	0.027627
GOTERM_BP_FAT	GO:0060395~SMAD protein signal transduction	3	FOS, JUN, CITED1	0.0235333
GOTERM_BP_FAT	GO:0051101~regulation of DNA binding	7	CREBZF, HMOX1, RIPK1, BCL3, EDA2R, MALT1, DDIT3	0.0235273
GOTERM_CC_FAT	GO:0000785~chromatin	8	MSH6, HIST1H2BC, JUN, HIST1H2BJ, H2AFX, HMGA1, JUNB, CITED2	0.0280913
GOTERM_BP_FAT	GO:0008283~cell proliferation	13	BCAT1, TSPO, MKI67, FSCN1, KIF15, BRCA2, MALT1, IFI16, CD40, CITED1, BAX, HMOX1, NAB2	0.0269822
GOTERM_BP_FAT	GO:0031960~response to corticosteroid stimulus	6	FOS, PLA2G4A, CCL2, FAS, FOSL1, JUNB	0.0270504
GOTERM_BP_FAT	GO:0001892~embryonic placenta development	4	CEBPB, JUNB, CITED1, CITED2	0.027181
GOTERM_BP_FAT	GO:0042110~T cell activation	7	EGR1, BAX, IRF1, BCL3, MALT1, FAS, DDOST	0.0278652
GOTERM_BP_FAT	GO:0006954~inflammatory response	11	TNFRSF1A, CASP6, FOS, CEBPB, CCL2, C3, HMOX1, F3, MAP2K3, CD40, GAL	0.0280678
KEGG_PATHWAY	hsa04621:NOD-like receptor signaling pathway	6	CCL2, IL18, CASP8, TNFAIP3, CASP1, BIRC3	0.0570014
GOTERM_BP_FAT	GO:0009991~response to extracellular stimulus	9	FOS, PLA2G4A, CCL2, HMOX1, JUN, BRCA2, HSPA5, FOSL1, DDIT3	0.0282931
GOTERM_BP_FAT	GO:0007242~intracellular signaling cascade	25	TRAF2, CCL2, PRDX4, DUSP10, IQGAP1, HMOX1, BCL3, TNFRSF19, H2AFX, TOP2A, MSH6, HCLS1, MAP2K3, BRCA2, TIFA, BRIP1, MALT1, IFI16, BRCA1, STK3, DUSP4, TNFRSF10B, NUP62, RIPK1, FAF1	0.0301099
GOTERM_BP_FAT	GO:0030330~DNA damage response, signal transduction by p53 class mediator	4	BCL3, BRCA2, IFI16, BRCA1	0.0328754
GOTERM_BP_FAT	GO:0045766~positive regulation of angiogenesis	4	TNFRSF1A, F3, ERAP1, RUNX1	0.0328754
GOTERM_BP_FAT	GO:0001819~positive regulation of cytokine production	6	TRAF2, IL18, BCL3, MALT1, CD40, CASP1	0.0326956
GOTERM_BP_FAT	GO:0000075~cell cycle checkpoint	6	BRIP1, TTK, H2AFX, CENPE, BRCA1, RBBP8	0.0340131
GOTERM_BP_FAT	GO:0045597~positive regulation of cell differentiation	9	PDLIM7, TNFRSF12A, JUN, SCIN, NGFR, JAG1, RUNX1, RUNX2, JUNB	0.0347162
GOTERM_BP_FAT	GO:0001666~response to hypoxia	7	NOL3, CCL2, HMOX1, IL18, PDLIM1, CASP1, CITED2	0.0354177
GOTERM_BP_FAT	GO:0051054~positive regulation of DNA metabolic process	5	JUN, H2AFX, CD40, BRCA1, RAD51	0.0352054
GOTERM_BP_FAT	GO:0009612~response to mechanical stimulus	5	FOS, CCL2, JUN, FOSL1, JUNB	0.0352054
GOTERM_BP_FAT	GO:0002695~negative regulation of leukocyte activation	5	CASP3, HMOX1, TNFRSF14, FAS, GAL	0.0372308
GOTERM_CC_FAT	GO:0044430~cytoskeletal part	18	PDLIM7, LMNB1, KIF15, VIM, BRCA2, TTK, IGF2BP2, CENPE, TPM2, TPM1, BRCA1, IQGAP1, TUBB, NUP62, IFT57, TUBB6, TNFAIP3, TOP2A	0.0447868
GOTERM_BP_FAT	GO:0048584~positive regulation of response to stimulus	9	TRAF2, TNFRSF1A, PLA2G4A, C3, F3, EDA2R, MALT1, H2AFX, BRCA1	0.0403455
GOTERM_BP_FAT	GO:0070482~response to oxygen levels	7	NOL3, CCL2, HMOX1, IL18, PDLIM1, CASP1, CITED2	0.0440105
GOTERM_BP_FAT	GO:0001890~placenta development	5	PLA2G4A, CEBPB, JUNB, CITED1, CITED2	0.0437076
GOTERM_BP_FAT	GO:0007179~transforming growth factor beta receptor signaling pathway	5	FOS, CCL2, JUN, GDF15, CITED1	0.0437076
GOTERM_BP_FAT	GO:0045321~leukocyte activation	9	EGR1, MSH6, BAX, IRF1, BCL3, MALT1, FAS, CD40, DDOST	0.0458007
GOTERM_BP_FAT	GO:0050866~negative regulation of cell activation	5	CASP3, HMOX1, TNFRSF14, FAS, GAL	0.0456574
GOTERM_BP_FAT	GO:0002703~regulation of leukocyte mediated immunity	5	TRAF2, C3, HMOX1, MALT1, CD40	0.0456574
GOTERM_MF_FAT	GO:0003712~transcription cofactor activity	11	BATF3, ATF5, ATF3, NAB2, PDLIM1, ELK3, HMGA1, BRCA1, JUNB, DDIT3, CITED2	0.0698068
GOTERM_BP_FAT	GO:0045765~regulation of angiogenesis	5	TNFRSF1A, HMOX1, F3, ERAP1, RUNX1	0.0507866
GOTERM_BP_FAT	GO:0030098~lymphocyte differentiation	6	EGR1, BAX, IRF1, BCL3, MALT1, FAS	0.0527942
GOTERM_BP_FAT	GO:0051090~regulation of transcription factor activity	6	CREBZF, HMOX1, RIPK1, EDA2R, MALT1, DDIT3	0.0527942
GOTERM_BP_FAT	GO:0031668~cellular response to extracellular stimulus	5	FOS, HMOX1, JUN, HSPA5, FOSL1	0.052893
KEGG_PATHWAY	hsa04060:Cytokine-cytokine receptor interaction	11	TNFRSF1A, TNFRSF10B, CCL2, TNFRSF12A, IL18, EDA2R, TNFRSF19, TNFRSF14, FAS, NGFR, CD40	0.0932111
GOTERM_BP_FAT	GO:0043627~response to estrogen stimulus	6	CASP6, HMOX1, BRCA2, GAL, BRCA1, CITED1	0.0563506
GOTERM_BP_FAT	GO:0007017~microtubule-based process	9	TUBB, KIF15, TUBB6, BRCA2, TTK, CENPE, KPNA2, HAP1, BRCA1	0.0568866
GOTERM_BP_FAT	GO:0045639~positive regulation of myeloid cell differentiation	4	JUN, SCIN, JAG1, RUNX1	0.056705
GOTERM_BP_FAT	GO:0034976~response to endoplasmic reticulum stress	4	NFE2L2, ERO1L, HSPA5, DDIT3	0.0611521
GOTERM_BP_FAT	GO:0010035~response to inorganic substance	8	CASP6, FOS, PLA2G4A, HMOX1, JUN, TPM1, FOSL1, DDIT3	0.0632649
GOTERM_BP_FAT	GO:0006984~ER-nuclear signaling pathway	4	NFE2L2, ERO1L, HSPA5, DDIT3	0.0653102
GOTERM_BP_FAT	GO:0007565~female pregnancy	6	FOS, PLA2G4A, THBD, FOSL1, JUNB, CITED2	0.0653844
GOTERM_CC_FAT	GO:0044427~chromosomal part	10	MSH6, HIST1H2BC, MKI67, JUN, HIST1H2BJ, H2AFX, CENPE, HMGA1, JUNB, CITED2	0.0832165
GOTERM_BP_FAT	GO:0002449~lymphocyte mediated immunity	5	MSH6, TUBB, C3, BCL3, FAS	0.0682087
GOTERM_BP_FAT	GO:0045637~regulation of myeloid cell differentiation	5	JUN, SCIN, FAS, JAG1, RUNX1	0.0682087
GOTERM_BP_FAT	GO:0006986~response to unfolded protein	5	HSPA6, HSPA4, NFE2L2, ERO1L, DDIT3	0.0711143
GOTERM_BP_FAT	GO:0045767~regulation of anti-apoptosis	4	HMOX1, RIPK1, SERBP1, BAX	0.0794868
GOTERM_BP_FAT	GO:0042493~response to drug	8	FOS, CCL2, JUN, GAL, RAD54L, FOSL1, JUNB, DDIT3	0.0795203
GOTERM_BP_FAT	GO:0043009~chordate embryonic development	10	CEBPB, CASP8, BRCA2, EN1, TPM1, BRCA1, JUNB, CITED1, CITED2, RBBP8	0.0815155
GOTERM_BP_FAT	GO:0009792~embryonic development ending in birth or egg hatching	10	CEBPB, CASP8, BRCA2, EN1, TPM1, BRCA1, JUNB, CITED1, CITED2, RBBP8	0.0855039
GOTERM_BP_FAT	GO:0046697~decidualization	3	PLA2G4A, JUNB, CITED2	0.0850342
GOTERM_BP_FAT	GO:0007250~activation of NF-kappaB-inducing kinase activity	3	TRAF2, TNFRSF10B, MALT1	0.0850342
GOTERM_BP_FAT	GO:0034612~response to tumor necrosis factor	3	CASP3, RIPK1, CASP8	0.0850342
GOTERM_BP_FAT	GO:0042113~B cell activation	5	MSH6, BAX, BCL3, MALT1, CD40	0.0860322
GOTERM_BP_FAT	GO:0002250~adaptive immune response	5	MSH6, C3, IL18, BCL3, FAS	0.0892958
GOTERM_BP_FAT	GO:0002460~adaptive immune response based on somatic recombination of immune receptors built from immunoglobulin superfamily domains	5	MSH6, C3, IL18, BCL3, FAS	0.0892958
GOTERM_BP_FAT	GO:0014070~response to organic cyclic substance	6	FOS, HMOX1, JUN, BRCA2, FOSL1, JUNB	0.0896567
GOTERM_BP_FAT	GO:0002700~regulation of production of molecular mediator of immune response	4	TRAF2, HMOX1, MALT1, CD40	0.0924807
GOTERM_BP_FAT	GO:0043281~regulation of caspase activity	5	TNFRSF10B, IFT57, F3, BAX, HSPA5	0.095406
GOTERM_BP_FAT	GO:0045859~regulation of protein kinase activity	10	TRAF2, CASP3, TNFRSF10B, NUP62, RIPK1, MAP2K3, MALT1, BCCIP, CENPE, GAP43	0.0991432

## Sheet: M3 down-regulated
Category	Term	Count	Genes	Benjamini (FDR)
GOTERM_CC_FAT	GO:0005886~plasma membrane	31	F2RL2, PARD3, CALY, SNAP91, ERBB4, SNX1, TAC1, KIT, EPHB1, ALCAM, CD47, ATP2B2, SYN1, SDPR, PDE4A, KCNQ2, NT5E, SNAP25, SLC1A1, PRKCA, GABRG2, BAIAP2, STXBP1, PRKCE, SHANK2, GRM5, PDGFRA, RGS7, ADD3, TSHR, SH3GL2	8.35195e-06
GOTERM_CC_FAT	GO:0044459~plasma membrane part	24	F2RL2, GABRG2, PARD3, SNAP91, CALY, ERBB4, SNX1, KIT, SHANK2, EPHB1, ALCAM, GRM5, CD47, ATP2B2, SYN1, PDE4A, SDPR, PDGFRA, RGS7, KCNQ2, SNAP25, TSHR, SLC1A1, ADD3	4.90484e-06
GOTERM_BP_FAT	GO:0048667~cell morphogenesis involved in neuron differentiation	9	PRKCA, ALCAM, ATP2B2, PARD3, BAIAP2, STXBP1, SNAP25, EPHB1, MYCBP2	0.000286127
GOTERM_BP_FAT	GO:0000904~cell morphogenesis involved in differentiation	9	PRKCA, ALCAM, ATP2B2, PARD3, BAIAP2, STXBP1, SNAP25, EPHB1, MYCBP2	0.000463102
GOTERM_BP_FAT	GO:0030182~neuron differentiation	11	PRKCA, ALCAM, ATP2B2, RET, PARD3, HES5, BAIAP2, STXBP1, SNAP25, EPHB1, MYCBP2	0.000322766
GOTERM_BP_FAT	GO:0048666~neuron development	10	PRKCA, ALCAM, ATP2B2, RET, PARD3, BAIAP2, STXBP1, SNAP25, EPHB1, MYCBP2	0.000262736
GOTERM_BP_FAT	GO:0007409~axonogenesis	8	PRKCA, ALCAM, PARD3, BAIAP2, STXBP1, SNAP25, EPHB1, MYCBP2	0.000485009
GOTERM_BP_FAT	GO:0032989~cellular component morphogenesis	10	PRKCA, ALCAM, ATP2B2, PARD3, BAIAP2, STXBP1, TTN, SNAP25, EPHB1, MYCBP2	0.000642483
GOTERM_BP_FAT	GO:0048812~neuron projection morphogenesis	8	PRKCA, ALCAM, PARD3, BAIAP2, STXBP1, SNAP25, EPHB1, MYCBP2	0.000665192
GOTERM_BP_FAT	GO:0007169~transmembrane receptor protein tyrosine kinase signaling pathway	8	RET, REPS2, ERBB4, BAIAP2, PDGFRA, KIT, EPHB1, PIK3R1	0.000810279
GOTERM_BP_FAT	GO:0007166~cell surface receptor linked signal transduction	19	F2RL2, GABRG2, REPS2, PARD3, RET, CALY, SMAD9, ERBB4, BAIAP2, TAC1, KIT, EPHB1, GRM5, CD47, SFRP2, PDGFRA, RGS7, TSHR, PIK3R1	0.000816369
GOTERM_BP_FAT	GO:0007167~enzyme linked receptor protein signaling pathway	9	RET, REPS2, SMAD9, ERBB4, BAIAP2, PDGFRA, KIT, EPHB1, PIK3R1	0.00112807
GOTERM_BP_FAT	GO:0048858~cell projection morphogenesis	8	PRKCA, ALCAM, PARD3, BAIAP2, STXBP1, SNAP25, EPHB1, MYCBP2	0.00105748
GOTERM_BP_FAT	GO:0040017~positive regulation of locomotion	6	PRKCA, ERBB4, PDGFRA, TAC1, KIT, PIK3R1	0.00119367
GOTERM_BP_FAT	GO:0000902~cell morphogenesis	9	PRKCA, ALCAM, ATP2B2, PARD3, BAIAP2, STXBP1, SNAP25, EPHB1, MYCBP2	0.00116043
GOTERM_BP_FAT	GO:0031175~neuron projection development	8	PRKCA, ALCAM, PARD3, BAIAP2, STXBP1, SNAP25, EPHB1, MYCBP2	0.00110446
GOTERM_BP_FAT	GO:0032990~cell part morphogenesis	8	PRKCA, ALCAM, PARD3, BAIAP2, STXBP1, SNAP25, EPHB1, MYCBP2	0.00110446
GOTERM_BP_FAT	GO:0007267~cell-cell signaling	11	PRKCA, GRM5, GABRG2, SYN1, CAMK2G, TAC1, KCNQ2, SLC1A1, TSHR, SNAP25, EPHB1	0.00105633
GOTERM_BP_FAT	GO:0030030~cell projection organization	9	PRKCA, ALCAM, ATP2B2, PARD3, BAIAP2, STXBP1, SNAP25, EPHB1, MYCBP2	0.00119743
GOTERM_BP_FAT	GO:0040012~regulation of locomotion	7	PRKCA, ERBB4, PDGFRA, TAC1, KIT, TSHR, PIK3R1	0.00183598
GOTERM_BP_FAT	GO:0007268~synaptic transmission	8	PRKCA, GRM5, GABRG2, SYN1, TAC1, KCNQ2, SLC1A1, SNAP25	0.0022734
GOTERM_MF_FAT	GO:0004714~transmembrane receptor protein tyrosine kinase activity	5	RET, ERBB4, PDGFRA, KIT, EPHB1	0.0143927
GOTERM_BP_FAT	GO:0051050~positive regulation of transport	7	PRKCA, ATP2B2, CALY, ERBB4, TAC1, SNAP25, PIK3R1	0.0037795
GOTERM_BP_FAT	GO:0019226~transmission of nerve impulse	8	PRKCA, GRM5, GABRG2, SYN1, TAC1, KCNQ2, SLC1A1, SNAP25	0.00561343
GOTERM_MF_FAT	GO:0004672~protein kinase activity	10	PRKCA, RET, ERBB4, PAK3, CAMK2G, PDGFRA, KIT, TTN, PRKCE, EPHB1	0.0140689
GOTERM_BP_FAT	GO:0046324~regulation of glucose import	4	PRKCA, PEA15, ERBB4, PIK3R1	0.00711967
GOTERM_BP_FAT	GO:0010827~regulation of glucose transport	4	PRKCA, PEA15, ERBB4, PIK3R1	0.00743571
GOTERM_BP_FAT	GO:0030335~positive regulation of cell migration	5	ERBB4, PDGFRA, TAC1, KIT, PIK3R1	0.00771947
GOTERM_BP_FAT	GO:0016310~phosphorylation	11	PRKCA, RET, ERBB4, PAK3, CAMK2G, PDGFRA, KIT, TTN, PRKCE, EPHB1, PIK3R1	0.00742516
GOTERM_MF_FAT	GO:0004713~protein tyrosine kinase activity	6	RET, ERBB4, PDGFRA, KIT, TTN, EPHB1	0.0145993
GOTERM_BP_FAT	GO:0006468~protein amino acid phosphorylation	10	PRKCA, RET, ERBB4, PAK3, CAMK2G, PDGFRA, KIT, TTN, PRKCE, EPHB1	0.00893414
GOTERM_BP_FAT	GO:0051272~positive regulation of cell motion	5	ERBB4, PDGFRA, TAC1, KIT, PIK3R1	0.00988018
KEGG_PATHWAY	hsa04020:Calcium signaling pathway	7	PRKCA, GRM5, ATP2B2, ERBB4, CAMK2G, PDGFRA, PLCB1	0.0262933
GOTERM_BP_FAT	GO:0051270~regulation of cell motion	6	PARD3, ERBB4, PDGFRA, TAC1, KIT, PIK3R1	0.0130925
GOTERM_BP_FAT	GO:0007611~learning or memory	5	PRKCA, TAC1, KIT, PLCB1, SNAP25	0.0147167
GOTERM_BP_FAT	GO:0007610~behavior	8	PRKCA, GABRG2, ATP2B2, TAC1, KIT, PLCB1, TSHR, SNAP25	0.0226789
GOTERM_BP_FAT	GO:0006796~phosphate metabolic process	11	PRKCA, RET, ERBB4, PAK3, CAMK2G, PDGFRA, KIT, TTN, PRKCE, EPHB1, PIK3R1	0.0278711
GOTERM_BP_FAT	GO:0006793~phosphorus metabolic process	11	PRKCA, RET, ERBB4, PAK3, CAMK2G, PDGFRA, KIT, TTN, PRKCE, EPHB1, PIK3R1	0.0278711
GOTERM_BP_FAT	GO:0050804~regulation of synaptic transmission	5	ATP2B2, ERBB4, STXBP1, TAC1, KIT	0.0283385
GOTERM_BP_FAT	GO:0021955~central nervous system neuron axonogenesis	3	PRKCA, EPHB1, MYCBP2	0.0298453
GOTERM_BP_FAT	GO:0044087~regulation of cellular component biogenesis	5	PRKCA, STXBP1, TAC1, KIT, SNAP25	0.0312108
GOTERM_BP_FAT	GO:0051969~regulation of transmission of nerve impulse	5	ATP2B2, ERBB4, STXBP1, TAC1, KIT	0.0343798
GOTERM_CC_FAT	GO:0045121~membrane raft	5	PRKCA, ERBB4, SDPR, SNAP25, EPHB1	0.061901
GOTERM_BP_FAT	GO:0032228~regulation of synaptic transmission, GABAergic	3	ERBB4, STXBP1, TAC1	0.0351079
KEGG_PATHWAY	hsa04012:ErbB signaling pathway	5	PRKCA, ERBB4, PAK3, CAMK2G, PIK3R1	0.0461859
GOTERM_BP_FAT	GO:0031644~regulation of neurological system process	5	ATP2B2, ERBB4, STXBP1, TAC1, KIT	0.0375731
GOTERM_CC_FAT	GO:0031226~intrinsic to plasma membrane	12	F2RL2, GRM5, CD47, GABRG2, PARD3, CALY, PDGFRA, KCNQ2, SLC1A1, TSHR, SNAP25, EPHB1	0.0635399
GOTERM_CC_FAT	GO:0042995~cell projection	9	ALCAM, ATP2B2, PARD3, BAIAP2, PDE4A, FBXO2, TAC1, SNAP25, MYCBP2	0.0561704
GOTERM_BP_FAT	GO:0008284~positive regulation of cell proliferation	7	PRKCA, CD47, ERBB4, PDGFRA, TAC1, KIT, TSHR	0.0504967
GOTERM_BP_FAT	GO:0030334~regulation of cell migration	5	ERBB4, PDGFRA, TAC1, KIT, PIK3R1	0.0508868
GOTERM_BP_FAT	GO:0051130~positive regulation of cellular component organization	5	PRKCA, CALY, TAC1, KIT, PIK3R1	0.0631834
GOTERM_BP_FAT	GO:0044057~regulation of system process	6	PRKCA, ATP2B2, ERBB4, STXBP1, TAC1, KIT	0.0698011
KEGG_PATHWAY	hsa04144:Endocytosis	6	RET, PARD3, ERBB4, PDGFRA, KIT, SH3GL2	0.0761683
GOTERM_BP_FAT	GO:0021700~developmental maturation	4	RET, ERBB4, HES5, STXBP1	0.0915754
GOTERM_BP_FAT	GO:0050877~neurological system process	11	PRKCA, GRM5, GABRG2, ATP2B2, SYN1, TAC1, KIT, PLCB1, KCNQ2, SLC1A1, SNAP25	0.09719
GOTERM_BP_FAT	GO:0021954~central nervous system neuron development	3	PRKCA, EPHB1, MYCBP2	0.0979077
KEGG_PATHWAY	hsa05214:Glioma	4	PRKCA, CAMK2G, PDGFRA, PIK3R1	0.0870294
KEGG_PATHWAY	hsa04720:Long-term potentiation	4	PRKCA, GRM5, CAMK2G, PLCB1	0.0862933

## Sheet: M3 up-regulated
Category	Term	Count	Genes	Benjamini (FDR)
KEGG_PATHWAY	hsa04512:ECM-receptor interaction	26	TNC, ITGB4, ITGB3, ITGB1, SDC2, CD44, COL6A3, COL6A2, COL6A1, THBS1, FN1, SPP1, COL4A2, COL4A1, HSPG2, ITGA2, ITGA3, ITGA4, COL5A2, COL5A1, LAMA4, CD36, ITGA5, ITGA7, COL1A2, COL1A1	4.80171e-24
KEGG_PATHWAY	hsa04510:Focal adhesion	33	CAV2, CAV1, TNC, ERBB2, ITGB4, ITGB3, ITGB1, PXN, COL6A3, COL6A2, COL6A1, SHC1, THBS1, EGF, FN1, SPP1, EGFR, COL4A2, COL4A1, MET, ITGA2, ITGA3, ITGA4, HGF, COL5A2, COL5A1, FLNA, LAMA4, ITGA5, ITGA7, COL1A2, PDGFRB, COL1A1	1.67698e-22
GOTERM_BP_FAT	GO:0007155~cell adhesion	41	TNC, ITGB4, NEDD9, ITGB2, ITGB3, CD151, ITGB1, CXCL12, PXN, LGALS3BP, CD44, CTGF, TGFBI, COL6A3, COL6A2, COL6A1, THBS1, NPHP1, SPP1, FN1, EGFR, ICAM1, F11R, COL13A1, HSPG2, FBLIM1, ITGA2, ITGA3, ITGA4, MYH9, COL5A1, EMILIN1, HES1, LAMA4, CD36, ITGA5, ITGA7, TGFB1I1, TRIP6, ADAM12, ADAM15	1.11861e-18
GOTERM_BP_FAT	GO:0022610~biological adhesion	41	TNC, ITGB4, NEDD9, ITGB2, ITGB3, CD151, ITGB1, CXCL12, PXN, LGALS3BP, CD44, CTGF, TGFBI, COL6A3, COL6A2, COL6A1, THBS1, NPHP1, SPP1, FN1, EGFR, ICAM1, F11R, COL13A1, HSPG2, FBLIM1, ITGA2, ITGA3, ITGA4, MYH9, COL5A1, EMILIN1, HES1, LAMA4, CD36, ITGA5, ITGA7, TGFB1I1, TRIP6, ADAM12, ADAM15	5.89316e-19
GOTERM_CC_FAT	GO:0031012~extracellular matrix	30	MMP9, TNC, ELN, DCN, MMP2, LGALS3BP, TNFRSF11B, CD44, CTGF, TGFBI, COL6A3, COL6A2, COL6A1, THBS1, FN1, COL4A2, COL4A1, COL13A1, LGALS1, HSPG2, SPARC, MMP14, COL5A2, COL5A1, EMILIN1, ANXA2, FBLN1, LAMA4, COL1A2, COL1A1	2.1759e-17
GOTERM_CC_FAT	GO:0005578~proteinaceous extracellular matrix	28	TNC, MMP9, ELN, DCN, MMP2, TNFRSF11B, LGALS3BP, CTGF, TGFBI, COL6A3, COL6A2, COL6A1, FN1, COL4A2, COL4A1, COL13A1, LGALS1, HSPG2, SPARC, MMP14, COL5A2, COL5A1, EMILIN1, ANXA2, FBLN1, LAMA4, COL1A2, COL1A1	2.18439e-16
GOTERM_CC_FAT	GO:0044421~extracellular region part	42	MMP9, TNC, ELN, DCN, MMP2, CXCL12, LGALS3BP, TNFRSF11B, CD44, CTGF, GSN, TGFBI, COL6A3, COL6A2, COL6A1, THBS1, EGF, SPP1, FN1, EGFR, PLAT, ICAM1, COL4A2, COL4A1, COL13A1, LGALS1, HSPG2, LGALS8, SERPING1, SPARC, MMP14, COL5A2, COL5A1, EMILIN1, ANXA2, LAMA4, FBLN1, COL1A2, COL1A1, IGFBP2, IGFBP3, IGFBP5	3.29901e-15
GOTERM_CC_FAT	GO:0005576~extracellular region	56	MMP9, MMP2, CXCL12, TNFRSF11B, CD44, CTGF, GSN, IL1RAP, TGFBI, SERPINE1, EGFR, ICAM1, SERPING1, MMP14, FLNA, PLAUR, CD163, COL1A2, CTSD, COL1A1, ADAM12, ERBB2, TNC, ELN, DCN, MDK, PCOLCE, LGALS3BP, COL6A3, COL6A2, COL6A1, EGF, THBS1, FN1, SPP1, PLAT, MUC1, P4HB, COL4A2, COL4A1, COL13A1, LGALS1, HSPG2, LGALS8, HGF, SPARC, COL5A2, COL5A1, ANXA2, EMILIN1, LAMA4, FBLN1, IGFBP2, IGFBP3, PLAU, IGFBP5	7.59615e-13
GOTERM_BP_FAT	GO:0009611~response to wounding	29	NMI, TNC, ERBB2, TLR2, ITGB2, ITGB3, MDK, CD44, CXCR4, GSN, CTGF, IL1RAP, SERPINE1, THBS1, FN1, SPP1, PLAT, F11R, LYN, ANXA1, ITGA2, SERPING1, COL5A1, STAT3, CD163, PLAUR, CD36, ITGA5, PLAU	1.26033e-11
GOTERM_CC_FAT	GO:0005886~plasma membrane	77	EFNA1, SUSD2, TLR2, CD151, MMP2, SDC2, CD44, CTGF, CXCR4, IL1RAP, SERPINE1, SHC1, PILRB, EGFR, ICAM1, F11R, IRS2, LYN, HLA-A, FBLIM1, MYH9, MMP14, FLNA, PLAUR, CD163, GRB10, CD36, COL1A2, PDGFRB, TGFB1I1, COL1A1, ADAM12, JAM3, GRB14, CAV2, CAV1, IL1R1, ERBB2, CALD1, ITGB4, NEDD9, ITGB2, ITGB3, ITGB1, PXN, COL6A3, CAMK2D, COL6A2, COL6A1, FCER1G, EGF, THBS1, NPHP1, FN1, MUC1, P4HB, COL13A1, MET, AN…	2.59481e-12
GOTERM_CC_FAT	GO:0008305~integrin complex	11	LYN, ITGA5, ITGA7, ITGB4, ITGA2, ITGB2, ITGA3, ITGB3, ITGA4, MYH9, ITGB1	2.94176e-12
GOTERM_MF_FAT	GO:0019838~growth factor binding	15	IL1R1, COL4A1, ERBB2, COL5A1, CD36, CTGF, IL1RAP, COL1A2, COL6A1, PDGFRB, COL1A1, THBS1, IGFBP2, IGFBP3, IGFBP5	1.21938e-10
GOTERM_BP_FAT	GO:0030198~extracellular matrix organization	15	COL4A2, MMP9, ELN, HSPG2, DCN, SERPINH1, COL5A2, COL5A1, ANXA2, EMILIN1, TNFRSF11B, TGFBI, COL1A2, COL6A2, COL1A1	1.96259e-10
GOTERM_BP_FAT	GO:0007160~cell-matrix adhesion	14	COL13A1, ITGB4, ITGA2, ITGA3, ITGB2, ITGB3, ITGB1, PXN, CD44, CTGF, ITGA7, TRIP6, ADAM15, FN1	3.7852e-10
GOTERM_BP_FAT	GO:0043062~extracellular structure organization	17	COL4A2, ERBB2, TNC, MMP9, ELN, HSPG2, DCN, SERPINH1, COL5A2, COL5A1, ANXA2, EMILIN1, TNFRSF11B, TGFBI, COL1A2, COL6A2, COL1A1	3.85835e-10
GOTERM_MF_FAT	GO:0032403~protein complex binding	18	ICAM1, IRS2, LYN, ITGA2, ITGB3, ITGB1, COL5A1, DOK1, GRB10, FCGR2B, CTGF, ITGA5, TGFBI, FCER1G, SHC1, FCGR2A, THBS1, GRB14	2.14044e-10
GOTERM_BP_FAT	GO:0007169~transmembrane receptor protein tyrosine kinase signaling pathway	19	PLAT, EGFR, IRS2, EFNA1, ERBB2, MET, HGF, PXN, EPHA2, FLNA, STAT3, DOK1, GRB10, CTGF, ARF4, PDGFRB, SHC1, EGF, PILRB	3.77394e-10
GOTERM_BP_FAT	GO:0031589~cell-substrate adhesion	14	COL13A1, ITGB4, ITGA2, ITGA3, ITGB2, ITGB3, ITGB1, PXN, CD44, CTGF, ITGA7, TRIP6, ADAM15, FN1	8.44411e-10
GOTERM_CC_FAT	GO:0044420~extracellular matrix part	15	COL4A2, COL4A1, COL13A1, TNC, HSPG2, SPARC, COL5A2, COL5A1, ANXA2, LAMA4, COL6A3, COL1A2, COL6A1, COL1A1, FN1	1.66735e-10
GOTERM_BP_FAT	GO:0006928~cell motion	25	CAV2, CALD1, ERBB2, ITGB2, CXCL12, ITGB1, CD44, CTGF, CXCR4, THBS1, FN1, PLAT, ICAM1, MET, ANXA1, ITGA2, ITGA4, MMP14, MYH9, STAT3, COL5A1, PLAUR, ITGA5, PDGFRB, PLAU	1.01987e-09
GOTERM_BP_FAT	GO:0001568~blood vessel development	19	PLAT, CAV1, ITGA4, MYH9, MMP14, MMP2, CXCL12, COL5A1, ANXA2, LAMA4, CD44, CXCR4, CTGF, ITGA7, COL1A2, COL1A1, EGF, THBS1, PLAU	1.20525e-09
GOTERM_BP_FAT	GO:0001944~vasculature development	19	PLAT, CAV1, ITGA4, MYH9, MMP14, MMP2, CXCL12, COL5A1, ANXA2, LAMA4, CD44, CXCR4, CTGF, ITGA7, COL1A2, COL1A1, EGF, THBS1, PLAU	1.64496e-09
GOTERM_MF_FAT	GO:0005201~extracellular matrix structural constituent	13	COL4A2, COL4A1, COL13A1, ELN, COL5A2, COL5A1, EMILIN1, LAMA4, FBLN1, COL6A2, COL1A2, COL1A1, FN1	1.20122e-09
GOTERM_BP_FAT	GO:0007229~integrin-mediated signaling pathway	12	CTGF, ITGA5, ITGA7, ITGB4, ITGA2, NEDD9, ITGB2, ITGA3, ITGB3, ITGA4, MYH9, ITGB1	4.05082e-09
GOTERM_BP_FAT	GO:0007167~enzyme linked receptor protein signaling pathway	21	PLAT, EGFR, IRS2, EFNA1, ERBB2, MET, HGF, PXN, EPHA2, FLNA, STAT3, DOK1, GRB10, CTGF, ARF4, COL1A2, PDGFRB, SHC1, TGFB1I1, EGF, PILRB	3.77013e-09
GOTERM_BP_FAT	GO:0016477~cell migration	19	PLAT, CAV2, ICAM1, MET, ITGB2, ITGA4, MYH9, MMP14, CXCL12, ITGB1, COL5A1, CD44, CXCR4, ITGA5, CTGF, PDGFRB, THBS1, PLAU, FN1	6.27441e-09
GOTERM_BP_FAT	GO:0048870~cell motility	19	PLAT, CAV2, ICAM1, MET, ITGB2, ITGA4, MYH9, MMP14, CXCL12, ITGB1, COL5A1, CD44, CXCR4, ITGA5, CTGF, PDGFRB, THBS1, PLAU, FN1	3.34405e-08
GOTERM_BP_FAT	GO:0051674~localization of cell	19	PLAT, CAV2, ICAM1, MET, ITGB2, ITGA4, MYH9, MMP14, CXCL12, ITGB1, COL5A1, CD44, CXCR4, ITGA5, CTGF, PDGFRB, THBS1, PLAU, FN1	3.34405e-08
GOTERM_BP_FAT	GO:0001501~skeletal system development	19	EGFR, COL13A1, MMP9, HSPG2, SPARC, MMP14, MMP2, COL5A2, ANXA2, HOXC10, TNFRSF11B, CTGF, GFPT1, COL1A2, PDGFRB, COL1A1, IGFBP3, IGFBP5, SPP1	5.82626e-08
GOTERM_CC_FAT	GO:0016323~basolateral plasma membrane	16	EGFR, CAV2, CAV1, ERBB2, MET, ANXA1, ITGB4, NEDD9, ITGA2, FBLIM1, ITGB1, PXN, CD44, ITGA5, TGFB1I1, TRIP6	2.53035e-08
GOTERM_CC_FAT	GO:0043235~receptor complex	13	LYN, ERBB2, ITGB4, ITGA2, ITGA3, ITGB2, ITGA4, ITGB3, MYH9, ITGB1, ITGA5, ITGA7, TRIP6	2.60303e-08
GOTERM_CC_FAT	GO:0005581~collagen	9	COL4A2, COL4A1, COL13A1, COL6A3, COL1A2, COL6A1, COL1A1, COL5A2, COL5A1	2.46724e-08
GOTERM_BP_FAT	GO:0051270~regulation of cell motion	15	EGFR, ICAM1, IRS2, LYN, MMP9, ITGA2, ITGB3, CXCL12, LAMA4, CXCR4, PDGFRB, TRIP6, THBS1, IGFBP3, IGFBP5	2.08145e-07
GOTERM_MF_FAT	GO:0005178~integrin binding	10	ICAM1, LYN, CTGF, ITGA5, TGFBI, ITGA2, ITGB3, THBS1, ITGB1, COL5A1	1.62149e-07
GOTERM_BP_FAT	GO:0030334~regulation of cell migration	14	EGFR, ICAM1, IRS2, MMP9, ITGA2, ITGB3, CXCL12, LAMA4, CXCR4, PDGFRB, TRIP6, THBS1, IGFBP3, IGFBP5	3.73298e-07
GOTERM_CC_FAT	GO:0044459~plasma membrane part	49	EFNA1, TLR2, CD151, SDC2, CD44, CXCR4, IL1RAP, SHC1, PILRB, EGFR, F11R, ICAM1, LYN, HLA-A, FBLIM1, MMP14, MYH9, CD163, CD36, PDGFRB, TGFB1I1, CAV2, IL1R1, CAV1, ERBB2, ITGB4, NEDD9, ITGB2, ITGB3, ITGB1, PXN, CAMK2D, FCER1G, THBS1, FN1, NPHP1, MUC1, COL13A1, MET, ANXA1, ITGA2, ITGA3, ITGA4, CD63, EPHA2, ITGA5, ITGA7, TRIP6, IGFBP2	1.1468e-07
GOTERM_BP_FAT	GO:0010033~response to organic substance	26	CAV2, CAV1, IL1R1, ERBB2, TLR2, SERPINH1, TNFRSF11B, CD44, GSN, COL6A2, SHC1, THBS1, SPP1, EGFR, IRS2, LYN, SOCS3, SOCS1, ITGA2, STAT1, MMP14, STAT3, GRB10, COL1A1, IGFBP2, PPP1R15A	4.71195e-07
GOTERM_BP_FAT	GO:0007243~protein kinase cascade	19	EGFR, CAV1, NMI, EFNA1, SOCS3, ERBB2, SOCS1, MET, TLR2, HGF, STAT1, STAT3, STAT2, DOK1, CXCR4, SHC1, THBS1, TRIP6, EGF	4.9135e-07
GOTERM_BP_FAT	GO:0001503~ossification	12	EGFR, COL13A1, CTGF, HSPG2, SPARC, COL1A1, MMP14, COL5A2, IGFBP3, MMP2, IGFBP5, SPP1	5.39906e-07
GOTERM_CC_FAT	GO:0005887~integral to plasma membrane	34	CAV2, IL1R1, CAV1, EFNA1, ITGB4, TLR2, ITGB2, ITGB3, CD151, ITGB1, SDC2, CD44, CXCR4, IL1RAP, FCER1G, PILRB, MUC1, ICAM1, LYN, MET, HLA-A, ITGA2, ITGA3, ITGA4, MYH9, MMP14, CD63, EPHA2, CD163, CD36, ITGA5, ITGA7, PDGFRB, TRIP6	2.27097e-07
GOTERM_BP_FAT	GO:0060348~bone development	12	EGFR, COL13A1, CTGF, HSPG2, SPARC, COL1A1, MMP14, COL5A2, IGFBP3, MMP2, IGFBP5, SPP1	1.05011e-06
GOTERM_BP_FAT	GO:0042060~wound healing	14	PLAT, ERBB2, ITGA2, SERPING1, ITGB3, COL5A1, PLAUR, CD36, CD44, GSN, ITGA5, SERPINE1, PLAU, FN1	1.2821e-06
GOTERM_BP_FAT	GO:0040012~regulation of locomotion	14	EGFR, ICAM1, IRS2, MMP9, ITGA2, ITGB3, CXCL12, LAMA4, CXCR4, PDGFRB, TRIP6, THBS1, IGFBP3, IGFBP5	1.30791e-06
GOTERM_CC_FAT	GO:0031226~intrinsic to plasma membrane	34	CAV2, IL1R1, CAV1, EFNA1, ITGB4, TLR2, ITGB2, ITGB3, CD151, ITGB1, SDC2, CD44, CXCR4, IL1RAP, FCER1G, PILRB, MUC1, ICAM1, LYN, MET, HLA-A, ITGA2, ITGA3, ITGA4, MYH9, MMP14, CD63, EPHA2, CD163, CD36, ITGA5, ITGA7, PDGFRB, TRIP6	3.64161e-07
GOTERM_MF_FAT	GO:0048407~platelet-derived growth factor binding	6	COL4A1, COL1A2, PDGFRB, COL6A1, COL1A1, COL5A1	1.3081e-06
GOTERM_MF_FAT	GO:0005518~collagen binding	8	CD44, MMP9, ITGA2, DCN, SPARC, THBS1, SERPINH1, FN1	1.20366e-06
GOTERM_CC_FAT	GO:0005912~adherens junction	13	CAV2, CAV1, NEDD9, ITGA2, FBLIM1, MYH9, ITGB1, PXN, CD44, ITGA5, TGFB1I1, TRIP6, NPHP1	4.61878e-07
GOTERM_BP_FAT	GO:0009725~response to hormone stimulus	18	CAV2, CAV1, IRS2, LYN, SOCS3, ERBB2, SOCS1, ITGA2, MMP14, STAT1, STAT3, TNFRSF11B, GRB10, SHC1, COL1A1, IGFBP2, THBS1, SPP1	2.21748e-06
GOTERM_CC_FAT	GO:0005925~focal adhesion	11	CAV2, CAV1, CD44, ITGA5, FBLIM1, ITGA2, NEDD9, TGFB1I1, TRIP6, ITGB1, PXN	6.97716e-07
GOTERM_BP_FAT	GO:0030155~regulation of cell adhesion	12	ICAM1, LAMA4, CD36, GSN, ERBB2, TGFBI, ITGA2, COL1A1, MMP14, THBS1, EMILIN1, SPP1	2.74298e-06
GOTERM_CC_FAT	GO:0005924~cell-substrate adherens junction	11	CAV2, CAV1, CD44, ITGA5, FBLIM1, ITGA2, NEDD9, TGFB1I1, TRIP6, ITGB1, PXN	9.47339e-07
GOTERM_BP_FAT	GO:0007166~cell surface receptor linked signal transduction	41	IL1R1, EFNA1, ERBB2, ITGB4, TLR2, NEDD9, ITGB2, ITGB3, ITGB1, CXCL12, PXN, CXCR4, CTGF, FCER1G, SHC1, EGF, PILRB, EGFR, PLAT, IRS2, LYN, MET, ANXA1, ITGA2, ITGA3, HGF, ITGA4, MYH9, STAT1, CISH, EPHA2, FLNA, STAT3, DOK1, GRB10, ITGA5, ARF4, ITGA7, COL1A2, PDGFRB, TGFB1I1	4.10131e-06
GOTERM_CC_FAT	GO:0070161~anchoring junction	13	CAV2, CAV1, NEDD9, ITGA2, FBLIM1, MYH9, ITGB1, PXN, CD44, ITGA5, TGFB1I1, TRIP6, NPHP1	1.20957e-06
GOTERM_CC_FAT	GO:0030055~cell-substrate junction	11	CAV2, CAV1, CD44, ITGA5, FBLIM1, ITGA2, NEDD9, TGFB1I1, TRIP6, ITGB1, PXN	1.42597e-06
GOTERM_MF_FAT	GO:0050840~extracellular matrix binding	7	TGFBI, ELN, ITGA2, DCN, SPARC, THBS1, SPP1	4.58646e-06
GOTERM_BP_FAT	GO:0009719~response to endogenous stimulus	18	CAV2, CAV1, IRS2, LYN, SOCS3, ERBB2, SOCS1, ITGA2, MMP14, STAT1, STAT3, TNFRSF11B, GRB10, SHC1, COL1A1, IGFBP2, THBS1, SPP1	8.22043e-06
GOTERM_BP_FAT	GO:0007242~intracellular signaling cascade	32	CAV1, NMI, GRAP, EFNA1, ERBB2, TLR2, CXCR4, CTGF, GSN, SHC1, THBS1, EGF, EGFR, LYN, SOCS3, MET, SOCS1, HGF, STAT1, CISH, FLNA, STAT3, STAT2, DOK1, CD36, PLCG1, ARF4, COL1A2, TGFB1I1, TRIP6, GRB14, IGFBP5	9.89855e-06
GOTERM_BP_FAT	GO:0051272~positive regulation of cell motion	10	EGFR, ICAM1, IRS2, LYN, MMP9, PDGFRB, ITGA2, TRIP6, THBS1, CXCL12	1.3314e-05
GOTERM_BP_FAT	GO:0051174~regulation of phosphorus metabolic process	19	EGFR, CAV1, LYN, SOCS3, EFNA1, ERBB2, MET, SOCS1, ITGA2, ITGB2, HGF, CISH, CXCR4, PDGFRB, SHC1, EGF, THBS1, IGFBP3, PILRB	1.9251e-05
GOTERM_BP_FAT	GO:0019220~regulation of phosphate metabolic process	19	EGFR, CAV1, LYN, SOCS3, EFNA1, ERBB2, MET, SOCS1, ITGA2, ITGB2, HGF, CISH, CXCR4, PDGFRB, SHC1, EGF, THBS1, IGFBP3, PILRB	1.9251e-05
GOTERM_BP_FAT	GO:0007517~muscle organ development	13	CAV2, CAV1, ERBB2, TNC, MET, ELN, HSPG2, LMNA, ITGB1, ITGA7, COL6A3, PDGFRB, IGFBP5	2.3651e-05
GOTERM_BP_FAT	GO:0048514~blood vessel morphogenesis	13	PLAT, CAV1, ITGA4, MMP14, MYH9, CXCL12, ANXA2, CTGF, CXCR4, ITGA7, EGF, THBS1, PLAU	2.3651e-05
GOTERM_BP_FAT	GO:0042493~response to drug	13	CAV2, CAV1, LYN, SOCS3, ERBB2, SOCS1, TLR2, ITGA2, STAT1, STAT3, TNFRSF11B, IGFBP2, MVP	2.94591e-05
GOTERM_CC_FAT	GO:0005604~basement membrane	9	LAMA4, COL4A2, COL4A1, TNC, HSPG2, SPARC, COL5A1, FN1, ANXA2	9.1901e-06
GOTERM_BP_FAT	GO:0009991~response to extracellular stimulus	13	MUC1, CAV1, LYN, SOCS3, ITGA2, STAT1, TNFRSF11B, CD44, GSN, CTSD, COL1A1, IGFBP2, SPP1	3.47628e-05
GOTERM_CC_FAT	GO:0031091~platelet alpha granule	8	CD36, SERPING1, HGF, ITGB3, SPARC, EGF, THBS1, FN1	1.13699e-05
GOTERM_BP_FAT	GO:0042325~regulation of phosphorylation	18	EGFR, CAV1, LYN, SOCS3, EFNA1, ERBB2, SOCS1, MET, ITGB2, HGF, CISH, CXCR4, PDGFRB, SHC1, EGF, THBS1, IGFBP3, PILRB	4.70797e-05
GOTERM_BP_FAT	GO:0048545~response to steroid hormone stimulus	12	CAV2, CAV1, TNFRSF11B, SOCS3, ERBB2, SOCS1, COL1A1, MMP14, IGFBP2, THBS1, STAT3, SPP1	6.01363e-05
GOTERM_BP_FAT	GO:0030335~positive regulation of cell migration	9	EGFR, ICAM1, IRS2, MMP9, PDGFRB, ITGA2, TRIP6, THBS1, CXCL12	6.07017e-05
GOTERM_BP_FAT	GO:0006954~inflammatory response	15	F11R, NMI, LYN, TLR2, ANXA1, SERPING1, ITGB2, STAT3, CD163, CD44, CXCR4, IL1RAP, THBS1, FN1, SPP1	6.13066e-05
GOTERM_BP_FAT	GO:0031667~response to nutrient levels	12	MUC1, CAV1, TNFRSF11B, CD44, SOCS3, GSN, CTSD, ITGA2, COL1A1, IGFBP2, STAT1, SPP1	7.14302e-05
GOTERM_CC_FAT	GO:0005615~extracellular space	22	PLAT, EGFR, ICAM1, MMP9, LGALS1, LGALS8, SERPING1, MMP2, CXCL12, LGALS3BP, FBLN1, GSN, TGFBI, COL6A3, COL1A2, IGFBP2, EGF, THBS1, IGFBP3, FN1, IGFBP5, SPP1	2.09493e-05
KEGG_PATHWAY	hsa04810:Regulation of actin cytoskeleton	16	EGFR, ITGB4, ITGA2, ITGA3, ITGB2, ITGB3, ITGA4, MYH9, ITGB1, PXN, GSN, ITGA5, ITGA7, PDGFRB, EGF, FN1	5.23269e-05
GOTERM_BP_FAT	GO:0042127~regulation of cell proliferation	23	EGFR, CAV2, CAV1, IRS2, LYN, ERBB2, ANXA1, ITGA2, SPARC, STAT1, ITGB1, HOXC10, HES1, SERPINE1, CAMK2D, PDGFRB, SHC1, TGFB1I1, THBS1, EGF, IGFBP3, PLAU, IGFBP5	8.39547e-05
GOTERM_BP_FAT	GO:0040017~positive regulation of locomotion	9	EGFR, ICAM1, IRS2, MMP9, PDGFRB, ITGA2, TRIP6, THBS1, CXCL12	0.00011402
KEGG_PATHWAY	hsa04670:Leukocyte transendothelial migration	12	F11R, ICAM1, PLCG1, CXCR4, MMP9, ITGB2, ITGA4, JAM3, ITGB1, CXCL12, MMP2, PXN	6.59969e-05
GOTERM_BP_FAT	GO:0001666~response to hypoxia	10	PLAT, CAV1, CXCR4, SOCS3, CAMK2D, ITGA2, MMP14, THBS1, MMP2, PLAU	0.000134059
GOTERM_BP_FAT	GO:0043406~positive regulation of MAP kinase activity	9	EGFR, CXCR4, EFNA1, ERBB2, MET, SHC1, HGF, EGF, THBS1	0.000146983
GOTERM_CC_FAT	GO:0031982~vesicle	21	PLAT, EGFR, P4HB, CAV2, CAV1, PDIA3, SERPING1, ITGB3, SPARC, HGF, MMP14, ITGB1, ANXA2, CD36, CAMK2D, CTSD, IGFBP2, EGF, THBS1, FN1, SPP1	5.44077e-05
GOTERM_BP_FAT	GO:0007584~response to nutrient	10	MUC1, CAV1, TNFRSF11B, CD44, GSN, ITGA2, COL1A1, IGFBP2, STAT1, SPP1	0.000183528
GOTERM_BP_FAT	GO:0070482~response to oxygen levels	10	PLAT, CAV1, CXCR4, SOCS3, CAMK2D, ITGA2, MMP14, THBS1, MMP2, PLAU	0.000190232
GOTERM_BP_FAT	GO:0043405~regulation of MAP kinase activity	10	EGFR, CAV1, CXCR4, EFNA1, ERBB2, MET, SHC1, HGF, EGF, THBS1	0.000190232
GOTERM_CC_FAT	GO:0009986~cell surface	15	CAV2, ICAM1, P4HB, CAV1, TLR2, ITGA2, ITGB3, ITGA4, ITGB1, PLAUR, CD36, CD44, ITGA5, FCER1G, THBS1	5.86817e-05
GOTERM_BP_FAT	GO:0030199~collagen fibril organization	6	COL1A2, COL1A1, SERPINH1, COL5A2, COL5A1, ANXA2	0.000196608
GOTERM_CC_FAT	GO:0031988~membrane-bounded vesicle	19	PLAT, EGFR, P4HB, CAV2, PDIA3, SERPING1, ITGB3, SPARC, HGF, MMP14, ITGB1, ANXA2, CD36, CAMK2D, CTSD, EGF, THBS1, FN1, SPP1	6.95066e-05
GOTERM_MF_FAT	GO:0001871~pattern binding	10	CD44, COL13A1, CTGF, SUSD2, TLR2, DCN, THBS1, MDK, COL5A1, FN1	0.000336558
GOTERM_MF_FAT	GO:0030247~polysaccharide binding	10	CD44, COL13A1, CTGF, SUSD2, TLR2, DCN, THBS1, MDK, COL5A1, FN1	0.000336558
GOTERM_CC_FAT	GO:0031410~cytoplasmic vesicle	20	PLAT, EGFR, P4HB, CAV2, CAV1, PDIA3, SERPING1, ITGB3, SPARC, HGF, MMP14, ITGB1, ANXA2, CD36, CAMK2D, CTSD, EGF, THBS1, IGFBP2, FN1	9.6116e-05
GOTERM_BP_FAT	GO:0043434~response to peptide hormone stimulus	10	CAV2, IRS2, GRB10, LYN, SOCS3, SOCS1, SHC1, COL1A1, STAT1, STAT3	0.000373171
GOTERM_CC_FAT	GO:0044433~cytoplasmic vesicle part	11	EGFR, CAV2, CD36, CAMK2D, SERPING1, HGF, ITGB3, SPARC, EGF, THBS1, FN1	0.000107975
GOTERM_BP_FAT	GO:0032101~regulation of response to external stimulus	10	CAV1, SERPINE1, FCER1G, ITGA2, SERPING1, THBS1, CXCL12, PLAU, SPP1, ANXA2	0.000472549
GOTERM_CC_FAT	GO:0016023~cytoplasmic membrane-bounded vesicle	18	PLAT, EGFR, CAV2, P4HB, PDIA3, SERPING1, ITGB3, SPARC, HGF, MMP14, ITGB1, ANXA2, CD36, CAMK2D, CTSD, EGF, THBS1, FN1	0.00015752
GOTERM_BP_FAT	GO:0060537~muscle tissue development	9	CAV2, CAV1, TNC, ERBB2, ELN, HSPG2, PDGFRB, ITGB1, IGFBP5	0.000581262
GOTERM_MF_FAT	GO:0001948~glycoprotein binding	6	ERBB2, LGALS1, ITGB2, THBS1, COL5A1, FLNA	0.000569426
KEGG_PATHWAY	hsa05200:Pathways in cancer	18	EGFR, COL4A2, COL4A1, MMP9, ERBB2, MET, ITGA2, ITGA3, HGF, STAT1, ITGB1, MMP2, STAT3, LAMA4, PLCG1, PDGFRB, EGF, FN1	0.000345708
GOTERM_BP_FAT	GO:0022604~regulation of cell morphogenesis	9	EFNA1, ITGA7, FBLIM1, ITGB2, TGFB1I1, MYH9, SPP1, FN1, NUMBL	0.000800559
GOTERM_BP_FAT	GO:0007259~JAK-STAT cascade	6	NMI, SOCS3, SOCS1, STAT1, STAT3, STAT2	0.000799266
GOTERM_BP_FAT	GO:0032570~response to progesterone stimulus	5	CAV1, SOCS3, ERBB2, SOCS1, THBS1	0.000857739
GOTERM_BP_FAT	GO:0048732~gland development	9	EGFR, HES1, CAV2, CAV1, IRS2, ERBB2, MET, ITGA2, MDK	0.0009382
KEGG_PATHWAY	hsa05412:Arrhythmogenic right ventricular cardiomyopathy (ARVC)	9	ITGA5, ITGA7, LMNA, ITGB4, ITGA2, ITGA3, ITGB3, ITGA4, ITGB1	0.000435992
GOTERM_BP_FAT	GO:0009968~negative regulation of signal transduction	11	CAV1, GRB10, SOCS3, SOCS1, TGFB1I1, RGS16, THBS1, IGFBP3, GRB14, CISH, IGFBP5	0.000972187
GOTERM_BP_FAT	GO:0050730~regulation of peptidyl-tyrosine phosphorylation	7	EGFR, CAV1, LYN, SOCS1, PDGFRB, ITGB2, EGF	0.000993808
GOTERM_MF_FAT	GO:0005539~glycosaminoglycan binding	9	CD44, COL13A1, CTGF, TLR2, DCN, THBS1, MDK, COL5A1, FN1	0.00100966
GOTERM_BP_FAT	GO:0045860~positive regulation of protein kinase activity	11	EGFR, CXCR4, EFNA1, ERBB2, MET, SHC1, HGF, EGF, THBS1, PILRB, CISH	0.00101221
GOTERM_BP_FAT	GO:0050817~coagulation	8	PLAT, CD36, SERPINE1, ITGA2, SERPING1, ITGB3, PLAU, PLAUR	0.00108626
GOTERM_BP_FAT	GO:0007596~blood coagulation	8	PLAT, CD36, SERPINE1, ITGA2, SERPING1, ITGB3, PLAU, PLAUR	0.00108626
GOTERM_BP_FAT	GO:0006952~defense response	18	F11R, IL1R1, NMI, LYN, TLR2, ANXA1, ITGB2, SERPING1, ITGB1, STAT3, CD163, LGALS3BP, CD44, CXCR4, IL1RAP, THBS1, FN1, SPP1	0.00109967
GOTERM_CC_FAT	GO:0042383~sarcolemma	7	COL6A3, CAMK2D, ANXA1, COL6A2, COL6A1, ITGB1, ANXA2	0.000352347
GOTERM_CC_FAT	GO:0031093~platelet alpha granule lumen	6	SERPING1, HGF, SPARC, EGF, THBS1, FN1	0.000340797
GOTERM_BP_FAT	GO:0016337~cell-cell adhesion	12	EGFR, ICAM1, CD44, COL13A1, CTGF, ITGA5, COL6A2, ITGB2, ITGA4, MYH9, ITGB1, NPHP1	0.00114439
GOTERM_BP_FAT	GO:0050878~regulation of body fluid levels	9	PLAT, CD36, SERPINE1, ITGA2, SERPING1, ITGB3, PLAU, PLAUR, ANXA2	0.00113178
GOTERM_MF_FAT	GO:0005198~structural molecule activity	18	CAV1, COL4A2, COL4A1, COL13A1, ELN, LMNA, ANXA1, COL5A2, COL5A1, EMILIN1, LAMA4, FBLN1, COL1A2, COL6A2, COL1A1, THBS1, FN1, NPHP1	0.00117799
GOTERM_BP_FAT	GO:0043627~response to estrogen stimulus	8	CAV2, CAV1, TNFRSF11B, SOCS3, SOCS1, MMP14, IGFBP2, STAT3	0.00122317
GOTERM_BP_FAT	GO:0033674~positive regulation of kinase activity	11	EGFR, CXCR4, EFNA1, ERBB2, MET, SHC1, HGF, EGF, THBS1, PILRB, CISH	0.00123239
GOTERM_CC_FAT	GO:0045177~apical part of cell	10	PLAT, EGFR, MUC1, CAV2, CAV1, CD44, ERBB2, IGFBP2, SPP1, FN1	0.000421722
GOTERM_BP_FAT	GO:0007599~hemostasis	8	PLAT, CD36, SERPINE1, ITGA2, SERPING1, ITGB3, PLAU, PLAUR	0.00141853
GOTERM_BP_FAT	GO:0010810~regulation of cell-substrate adhesion	6	CD36, COL1A1, MMP14, THBS1, EMILIN1, SPP1	0.00144082
GOTERM_BP_FAT	GO:0018108~peptidyl-tyrosine phosphorylation	6	LYN, ERBB2, PDGFRB, EGF, FES, STAT1	0.00144082
GOTERM_CC_FAT	GO:0060205~cytoplasmic membrane-bounded vesicle lumen	6	SERPING1, HGF, SPARC, EGF, THBS1, FN1	0.000451555
GOTERM_BP_FAT	GO:0001525~angiogenesis	9	CXCR4, CTGF, MYH9, MMP14, EGF, THBS1, CXCL12, PLAU, ANXA2	0.00147417
GOTERM_BP_FAT	GO:0040008~regulation of growth	13	SOCS3, SOCS1, NEDD9, STAT3, CISH, CD44, CTGF, CAMK2D, SHC1, IGFBP2, IGFBP3, IGFBP5, SPP1	0.00152338
GOTERM_BP_FAT	GO:0051347~positive regulation of transferase activity	11	EGFR, CXCR4, EFNA1, ERBB2, MET, SHC1, HGF, EGF, THBS1, PILRB, CISH	0.00157209
GOTERM_BP_FAT	GO:0018212~peptidyl-tyrosine modification	6	LYN, ERBB2, PDGFRB, EGF, FES, STAT1	0.00166938
GOTERM_CC_FAT	GO:0031983~vesicle lumen	6	SERPING1, HGF, SPARC, EGF, THBS1, FN1	0.000543777
KEGG_PATHWAY	hsa05410:Hypertrophic cardiomyopathy (HCM)	9	ITGA5, ITGA7, LMNA, ITGB4, ITGA2, ITGA3, ITGB3, ITGA4, ITGB1	0.000844045
GOTERM_MF_FAT	GO:0030246~carbohydrate binding	13	COL13A1, LGALS1, SUSD2, TLR2, LGALS8, DCN, MDK, COL5A1, CD44, CTGF, GFPT1, THBS1, FN1	0.00177943
GOTERM_BP_FAT	GO:0044093~positive regulation of molecular function	17	EGFR, ICAM1, CAV1, EFNA1, ERBB2, CALD1, MET, TLR2, ITGA2, HGF, STAT1, CISH, CXCR4, SHC1, EGF, THBS1, PILRB	0.00183637
GOTERM_BP_FAT	GO:0010648~negative regulation of cell communication	11	CAV1, GRB10, SOCS3, SOCS1, TGFB1I1, RGS16, THBS1, IGFBP3, GRB14, CISH, IGFBP5	0.00197702
GOTERM_CC_FAT	GO:0009925~basal plasma membrane	5	CAV2, CAV1, ERBB2, MET, ITGB4	0.000723751
GOTERM_BP_FAT	GO:0032268~regulation of cellular protein metabolic process	15	EGFR, CAV1, LYN, SOCS3, SOCS1, ITGA2, SERPING1, ITGB2, ITGB3, PDGFRB, EGF, THBS1, PPP1R15A, IGFBP3, IGFBP5	0.00226482
GOTERM_BP_FAT	GO:0014706~striated muscle tissue development	8	CAV2, CAV1, TNC, ERBB2, ELN, HSPG2, ITGB1, IGFBP5	0.0022956
GOTERM_BP_FAT	GO:0010035~response to inorganic substance	10	EGFR, CAV1, TNFRSF11B, GSN, SERPINE1, COL1A1, IGFBP2, THBS1, STAT1, PXN	0.0022716
GOTERM_MF_FAT	GO:0005158~insulin receptor binding	5	DOK1, IRS2, GRB10, SHC1, GRB14	0.00228255
GOTERM_BP_FAT	GO:0006468~protein amino acid phosphorylation	18	EGFR, CAV2, LYN, EFNA1, ERBB2, MET, HGF, FES, STAT1, EPHA2, TP53RK, CXCR4, CAMK2D, PDGFRB, SHC1, EGF, THBS1, IGFBP3	0.00234398
GOTERM_BP_FAT	GO:0032963~collagen metabolic process	5	MMP9, COL1A1, SERPINH1, MMP2, COL5A1	0.00237404
GOTERM_BP_FAT	GO:0007159~leukocyte adhesion	5	ICAM1, ITGA5, ITGB2, ITGA4, ITGB1	0.00237404
GOTERM_MF_FAT	GO:0004713~protein tyrosine kinase activity	9	TP53RK, EGFR, CAV2, LYN, ERBB2, MET, PDGFRB, FES, EPHA2	0.00240014
KEGG_PATHWAY	hsa05414:Dilated cardiomyopathy	9	ITGA5, ITGA7, LMNA, ITGB4, ITGA2, ITGA3, ITGB3, ITGA4, ITGB1	0.00129887
GOTERM_BP_FAT	GO:0009612~response to mechanical stimulus	6	CAV1, ITGA2, COL1A1, MMP14, IGFBP2, STAT1	0.00314221
GOTERM_BP_FAT	GO:0008283~cell proliferation	14	EGFR, IRS2, ERBB2, MET, ELN, ITGA2, HGF, MMP14, FES, CXCL12, NUMBL, CSE1L, CXCR4, TGFBI	0.00340891
GOTERM_BP_FAT	GO:0044259~multicellular organismal macromolecule metabolic process	5	MMP9, COL1A1, SERPINH1, MMP2, COL5A1	0.00343314
GOTERM_CC_FAT	GO:0005583~fibrillar collagen	4	COL1A2, COL1A1, COL5A2, COL5A1	0.00122624
GOTERM_CC_FAT	GO:0045178~basal part of cell	5	CAV2, CAV1, ERBB2, MET, ITGB4	0.00121431
GOTERM_BP_FAT	GO:0001932~regulation of protein amino acid phosphorylation	9	EGFR, CAV1, LYN, SOCS3, SOCS1, PDGFRB, ITGB2, EGF, IGFBP3	0.0035978
GOTERM_BP_FAT	GO:0045785~positive regulation of cell adhesion	6	CD36, ERBB2, ITGA2, THBS1, EMILIN1, SPP1	0.00414429
GOTERM_CC_FAT	GO:0009897~external side of plasma membrane	9	ICAM1, CD44, ITGA5, TLR2, FCER1G, ITGA2, ITGB3, ITGA4, THBS1	0.00145925
GOTERM_BP_FAT	GO:0030879~mammary gland development	6	CAV2, CAV1, IRS2, ERBB2, MET, ITGA2	0.00515221
GOTERM_BP_FAT	GO:0000165~MAPKKK cascade	9	EGFR, CAV1, CXCR4, EFNA1, MET, SHC1, HGF, EGF, THBS1	0.00527236
GOTERM_CC_FAT	GO:0016324~apical plasma membrane	8	EGFR, MUC1, CAV2, CAV1, CD44, ERBB2, IGFBP2, FN1	0.00179818
GOTERM_BP_FAT	GO:0045859~regulation of protein kinase activity	12	EGFR, CAV1, CXCR4, EFNA1, ERBB2, MET, SHC1, HGF, EGF, THBS1, PILRB, CISH	0.00581321
GOTERM_BP_FAT	GO:0030193~regulation of blood coagulation	5	CAV1, SERPINE1, THBS1, PLAU, ANXA2	0.00575602
GOTERM_BP_FAT	GO:0002687~positive regulation of leukocyte migration	4	ICAM1, ITGA2, THBS1, CXCL12	0.00572656
GOTERM_BP_FAT	GO:0046627~negative regulation of insulin receptor signaling pathway	4	GRB10, SOCS3, SOCS1, GRB14	0.00572656
GOTERM_CC_FAT	GO:0030141~secretory granule	9	PLAT, CD36, SERPING1, HGF, ITGB3, SPARC, EGF, THBS1, FN1	0.00203652
GOTERM_BP_FAT	GO:0007519~skeletal muscle tissue development	6	CAV2, CAV1, TNC, ERBB2, ELN, IGFBP5	0.00603511
GOTERM_BP_FAT	GO:0033273~response to vitamin	6	MUC1, CD44, GSN, ITGA2, IGFBP2, SPP1	0.00603511
GOTERM_BP_FAT	GO:0060538~skeletal muscle organ development	6	CAV2, CAV1, TNC, ERBB2, ELN, IGFBP5	0.00603511
GOTERM_BP_FAT	GO:0044236~multicellular organismal metabolic process	5	MMP9, COL1A1, SERPINH1, MMP2, COL5A1	0.00618642
GOTERM_CC_FAT	GO:0031252~cell leading edge	8	CTTN, CXCR4, ITGA5, GSN, NEDD9, MYH9, ITGB1, PXN	0.00213627
GOTERM_BP_FAT	GO:0008284~positive regulation of cell proliferation	13	EGFR, IRS2, LYN, ERBB2, ITGA2, STAT1, ITGB1, HES1, HOXC10, CAMK2D, PDGFRB, SHC1, EGF	0.00692715
GOTERM_BP_FAT	GO:0031099~regeneration	6	SOCS3, GSN, SOCS1, SERPINE1, PLAU, PLAUR	0.00717244
GOTERM_BP_FAT	GO:0043549~regulation of kinase activity	12	EGFR, CAV1, CXCR4, EFNA1, ERBB2, MET, SHC1, HGF, EGF, THBS1, PILRB, CISH	0.00716044
GOTERM_CC_FAT	GO:0030054~cell junction	15	F11R, CAV2, CAV1, COL13A1, NEDD9, ITGA2, FBLIM1, MYH9, ITGB1, PXN, CD44, ITGA5, TGFB1I1, TRIP6, NPHP1	0.0024673
GOTERM_BP_FAT	GO:0050818~regulation of coagulation	5	CAV1, SERPINE1, THBS1, PLAU, ANXA2	0.00880751
KEGG_PATHWAY	hsa04640:Hematopoietic cell lineage	8	IL1R1, CD36, CD44, ITGA5, ITGA2, ITGA3, ITGB3, ITGA4	0.00466183
GOTERM_BP_FAT	GO:0048705~skeletal system morphogenesis	7	COL13A1, CTGF, GFPT1, HSPG2, PDGFRB, COL1A1, MMP2	0.00934859
GOTERM_BP_FAT	GO:0001763~morphogenesis of a branching structure	6	CD44, CXCR4, COL13A1, MMP14, EGF, CXCL12	0.00947928
GOTERM_MF_FAT	GO:0042802~identical protein binding	16	EGFR, CAV2, CAV1, ERBB2, LGALS1, ITGA2, ITGA4, ITGB3, MYH9, ITGB1, FLNA, EMILIN1, COL1A2, COL1A1, TRIP6, THBS1	0.0105856
GOTERM_BP_FAT	GO:0051338~regulation of transferase activity	12	EGFR, CAV1, CXCR4, EFNA1, ERBB2, MET, SHC1, HGF, EGF, THBS1, PILRB, CISH	0.00966569
KEGG_PATHWAY	hsa05219:Bladder cancer	6	EGFR, MMP9, ERBB2, EGF, THBS1, MMP2	0.00484175
GOTERM_BP_FAT	GO:0046626~regulation of insulin receptor signaling pathway	4	GRB10, SOCS3, SOCS1, GRB14	0.0106016
GOTERM_BP_FAT	GO:0002685~regulation of leukocyte migration	4	ICAM1, ITGA2, THBS1, CXCL12	0.0122514
GOTERM_MF_FAT	GO:0019899~enzyme binding	14	EGFR, CAV2, CAV1, IRS2, LYN, ERBB2, SOCS1, ITGB2, FLNA, STAT3, ANXA2, PLAUR, SERPINE1, TRIP6	0.013778
GOTERM_BP_FAT	GO:0048660~regulation of smooth muscle cell proliferation	5	EGFR, ITGA2, STAT1, IGFBP3, IGFBP5	0.0128324
GOTERM_BP_FAT	GO:0032964~collagen biosynthetic process	3	COL1A1, SERPINH1, COL5A1	0.0129396
GOTERM_BP_FAT	GO:0042692~muscle cell differentiation	7	CAV2, TNC, ERBB2, LGALS1, MYH9, ADAM12, ITGB1	0.0130396
GOTERM_BP_FAT	GO:0010647~positive regulation of cell communication	11	EGFR, CAV2, CAV1, LYN, ERBB2, LGALS1, ITGA2, TGFB1I1, EGF, THBS1, FLNA	0.0131369
GOTERM_BP_FAT	GO:0043085~positive regulation of catalytic activity	14	EGFR, CAV1, EFNA1, ERBB2, MET, ITGA2, HGF, STAT1, CISH, CXCR4, SHC1, EGF, THBS1, PILRB	0.0138391
GOTERM_BP_FAT	GO:0000187~activation of MAPK activity	6	CXCR4, EFNA1, MET, SHC1, HGF, THBS1	0.0137908
GOTERM_BP_FAT	GO:0016310~phosphorylation	18	EGFR, CAV2, LYN, EFNA1, ERBB2, MET, HGF, FES, STAT1, EPHA2, TP53RK, CXCR4, CAMK2D, PDGFRB, SHC1, EGF, THBS1, IGFBP3	0.013805
GOTERM_BP_FAT	GO:0046777~protein amino acid autophosphorylation	6	EGFR, CAV2, ERBB2, MET, CAMK2D, PDGFRB	0.0158966
GOTERM_MF_FAT	GO:0019900~kinase binding	8	CAV2, CAV1, IRS2, SOCS1, ITGB2, TRIP6, STAT3, FLNA	0.0183424
GOTERM_BP_FAT	GO:0007044~cell-substrate junction assembly	4	ITGA5, ITGB3, TRIP6, FN1	0.0170208
GOTERM_MF_FAT	GO:0031994~insulin-like growth factor I binding	3	IGFBP2, IGFBP3, IGFBP5	0.018078
GOTERM_BP_FAT	GO:0051146~striated muscle cell differentiation	6	CAV2, TNC, ERBB2, MYH9, ADAM12, ITGB1	0.0182096
GOTERM_MF_FAT	GO:0005509~calcium ion binding	19	MMP9, ANXA1, ITGA2, ITGA3, ITGA4, SPARC, MMP14, STAT1, MMP2, STAT3, ANXA2, STAT2, FBLN1, PLCG1, ITGA5, GSN, ITGA7, THBS1, EGF	0.0189342
GOTERM_BP_FAT	GO:0032870~cellular response to hormone stimulus	7	IRS2, GRB10, ITGA2, SHC1, IGFBP2, STAT1, STAT3	0.0196465
GOTERM_MF_FAT	GO:0005520~insulin-like growth factor binding	4	CTGF, IGFBP2, IGFBP3, IGFBP5	0.0194193
GOTERM_BP_FAT	GO:0008360~regulation of cell shape	5	ITGA7, FBLIM1, ITGB2, MYH9, FN1	0.0210414
GOTERM_MF_FAT	GO:0030674~protein binding, bridging	6	GRB10, GRAP, COL1A2, ANXA1, COL6A2, GRB14	0.0203289
GOTERM_BP_FAT	GO:0003013~circulatory system process	8	CAV2, CAV1, ELN, COL1A2, CAMK2D, SERPING1, STAT1, CXCL12	0.0221788
GOTERM_BP_FAT	GO:0008015~blood circulation	8	CAV2, CAV1, ELN, COL1A2, CAMK2D, SERPING1, STAT1, CXCL12	0.0221788
GOTERM_BP_FAT	GO:0051248~negative regulation of protein metabolic process	8	CAV1, SOCS1, SERPING1, ITGB3, THBS1, IGFBP3, FLNA, IGFBP5	0.0226577
GOTERM_CC_FAT	GO:0042470~melanosome	6	P4HB, PDIA3, CTSD, MMP14, ITGB1, ANXA2	0.0092431
GOTERM_CC_FAT	GO:0048770~pigment granule	6	P4HB, PDIA3, CTSD, MMP14, ITGB1, ANXA2	0.0092431
GOTERM_BP_FAT	GO:0018149~peptide cross-linking	4	ANXA1, DCN, THBS1, FN1	0.0231068
GOTERM_BP_FAT	GO:0033627~cell adhesion mediated by integrin	3	ICAM1, ITGA5, ITGB1	0.0233804
GOTERM_MF_FAT	GO:0051219~phosphoprotein binding	4	CAV2, LYN, CD44, GRB14	0.0221348
GOTERM_CC_FAT	GO:0048471~perinuclear region of cytoplasm	10	CAV2, DOK1, CAV1, LYN, GSN, ERBB2, LMNA, ITGA2, SPP1, ANXA2	0.00985687
GOTERM_BP_FAT	GO:0034330~cell junction organization	5	ITGA5, ITGB3, TRIP6, FN1, NUMBL	0.0245585
GOTERM_BP_FAT	GO:0009628~response to abiotic stimulus	11	EGFR, CAV1, LYN, SOCS3, ITGA2, COL1A1, MMP14, IGFBP2, THBS1, STAT1, NPHP1	0.0264956
GOTERM_MF_FAT	GO:0004175~endopeptidase activity	11	PLAT, PDIA3, MMP9, SERPINE1, CTSD, HGF, ADAM12, MMP14, MMP2, PLAU, ADAM15	0.0235045
GOTERM_BP_FAT	GO:0001558~regulation of cell growth	8	CD44, CTGF, CAMK2D, IGFBP2, IGFBP3, CISH, IGFBP5, SPP1	0.0266701
GOTERM_BP_FAT	GO:0010811~positive regulation of cell-substrate adhesion	4	CD36, THBS1, EMILIN1, SPP1	0.0274382
GOTERM_BP_FAT	GO:0007173~epidermal growth factor receptor signaling pathway	4	EGFR, ARF4, SHC1, EGF	0.0274382
GOTERM_MF_FAT	GO:0019864~IgG binding	3	FCGR2B, FCER1G, FCGR2A	0.0249396
GOTERM_BP_FAT	GO:0048585~negative regulation of response to stimulus	6	GRB10, SOCS3, SOCS1, SERPING1, GRB14, SPP1	0.028938
GOTERM_BP_FAT	GO:0032868~response to insulin stimulus	6	IRS2, GRB10, LYN, SOCS3, SHC1, STAT1	0.028938
GOTERM_BP_FAT	GO:0043588~skin development	4	COL1A2, COL1A1, COL5A2, COL5A1	0.0298535
GOTERM_MF_FAT	GO:0008201~heparin binding	6	COL13A1, CTGF, THBS1, MDK, COL5A1, FN1	0.025502
GOTERM_CC_FAT	GO:0042995~cell projection	16	CAV2, ERBB2, CALD1, MET, ANXA1, NEDD9, ITGA2, MYH9, STAT1, ITGB1, PXN, CTTN, CXCR4, ITGA5, GSN, SPP1	0.0142444
KEGG_PATHWAY	hsa05222:Small cell lung cancer	7	LAMA4, COL4A2, COL4A1, ITGA2, ITGA3, ITGB1, FN1	0.0189045
GOTERM_CC_FAT	GO:0005938~cell cortex	7	CAV1, CTTN, CALD1, FBLIM1, NEDD9, MYH9, FLNA	0.0147075
GOTERM_BP_FAT	GO:0042063~gliogenesis	5	EGFR, LYN, GSN, ERBB2, MMP14	0.0375733
GOTERM_BP_FAT	GO:0048754~branching morphogenesis of a tube	5	CD44, CXCR4, MMP14, EGF, CXCL12	0.0375733
GOTERM_BP_FAT	GO:0006796~phosphate metabolic process	19	EGFR, CAV2, LYN, EFNA1, ERBB2, MET, HGF, FES, STAT1, PTPN12, EPHA2, TP53RK, CXCR4, CAMK2D, PDGFRB, SHC1, EGF, THBS1, IGFBP3	0.0387357
GOTERM_BP_FAT	GO:0006793~phosphorus metabolic process	19	EGFR, CAV2, LYN, EFNA1, ERBB2, MET, HGF, FES, STAT1, PTPN12, EPHA2, TP53RK, CXCR4, CAMK2D, PDGFRB, SHC1, EGF, THBS1, IGFBP3	0.0387357
GOTERM_BP_FAT	GO:0042246~tissue regeneration	4	GSN, SERPINE1, PLAU, PLAUR	0.0385843
GOTERM_MF_FAT	GO:0004714~transmembrane receptor protein tyrosine kinase activity	5	EGFR, ERBB2, MET, PDGFRB, EPHA2	0.0322525
GOTERM_BP_FAT	GO:0043623~cellular protein complex assembly	7	CAV2, CAV1, CSE1L, GSN, FLNA, PILRB, PXN	0.0458813
KEGG_PATHWAY	hsa05214:Glioma	6	EGFR, PLCG1, CAMK2D, PDGFRB, SHC1, EGF	0.025124
GOTERM_BP_FAT	GO:0035295~tube development	8	HES1, CAV2, CD44, CXCR4, CTGF, MMP14, EGF, CXCL12	0.0496947
GOTERM_MF_FAT	GO:0005161~platelet-derived growth factor receptor binding	3	IL1R1, LYN, PDGFRB	0.0424473
GOTERM_BP_FAT	GO:0007015~actin filament organization	5	GSN, CALD1, ELN, NEDD9, FLNA	0.0518382
GOTERM_BP_FAT	GO:0010812~negative regulation of cell-substrate adhesion	3	COL1A1, MMP14, THBS1	0.0528347
GOTERM_BP_FAT	GO:0030036~actin cytoskeleton organization	8	GSN, CALD1, ELN, NEDD9, MYH9, ITGB1, FLNA, NPHP1	0.055997
GOTERM_BP_FAT	GO:0001775~cell activation	9	EGFR, ICAM1, LYN, CXCR4, TLR2, ITGA4, MYH9, ITGB1, CXCL12	0.0568091
GOTERM_BP_FAT	GO:0014070~response to organic cyclic substance	6	LYN, CD44, SOCS3, ITGA2, STAT1, STAT3	0.0592242
GOTERM_BP_FAT	GO:0042730~fibrinolysis	3	SERPINE1, PLAU, ANXA2	0.0608406
GOTERM_BP_FAT	GO:0000768~syncytium formation by plasma membrane fusion	3	CD44, MYH9, ADAM12	0.0608406
GOTERM_BP_FAT	GO:0001958~endochondral ossification	3	COL13A1, HSPG2, COL1A1	0.0608406
GOTERM_BP_FAT	GO:0008354~germ cell migration	3	CXCR4, ITGB1, CXCL12	0.0608406
GOTERM_BP_FAT	GO:0014910~regulation of smooth muscle cell migration	3	ITGA2, IGFBP3, IGFBP5	0.0608406
KEGG_PATHWAY	hsa05120:Epithelial cell signaling in Helicobacter pylori infection	6	EGFR, F11R, PLCG1, LYN, MET, JAM3	0.0321364
GOTERM_BP_FAT	GO:0031399~regulation of protein modification process	9	EGFR, CAV1, LYN, SOCS3, SOCS1, PDGFRB, ITGB2, EGF, IGFBP3	0.0650553
GOTERM_BP_FAT	GO:0009967~positive regulation of signal transduction	9	CAV2, CAV1, LYN, ERBB2, LGALS1, TGFB1I1, EGF, THBS1, FLNA	0.0650553
GOTERM_BP_FAT	GO:0034097~response to cytokine stimulus	5	IL1R1, SOCS3, SOCS1, STAT1, STAT3	0.0677513
GOTERM_BP_FAT	GO:0008045~motor axon guidance	3	CXCR4, ERBB2, CXCL12	0.0695619
GOTERM_BP_FAT	GO:0032269~negative regulation of cellular protein metabolic process	7	CAV1, SOCS1, SERPING1, ITGB3, THBS1, IGFBP3, IGFBP5	0.0693235
GOTERM_BP_FAT	GO:0002684~positive regulation of immune system process	8	ICAM1, LYN, TLR2, FCER1G, ITGA2, SERPING1, THBS1, CXCL12	0.0691073
GOTERM_BP_FAT	GO:0034329~cell junction assembly	4	ITGA5, ITGB3, TRIP6, FN1	0.069045
GOTERM_BP_FAT	GO:0051130~positive regulation of cellular component organization	7	CAV2, CAV1, ITGA2, TGFB1I1, CD63, EGF, NUMBL	0.0696044
KEGG_PATHWAY	hsa04514:Cell adhesion molecules (CAMs)	8	F11R, ICAM1, HLA-A, ITGB2, ITGA4, JAM3, ITGB1, SDC2	0.0350076
GOTERM_BP_FAT	GO:0010038~response to metal ion	6	EGFR, CAV1, TNFRSF11B, GSN, IGFBP2, THBS1	0.071922
GOTERM_BP_FAT	GO:0030029~actin filament-based process	8	GSN, CALD1, ELN, NEDD9, MYH9, ITGB1, FLNA, NPHP1	0.071645
GOTERM_BP_FAT	GO:0001649~osteoblast differentiation	4	COL1A1, IGFBP3, IGFBP5, SPP1	0.0716589
GOTERM_BP_FAT	GO:0045321~leukocyte activation	8	ICAM1, LYN, CXCR4, TLR2, ITGA4, MYH9, ITGB1, CXCL12	0.0721742
GOTERM_BP_FAT	GO:0030182~neuron differentiation	11	EGFR, HOXC10, HES1, CD44, CXCR4, EFNA1, ERBB2, CXCL12, STAT3, EPHA2, NUMBL	0.0717967
GOTERM_MF_FAT	GO:0005154~epidermal growth factor receptor binding	3	ARF4, SHC1, EGF	0.0658238
GOTERM_BP_FAT	GO:0000904~cell morphogenesis involved in differentiation	8	HES1, CXCR4, ERBB2, HGF, MYH9, CXCL12, FN1, NUMBL	0.0742538
GOTERM_BP_FAT	GO:0007162~negative regulation of cell adhesion	4	TGFBI, COL1A1, MMP14, THBS1	0.0743
GOTERM_BP_FAT	GO:0006949~syncytium formation	3	CD44, MYH9, ADAM12	0.0738205
GOTERM_MF_FAT	GO:0019865~immunoglobulin binding	3	FCGR2B, FCER1G, FCGR2A	0.0726771
GOTERM_BP_FAT	GO:0051051~negative regulation of transport	6	IRS2, GRB10, ITGB3, EGF, THBS1, FLNA	0.0816387
GOTERM_BP_FAT	GO:0032369~negative regulation of lipid transport	3	IRS2, ITGB3, THBS1	0.0831411
GOTERM_BP_FAT	GO:0048589~developmental growth	5	GSN, SERPINE1, PLAU, IGFBP5, PLAUR	0.0839947
GOTERM_BP_FAT	GO:0060350~endochondral bone morphogenesis	3	COL13A1, HSPG2, COL1A1	0.0927491
GOTERM_BP_FAT	GO:0022612~gland morphogenesis	3	EGFR, CAV1, ERBB2	0.0927491
GOTERM_BP_FAT	GO:0044087~regulation of cellular component biogenesis	6	CAV2, CAV1, GSN, ELN, MMP14, THBS1	0.0969589
GOTERM_MF_FAT	GO:0004857~enzyme inhibitor activity	8	SOCS3, SOCS1, COL6A3, SERPINE1, ANXA1, SERPING1, SERPINH1, ANXA2	0.0957859
GOTERM_CC_FAT	GO:0000267~cell fraction	19	CAV2, P4HB, CAV1, LYN, CALD1, MET, LMNA, RGS16, CD151, ITGB1, PTPN12, ANXA2, CTTN, FBLN1, CD36, ITGA5, SERPINE1, EGF, GRB14	0.0732169
KEGG_PATHWAY	hsa04012:ErbB signaling pathway	6	EGFR, PLCG1, ERBB2, CAMK2D, SHC1, EGF	0.0757885
GOTERM_CC_FAT	GO:0005584~collagen type I	2	COL1A2, COL1A1	0.0944791
GOTERM_CC_FAT	GO:0005589~collagen type VI	2	COL6A3, COL6A1	0.0944791
GOTERM_CC_FAT	GO:0070435~Shc-EGFR complex	2	EGFR, SHC1	0.0944791
KEGG_PATHWAY	hsa04360:Axon guidance	7	CXCR4, EFNA1, MET, FES, ITGB1, CXCL12, EPHA2	0.0972047

## Sheet: M4 down-regulated
Category	Term	Count	Genes	Benjamini (FDR)
GOTERM_CC_FAT	GO:0044451~nucleoplasm part	5	MYOD1, CTBP2, ARID4A, NPM1, TFDP1	0.0929084

## Sheet: M4 up-regulated
Category	Term	Count	Genes	Benjamini (FDR)
GOTERM_BP_FAT	GO:0007049~cell cycle	63	E2F1, LZTS1, DBF4, AURKA, PTTG1, AURKB, CDT1, CCNE1, MCM8, PSMC3IP, TUBG1, CCNA2, ASPM, CDC6, KIF11, LIG1, CCNF, SKP2, CDK6, ESPL1, MCM2, PBK, CDK4, MCM3, UBE2C, WEE1, CDK2, MCM6, MAD2L1, CCND2, BUB1B, MDM2, PELO, MAPK7, GADD45A, CKS1B, NEK2, FOXM1, CHEK1, CHEK2, CEP55, NCAPG, CENPA, BUB1, FBXO5, ERCC6L, EXO1, CDC20, BIRC5, NDC80, CDKN3, CDC25C, CDC25A, SMC4, CDC25B, CCNB1, CCNB2, PLK3, PLK1, CKS…	4.91294e-44
KEGG_PATHWAY	hsa04110:Cell cycle	35	E2F1, DBF4, CHEK1, PTTG1, CHEK2, CCNE1, BUB1, CCNA2, CDC6, SKP2, CDK6, ESPL1, CDC20, MCM2, MCM3, CDK4, CDC25C, MCM4, ORC1L, MCM5, CDC25A, CDK2, WEE1, MCM6, CDC25B, CCNB1, CCNB2, MAD2L1, CCND2, PLK1, PCNA, BUB1B, MDM2, GADD45B, GADD45A	6.1065e-39
GOTERM_BP_FAT	GO:0022403~cell cycle phase	46	E2F1, NEK2, DBF4, CHEK1, AURKA, PTTG1, CEP55, AURKB, CCNE1, NCAPG, PSMC3IP, BUB1, FBXO5, TUBG1, CCNA2, ASPM, ERCC6L, EXO1, CDC6, KIF11, CCNF, SKP2, CDK6, CDC20, BIRC5, NDC80, ESPL1, PBK, CDKN3, CDC25C, UBE2C, CDK4, CDC25A, WEE1, CDK2, SMC4, CDC25B, CCNB1, MAD2L1, CCNB2, CCND2, PLK1, CKS2, BUB1B, MDM2, GADD45A	4.8745e-36
GOTERM_BP_FAT	GO:0000278~mitotic cell cycle	44	E2F1, NEK2, DBF4, CHEK1, AURKA, PTTG1, CEP55, AURKB, CCNE1, CENPA, NCAPG, BUB1, FBXO5, CCNA2, ASPM, ERCC6L, CDC6, KIF11, CCNF, SKP2, CDK6, CDC20, BIRC5, NDC80, ESPL1, PBK, CDKN3, CDC25C, UBE2C, CDK4, CDC25A, WEE1, CDK2, SMC4, CDC25B, CCNB1, MAD2L1, CCNB2, CCND2, PLK1, BUB1B, MDM2, GADD45A, UBE2E1	1.22772e-35
GOTERM_BP_FAT	GO:0022402~cell cycle process	48	E2F1, NEK2, DBF4, CHEK1, AURKA, PTTG1, CEP55, AURKB, CCNE1, NCAPG, CENPA, PSMC3IP, BUB1, FBXO5, TUBG1, CCNA2, ASPM, ERCC6L, EXO1, CDC6, KIF11, CCNF, SKP2, CDK6, CDC20, BIRC5, NDC80, ESPL1, PBK, CDKN3, CDC25C, UBE2C, CDK4, CDC25A, WEE1, CDK2, SMC4, CDC25B, CCNB1, MAD2L1, CCNB2, CCND2, PLK1, CKS2, BUB1B, MDM2, GADD45A, UBE2E1	9.09924e-33
GOTERM_BP_FAT	GO:0051301~cell division	38	CKS1B, NEK2, CEP55, AURKB, PTTG1, CCNE1, NCAPG, BUB1, FBXO5, CCNA2, ASPM, ERCC6L, CDC6, KIF11, LIG1, CCNF, CDK6, CDC20, ESPL1, BIRC5, NDC80, UBE2C, CDK4, CDC25C, MCM5, CDC25A, WEE1, CDK2, SMC4, CDC25B, CCNB1, MAD2L1, CCNB2, CCND2, PLK1, CKS2, BUB1B, PELO	1.58013e-31
GOTERM_CC_FAT	GO:0005654~nucleoplasm	49	ITGB3BP, E2F1, DBF4, RBM4, MCM10, CDT1, CCNE1, MCM8, CCNA2, CDC6, POLH, LIG1, MCM2, MCM3, UBE2C, CDK4, MCM4, GTF2H2, ORC1L, MCM5, CDK2, WEE1, MCM6, RFC3, RFC4, RFC2, DDB2, MDM2, MAPK7, SNRPC, CKS1B, CHEK1, CHEK2, POLA2, RPA3, POLE2, FBXO5, HIST1H4J, ERCC1, RECQL5, CDC20, CDC25C, CDC25A, CDC25B, CCNB1, PLK1, PCNA, CHAF1B, UBE2E1	7.45498e-29
GOTERM_BP_FAT	GO:0000279~M phase	36	NEK2, CHEK1, AURKA, CEP55, AURKB, PTTG1, NCAPG, PSMC3IP, BUB1, FBXO5, TUBG1, CCNA2, ASPM, ERCC6L, EXO1, CDC6, KIF11, CCNF, CDC20, ESPL1, BIRC5, NDC80, PBK, CDC25C, UBE2C, CDC25A, WEE1, CDK2, SMC4, CDC25B, CCNB1, MAD2L1, CCNB2, PLK1, CKS2, BUB1B	3.40114e-27
GOTERM_BP_FAT	GO:0006260~DNA replication	30	DBF4, HUS1, RBM4, CHEK1, POLA2, MCM10, CDT1, RPA3, MCM8, POLE2, GINS1, CDC6, GINS2, POLH, LIG1, MCM2, MCM3, CDC25C, MCM4, ORC1L, CDK2, CDC25A, MCM5, MCM6, RFC3, RFC4, RFC2, PCNA, CHAF1A, CHAF1B	8.85999e-27
GOTERM_BP_FAT	GO:0000280~nuclear division	31	NEK2, AURKA, CEP55, AURKB, PTTG1, NCAPG, BUB1, FBXO5, CCNA2, ASPM, ERCC6L, CDC6, KIF11, CCNF, ESPL1, BIRC5, NDC80, CDC20, PBK, UBE2C, CDC25C, CDC25A, WEE1, CDK2, SMC4, CDC25B, CCNB1, CCNB2, MAD2L1, PLK1, BUB1B	2.53607e-26
GOTERM_BP_FAT	GO:0007067~mitosis	31	NEK2, AURKA, CEP55, AURKB, PTTG1, NCAPG, BUB1, FBXO5, CCNA2, ASPM, ERCC6L, CDC6, KIF11, CCNF, ESPL1, BIRC5, NDC80, CDC20, PBK, UBE2C, CDC25C, CDC25A, WEE1, CDK2, SMC4, CDC25B, CCNB1, CCNB2, MAD2L1, PLK1, BUB1B	2.53607e-26
GOTERM_BP_FAT	GO:0000087~M phase of mitotic cell cycle	31	NEK2, AURKA, CEP55, AURKB, PTTG1, NCAPG, BUB1, FBXO5, CCNA2, ASPM, ERCC6L, CDC6, KIF11, CCNF, ESPL1, BIRC5, NDC80, CDC20, PBK, UBE2C, CDC25C, CDC25A, WEE1, CDK2, SMC4, CDC25B, CCNB1, CCNB2, MAD2L1, PLK1, BUB1B	3.92295e-26
GOTERM_BP_FAT	GO:0048285~organelle fission	31	NEK2, AURKA, CEP55, AURKB, PTTG1, NCAPG, BUB1, FBXO5, CCNA2, ASPM, ERCC6L, CDC6, KIF11, CCNF, ESPL1, BIRC5, NDC80, CDC20, PBK, UBE2C, CDC25C, CDC25A, WEE1, CDK2, SMC4, CDC25B, CCNB1, CCNB2, MAD2L1, PLK1, BUB1B	6.94882e-26
GOTERM_BP_FAT	GO:0006259~DNA metabolic process	40	DBF4, HUS1, RBM4, CHEK1, POLA2, PTTG1, MCM10, CDT1, RPA3, MCM8, POLE2, PSMC3IP, ERCC1, EXO1, GINS1, GINS2, CDC6, RECQL5, POLH, LIG1, MCM2, MCM3, CDC25C, MCM4, ORC1L, MCM5, CDC25A, GTF2H2, CDK2, MCM6, EYA4, RFC3, RFC4, RFC2, PCNA, DDB2, RAD18, CHAF1A, CHAF1B, GADD45A	1.37613e-25
GOTERM_CC_FAT	GO:0031981~nuclear lumen	52	ITGB3BP, E2F1, DBF4, RBM4, MCM10, CDT1, CCNE1, MCM8, CCNA2, CDC6, POLH, LIG1, MCM2, MCM3, UBE2C, CDK4, MCM4, WEE1, ORC1L, MCM5, GTF2H2, CDK2, MCM6, RFC3, RFC4, RFC2, DDB2, MDM2, SNRPC, MAPK7, CKS1B, NEK2, LMNB2, CHEK1, CHEK2, POLA2, RPA3, POLE2, FBXO5, HIST1H4J, ERCC1, RECQL5, BIRC5, CDC20, CDC25C, CDC25A, CDC25B, CCNB1, PLK1, PCNA, CHAF1B, UBE2E1	2.10791e-22
GOTERM_CC_FAT	GO:0070013~intracellular organelle lumen	54	ITGB3BP, E2F1, DBF4, RBM4, MCM10, CDT1, CCNE1, MCM8, CCNA2, CDC6, POLH, LIG1, MCM2, MCM3, UBE2C, CDK4, TIMM44, MCM4, WEE1, ORC1L, MCM5, GTF2H2, CDK2, MCM6, RFC3, RFC4, RFC2, DDB2, MDM2, SNRPC, MAPK7, CKS1B, NEK2, LMNB2, CHEK1, CHEK2, POLA2, CALU, RPA3, POLE2, FBXO5, HIST1H4J, ERCC1, RECQL5, BIRC5, CDC20, CDC25C, CDC25A, CDC25B, CCNB1, PLK1, PCNA, CHAF1B, UBE2E1	2.56689e-20
GOTERM_BP_FAT	GO:0051726~regulation of cell cycle	30	E2F1, CKS1B, NEK2, HUS1, CHEK1, CHEK2, CDT1, BUB1, FBXO5, CCNA2, CDC6, SKP2, HERC5, CDK6, ESPL1, BIRC5, CDK4, UBE2C, CDC25C, CDKN3, CDK2, CDC25A, CCNB1, MAD2L1, CCND2, CKS2, BUB1B, MDM2, GADD45B, GADD45A	5.50183e-20
GOTERM_CC_FAT	GO:0043233~organelle lumen	54	ITGB3BP, E2F1, DBF4, RBM4, MCM10, CDT1, CCNE1, MCM8, CCNA2, CDC6, POLH, LIG1, MCM2, MCM3, UBE2C, CDK4, TIMM44, MCM4, WEE1, ORC1L, MCM5, GTF2H2, CDK2, MCM6, RFC3, RFC4, RFC2, DDB2, MDM2, SNRPC, MAPK7, CKS1B, NEK2, LMNB2, CHEK1, CHEK2, POLA2, CALU, RPA3, POLE2, FBXO5, HIST1H4J, ERCC1, RECQL5, BIRC5, CDC20, CDC25C, CDC25A, CDC25B, CCNB1, PLK1, PCNA, CHAF1B, UBE2E1	5.62419e-20
GOTERM_CC_FAT	GO:0031974~membrane-enclosed lumen	54	ITGB3BP, E2F1, DBF4, RBM4, MCM10, CDT1, CCNE1, MCM8, CCNA2, CDC6, POLH, LIG1, MCM2, MCM3, UBE2C, CDK4, TIMM44, MCM4, WEE1, ORC1L, MCM5, GTF2H2, CDK2, MCM6, RFC3, RFC4, RFC2, DDB2, MDM2, SNRPC, MAPK7, CKS1B, NEK2, LMNB2, CHEK1, CHEK2, POLA2, CALU, RPA3, POLE2, FBXO5, HIST1H4J, ERCC1, RECQL5, BIRC5, CDC20, CDC25C, CDC25A, CDC25B, CCNB1, PLK1, PCNA, CHAF1B, UBE2E1	1.12673e-19
GOTERM_CC_FAT	GO:0005694~chromosome	31	ITGB3BP, NEK2, CHEK1, AURKB, POLA2, RPA3, VDR, CENPA, NCAPG, BUB1, TUBG1, ASF1B, HIST1H4J, ERCC1, ERCC6L, HIST1H1C, BIRC5, NDC80, MCM2, MCM3, ORC1L, CDK2, SMC4, RFC3, RFC4, MAD2L1, BAZ1B, RFC2, PCNA, BUB1B, RAD18	2.20257e-19
GOTERM_CC_FAT	GO:0044427~chromosomal part	29	ITGB3BP, CHEK1, AURKB, POLA2, RPA3, VDR, CENPA, NCAPG, BUB1, ASF1B, HIST1H4J, ERCC1, ERCC6L, HIST1H1C, BIRC5, NDC80, MCM2, MCM3, CDK2, ORC1L, SMC4, RFC3, RFC4, MAD2L1, BAZ1B, RFC2, PCNA, BUB1B, RAD18	2.86833e-19
GOTERM_BP_FAT	GO:0051329~interphase of mitotic cell cycle	17	E2F1, CDC6, DBF4, SKP2, CDK6, CHEK1, BIRC5, CDC25C, CDKN3, CDK4, CDK2, CDC25A, CCNB1, CCNE1, CCND2, MDM2, GADD45A	1.39888e-14
GOTERM_BP_FAT	GO:0051325~interphase	17	E2F1, CDC6, DBF4, SKP2, CDK6, CHEK1, BIRC5, CDC25C, CDKN3, CDK4, CDK2, CDC25A, CCNB1, CCNE1, CCND2, MDM2, GADD45A	2.60902e-14
KEGG_PATHWAY	hsa03030:DNA replication	13	LIG1, MCM2, POLA2, MCM3, MCM4, MCM5, RPA3, MCM6, RFC3, RFC4, POLE2, RFC2, PCNA	5.82867e-14
GOTERM_BP_FAT	GO:0006974~response to DNA damage stimulus	25	RBM4, HUS1, CHEK1, PTTG1, CHEK2, RPA3, POLE2, CCNA2, ERCC1, EXO1, RECQL5, POLH, LIG1, GTF2H2, EYA4, RFC3, RFC4, BAZ1B, RFC2, DDB2, PCNA, RAD18, CHAF1A, CHAF1B, GADD45A	2.79887e-13
GOTERM_BP_FAT	GO:0006281~DNA repair	22	EXO1, RECQL5, POLH, LIG1, HUS1, RBM4, CHEK1, PTTG1, GTF2H2, RPA3, EYA4, RFC3, RFC4, POLE2, RFC2, DDB2, PCNA, RAD18, CHAF1A, GADD45A, CHAF1B, ERCC1	1.06659e-12
GOTERM_CC_FAT	GO:0043232~intracellular non-membrane-bounded organelle	51	ITGB3BP, LZTS1, RBM4, AURKA, AURKB, CCNE1, TUBG1, ASPM, CDC6, KIF11, HIST1H1C, POLH, ESPL1, MCM2, MCM3, MCM4, ORC1L, CDK2, RFC3, MAD2L1, RFC4, BAZ1B, RFC2, BUB1B, RAD18, MDM2, NEK2, LMNB2, FHL3, CHEK1, POLA2, CEP55, RPA3, VDR, NCAPG, CENPA, BUB1, FBXO5, ASF1B, HIST1H4J, ERCC1, ERCC6L, BIRC5, NDC80, CDC20, SMC4, CDC25B, CCNB1, CCNB2, PLK1, PCNA	3.69328e-11
GOTERM_CC_FAT	GO:0043228~non-membrane-bounded organelle	51	ITGB3BP, LZTS1, RBM4, AURKA, AURKB, CCNE1, TUBG1, ASPM, CDC6, KIF11, HIST1H1C, POLH, ESPL1, MCM2, MCM3, MCM4, ORC1L, CDK2, RFC3, MAD2L1, RFC4, BAZ1B, RFC2, BUB1B, RAD18, MDM2, NEK2, LMNB2, FHL3, CHEK1, POLA2, CEP55, RPA3, VDR, NCAPG, CENPA, BUB1, FBXO5, ASF1B, HIST1H4J, ERCC1, ERCC6L, BIRC5, NDC80, CDC20, SMC4, CDC25B, CCNB1, CCNB2, PLK1, PCNA	3.69328e-11
GOTERM_CC_FAT	GO:0000793~condensed chromosome	14	NEK2, NDC80, CHEK1, AURKB, CDK2, SMC4, MAD2L1, BAZ1B, NCAPG, CENPA, BUB1, BUB1B, TUBG1, ERCC6L	1.98208e-10
KEGG_PATHWAY	hsa04115:p53 signaling pathway	13	CHEK1, CDK6, CHEK2, CDK4, CDK2, CCNB1, CCNE1, CCNB2, CCND2, DDB2, MDM2, GADD45B, GADD45A	1.74319e-10
GOTERM_BP_FAT	GO:0007346~regulation of mitotic cell cycle	15	CDC6, NEK2, HUS1, BIRC5, ESPL1, UBE2C, CDC25C, CDK2, CDT1, MAD2L1, BUB1, BUB1B, FBXO5, MDM2, CCNA2	1.60857e-09
GOTERM_BP_FAT	GO:0033554~cellular response to stress	25	RBM4, HUS1, CHEK1, PTTG1, CHEK2, RPA3, POLE2, CCNA2, ERCC1, EXO1, RECQL5, POLH, LIG1, GTF2H2, EYA4, RFC3, RFC4, BAZ1B, RFC2, DDB2, PCNA, RAD18, CHAF1A, CHAF1B, GADD45A	1.89077e-09
GOTERM_CC_FAT	GO:0005819~spindle	14	CDC6, KIF11, NEK2, AURKA, CDC20, BIRC5, AURKB, MAD2L1, PLK1, BUB1, BUB1B, FBXO5, TUBG1, ASPM	9.47652e-10
GOTERM_CC_FAT	GO:0005657~replication fork	9	RFC3, RFC4, RFC2, PCNA, RAD18, CHEK1, POLA2, MCM3, RPA3	1.01398e-09
GOTERM_MF_FAT	GO:0005524~ATP binding	38	NEK2, CHEK1, AURKA, MAPKAPK2, CHEK2, AURKB, MCM8, STK40, DHX34, BUB1, ERCC6L, CDC6, RECQL5, KIF11, LIG1, CDK6, MCM2, PBK, MCM3, UBE2C, CDK4, TIMM44, MCM4, ORC1L, MCM5, CDK2, WEE1, SMC4, MCM6, RFC3, RFC4, PLK3, BAZ1B, RFC2, PLK1, BUB1B, MAPK7, UBE2E1	1.57942e-08
GOTERM_MF_FAT	GO:0032559~adenyl ribonucleotide binding	38	NEK2, CHEK1, AURKA, MAPKAPK2, CHEK2, AURKB, MCM8, STK40, DHX34, BUB1, ERCC6L, CDC6, RECQL5, KIF11, LIG1, CDK6, MCM2, PBK, MCM3, UBE2C, CDK4, TIMM44, MCM4, ORC1L, MCM5, CDK2, WEE1, SMC4, MCM6, RFC3, RFC4, PLK3, BAZ1B, RFC2, PLK1, BUB1B, MAPK7, UBE2E1	1.16782e-08
GOTERM_CC_FAT	GO:0015630~microtubule cytoskeleton	22	CDC6, KIF11, NEK2, CHEK1, ESPL1, AURKA, CDC20, BIRC5, AURKB, CEP55, MCM3, CDC25B, CCNB1, CCNE1, CCNB2, MAD2L1, PLK1, BUB1, BUB1B, FBXO5, TUBG1, ASPM	5.50808e-09
GOTERM_MF_FAT	GO:0030554~adenyl nucleotide binding	38	NEK2, CHEK1, AURKA, MAPKAPK2, CHEK2, AURKB, MCM8, STK40, DHX34, BUB1, ERCC6L, CDC6, RECQL5, KIF11, LIG1, CDK6, MCM2, PBK, MCM3, UBE2C, CDK4, TIMM44, MCM4, ORC1L, MCM5, CDK2, WEE1, SMC4, MCM6, RFC3, RFC4, PLK3, BAZ1B, RFC2, PLK1, BUB1B, MAPK7, UBE2E1	3.47975e-08
GOTERM_BP_FAT	GO:0000079~regulation of cyclin-dependent protein kinase activity	10	CKS1B, CDC6, CCND2, HERC5, CKS2, CHEK1, CDKN3, CDC25C, GADD45A, CDC25A	2.60794e-08
GOTERM_BP_FAT	GO:0006289~nucleotide-excision repair	10	RFC3, RFC4, POLE2, RFC2, LIG1, DDB2, PCNA, ERCC1, GTF2H2, RPA3	2.94158e-08
GOTERM_MF_FAT	GO:0001883~purine nucleoside binding	38	NEK2, CHEK1, AURKA, MAPKAPK2, CHEK2, AURKB, MCM8, STK40, DHX34, BUB1, ERCC6L, CDC6, RECQL5, KIF11, LIG1, CDK6, MCM2, PBK, MCM3, UBE2C, CDK4, TIMM44, MCM4, ORC1L, MCM5, CDK2, WEE1, SMC4, MCM6, RFC3, RFC4, PLK3, BAZ1B, RFC2, PLK1, BUB1B, MAPK7, UBE2E1	4.00862e-08
GOTERM_MF_FAT	GO:0001882~nucleoside binding	38	NEK2, CHEK1, AURKA, MAPKAPK2, CHEK2, AURKB, MCM8, STK40, DHX34, BUB1, ERCC6L, CDC6, RECQL5, KIF11, LIG1, CDK6, MCM2, PBK, MCM3, UBE2C, CDK4, TIMM44, MCM4, ORC1L, MCM5, CDK2, WEE1, SMC4, MCM6, RFC3, RFC4, PLK3, BAZ1B, RFC2, PLK1, BUB1B, MAPK7, UBE2E1	3.89254e-08
KEGG_PATHWAY	hsa03420:Nucleotide excision repair	10	RFC3, RFC4, POLE2, RFC2, LIG1, DDB2, PCNA, ERCC1, GTF2H2, RPA3	1.50007e-08
GOTERM_MF_FAT	GO:0032555~purine ribonucleotide binding	40	NEK2, CHEK1, AURKA, MAPKAPK2, CHEK2, AURKB, MCM8, STK40, SRPR, DHX34, BUB1, TUBG1, ERCC6L, CDC6, RECQL5, KIF11, LIG1, CDK6, MCM2, PBK, MCM3, UBE2C, CDK4, TIMM44, MCM4, ORC1L, MCM5, WEE1, CDK2, SMC4, MCM6, RFC3, RFC4, PLK3, BAZ1B, RFC2, PLK1, BUB1B, MAPK7, UBE2E1	8.88963e-08
GOTERM_MF_FAT	GO:0032553~ribonucleotide binding	40	NEK2, CHEK1, AURKA, MAPKAPK2, CHEK2, AURKB, MCM8, STK40, SRPR, DHX34, BUB1, TUBG1, ERCC6L, CDC6, RECQL5, KIF11, LIG1, CDK6, MCM2, PBK, MCM3, UBE2C, CDK4, TIMM44, MCM4, ORC1L, MCM5, WEE1, CDK2, SMC4, MCM6, RFC3, RFC4, PLK3, BAZ1B, RFC2, PLK1, BUB1B, MAPK7, UBE2E1	8.88963e-08
GOTERM_BP_FAT	GO:0007051~spindle organization	9	KIF11, CKS2, BUB1B, FBXO5, NDC80, ESPL1, AURKA, TUBG1, UBE2C	1.29139e-07
GOTERM_BP_FAT	GO:0006297~nucleotide-excision repair, DNA gap filling	7	RFC3, RFC4, POLE2, RFC2, LIG1, PCNA, RPA3	1.34477e-07
KEGG_PATHWAY	hsa04114:Oocyte meiosis	13	AURKA, CDC20, ESPL1, PTTG1, CDC25C, CDK2, CCNB1, CCNE1, MAD2L1, CCNB2, PLK1, BUB1, FBXO5	3.45538e-08
GOTERM_CC_FAT	GO:0005815~microtubule organizing center	15	NEK2, CHEK1, AURKA, BIRC5, ESPL1, CEP55, MCM3, CDC25B, CCNB1, CCNE1, MAD2L1, PLK1, BUB1, BUB1B, TUBG1	6.28545e-08
GOTERM_MF_FAT	GO:0004674~protein serine/threonine kinase activity	19	NEK2, HUS1, CDK6, CHEK1, AURKA, MAPKAPK2, CHEK2, PBK, AURKB, CDK4, GTF2H2, WEE1, CDK2, PLK3, STK40, PLK1, BUB1, BUB1B, MAPK7	2.33758e-07
GOTERM_MF_FAT	GO:0017076~purine nucleotide binding	40	NEK2, CHEK1, AURKA, MAPKAPK2, CHEK2, AURKB, MCM8, STK40, SRPR, DHX34, BUB1, TUBG1, ERCC6L, CDC6, RECQL5, KIF11, LIG1, CDK6, MCM2, PBK, MCM3, UBE2C, CDK4, TIMM44, MCM4, ORC1L, MCM5, WEE1, CDK2, SMC4, MCM6, RFC3, RFC4, PLK3, BAZ1B, RFC2, PLK1, BUB1B, MAPK7, UBE2E1	2.3477e-07
GOTERM_BP_FAT	GO:0051276~chromosome organization	20	HIST1H1C, NEK2, RBM4, ESPL1, NDC80, MCM2, PTTG1, SMC4, EYA4, MAD2L1, BAZ1B, CENPA, NCAPG, PELO, ASF1B, CHAF1A, HIST1H4J, CHAF1B, ERCC1, UBE2E1	7.45241e-07
GOTERM_BP_FAT	GO:0006261~DNA-dependent DNA replication	9	RFC3, RFC4, POLE2, MCM2, MCM3, MCM4, ORC1L, MCM5, MCM6	9.17577e-07
GOTERM_BP_FAT	GO:0000226~microtubule cytoskeleton organization	12	KIF11, NEK2, CENPA, CKS2, BUB1B, FBXO5, NDC80, ESPL1, AURKA, TUBG1, UBE2C, GADD45A	1.39048e-06
GOTERM_BP_FAT	GO:0000075~cell cycle checkpoint	10	CDC6, MAD2L1, HUS1, BUB1, BUB1B, BIRC5, CHEK1, CHEK2, CCNA2, CDT1	2.16697e-06
GOTERM_CC_FAT	GO:0005813~centrosome	13	NEK2, AURKA, BIRC5, ESPL1, CHEK1, CEP55, MCM3, CDC25B, CCNB1, CCNE1, PLK1, BUB1B, TUBG1	1.16716e-06
GOTERM_CC_FAT	GO:0000922~spindle pole	7	KIF11, MAD2L1, NEK2, PLK1, BUB1, TUBG1, ASPM	1.98354e-06
GOTERM_BP_FAT	GO:0051321~meiotic cell cycle	10	EXO1, NEK2, PLK1, PSMC3IP, CKS2, FBXO5, CHEK1, ESPL1, TUBG1, CDC25B	4.75487e-06
GOTERM_BP_FAT	GO:0006270~DNA replication initiation	6	MCM2, MCM3, MCM4, ORC1L, MCM5, MCM6	4.63329e-06
KEGG_PATHWAY	hsa03430:Mismatch repair	7	EXO1, RFC3, RFC4, RFC2, LIG1, PCNA, RPA3	1.39867e-06
GOTERM_MF_FAT	GO:0000166~nucleotide binding	41	NEK2, RBM4, CHEK1, AURKA, MAPKAPK2, CHEK2, AURKB, MCM8, STK40, SRPR, DHX34, BUB1, TUBG1, ERCC6L, CDC6, RECQL5, KIF11, LIG1, CDK6, MCM2, PBK, MCM3, UBE2C, CDK4, TIMM44, MCM4, ORC1L, MCM5, WEE1, CDK2, SMC4, MCM6, RFC3, RFC4, PLK3, BAZ1B, RFC2, PLK1, BUB1B, MAPK7, UBE2E1	5.17663e-06
GOTERM_CC_FAT	GO:0044430~cytoskeletal part	24	CDC6, LZTS1, KIF11, LMNB2, NEK2, FHL3, CHEK1, ESPL1, AURKA, CDC20, BIRC5, AURKB, CEP55, MCM3, CDC25B, CCNB1, CCNE1, MAD2L1, PLK1, BUB1, BUB1B, FBXO5, TUBG1, ASPM	3.183e-06
GOTERM_MF_FAT	GO:0004672~protein kinase activity	20	NEK2, HUS1, CDK6, CHEK1, AURKA, MAPKAPK2, CHEK2, PBK, AURKB, CDK4, GTF2H2, WEE1, CDK2, PLK3, BAZ1B, STK40, PLK1, BUB1, BUB1B, MAPK7	5.9645e-06
GOTERM_CC_FAT	GO:0000228~nuclear chromosome	11	VDR, NEK2, BUB1, BIRC5, CHEK1, POLA2, MCM2, TUBG1, MCM3, ERCC1, RPA3	3.34784e-06
GOTERM_CC_FAT	GO:0000775~chromosome, centromeric region	10	ITGB3BP, MAD2L1, BAZ1B, CENPA, BUB1, BUB1B, BIRC5, NDC80, AURKB, ERCC6L	3.25646e-06
GOTERM_BP_FAT	GO:0000080~G1 phase of mitotic cell cycle	6	E2F1, CDC6, MDM2, CDK6, CDC25C, CDK2	8.65767e-06
KEGG_PATHWAY	hsa04914:Progesterone-mediated oocyte maturation	10	CCNB1, MAD2L1, CCNB2, PLK1, BUB1, CDC25C, CCNA2, CDC25A, CDK2, CDC25B	3.76169e-06
GOTERM_BP_FAT	GO:0051318~G1 phase	6	E2F1, CDC6, MDM2, CDK6, CDC25C, CDK2	1.94793e-05
GOTERM_CC_FAT	GO:0000307~cyclin-dependent protein kinase holoenzyme complex	5	CCND2, PCNA, CDK6, CDK4, CDK2	8.88464e-06
GOTERM_BP_FAT	GO:0051327~M phase of meiotic cell cycle	9	EXO1, NEK2, PLK1, PSMC3IP, CKS2, FBXO5, CHEK1, ESPL1, CDC25B	4.4111e-05
GOTERM_BP_FAT	GO:0007126~meiosis	9	EXO1, NEK2, PLK1, PSMC3IP, CKS2, FBXO5, CHEK1, ESPL1, CDC25B	4.4111e-05
GOTERM_BP_FAT	GO:0051439~regulation of ubiquitin-protein ligase activity during mitotic cell cycle	8	CCNB1, MAD2L1, PLK1, BUB1B, FBXO5, CDC20, UBE2C, UBE2E1	5.48903e-05
GOTERM_BP_FAT	GO:0051438~regulation of ubiquitin-protein ligase activity	8	CCNB1, MAD2L1, PLK1, BUB1B, FBXO5, CDC20, UBE2C, UBE2E1	0.000100733
GOTERM_BP_FAT	GO:0010564~regulation of cell cycle process	9	MAD2L1, NEK2, BUB1, FBXO5, BIRC5, ESPL1, CDC25C, UBE2C, CDT1	0.000125796
GOTERM_BP_FAT	GO:0006796~phosphate metabolic process	24	NEK2, HUS1, CDK6, CHEK1, AURKA, MAPKAPK2, AURKB, PBK, CHEK2, CDK4, CDC25C, CDKN3, CDC25A, CDK2, WEE1, CDC25B, PLK3, BAZ1B, STK40, PTP4A3, PLK1, BUB1, MAPK7, GADD45B	0.000122266
GOTERM_BP_FAT	GO:0006793~phosphorus metabolic process	24	NEK2, HUS1, CDK6, CHEK1, AURKA, MAPKAPK2, AURKB, PBK, CHEK2, CDK4, CDC25C, CDKN3, CDC25A, CDK2, WEE1, CDC25B, PLK3, BAZ1B, STK40, PTP4A3, PLK1, BUB1, MAPK7, GADD45B	0.000122266
GOTERM_BP_FAT	GO:0007059~chromosome segregation	8	MAD2L1, NEK2, NCAPG, BIRC5, NDC80, ESPL1, PTTG1, SMC4	0.000119035
GOTERM_BP_FAT	GO:0051340~regulation of ligase activity	8	CCNB1, MAD2L1, PLK1, BUB1B, FBXO5, CDC20, UBE2C, UBE2E1	0.000119035
GOTERM_BP_FAT	GO:0006323~DNA packaging	9	HIST1H1C, CENPA, NCAPG, MCM2, ASF1B, CHAF1A, CHAF1B, HIST1H4J, SMC4	0.000140269
GOTERM_BP_FAT	GO:0000082~G1/S transition of mitotic cell cycle	7	CCNE1, CCND2, DBF4, SKP2, CDKN3, CDK4, CDC25A	0.000156341
GOTERM_CC_FAT	GO:0005663~DNA replication factor C complex	4	RFC3, RFC4, RFC2, PCNA	7.35388e-05
GOTERM_CC_FAT	GO:0000779~condensed chromosome, centromeric region	7	MAD2L1, CENPA, BUB1, BUB1B, NDC80, AURKB, ERCC6L	7.92306e-05
GOTERM_BP_FAT	GO:0048015~phosphoinositide-mediated signaling	8	RFC4, CKS2, PCNA, BUB1B, NDC80, AURKA, UBE2C, HIST1H4J	0.000191111
GOTERM_BP_FAT	GO:0007017~microtubule-based process	12	KIF11, NEK2, CENPA, CKS2, BUB1B, FBXO5, NDC80, ESPL1, AURKA, TUBG1, UBE2C, GADD45A	0.000190592
GOTERM_BP_FAT	GO:0006468~protein amino acid phosphorylation	19	NEK2, HUS1, CDK6, CHEK1, AURKA, MAPKAPK2, CHEK2, PBK, AURKB, CDK4, WEE1, CDK2, PLK3, BAZ1B, STK40, PLK1, BUB1, MAPK7, GADD45B	0.00022247
GOTERM_BP_FAT	GO:0007089~traversing start control point of mitotic cell cycle	4	CDC6, MDM2, CDC25C, CDK2	0.000223955
GOTERM_BP_FAT	GO:0000070~mitotic sister chromatid segregation	6	MAD2L1, NEK2, NCAPG, NDC80, ESPL1, SMC4	0.000227617
GOTERM_MF_FAT	GO:0003677~DNA binding	38	E2F1, LZTS1, FOXM1, POLA2, PTTG1, MYBL2, CDT1, RPA3, VDR, MCM8, POLE2, CENPA, PSMC3IP, HIST1H4J, ERCC1, PHC2, ERCC6L, EXO1, KLF6, HIST1H1C, POLH, LIG1, MCM2, CSDA, MCM3, MCM4, ORC1L, MCM5, GTF2H2, MCM6, RFC3, RFC4, BAZ1B, RFC2, DDB2, PCNA, TGIF1, RAD18	0.000254906
GOTERM_BP_FAT	GO:0000819~sister chromatid segregation	6	MAD2L1, NEK2, NCAPG, NDC80, ESPL1, SMC4	0.000255477
GOTERM_MF_FAT	GO:0043566~structure-specific DNA binding	9	EXO1, KLF6, PCNA, RAD18, CSDA, MCM4, ERCC1, MCM6, RPA3	0.000364167
GOTERM_BP_FAT	GO:0031396~regulation of protein ubiquitination	8	CCNB1, MAD2L1, PLK1, BUB1B, FBXO5, CDC20, UBE2C, UBE2E1	0.00038434
GOTERM_CC_FAT	GO:0005829~cytosol	25	ITGB3BP, NEK2, PTTG1, MAPKAPK2, CCNE1, FBXO5, TUBG1, CDC6, GGH, BIRC5, CDC20, CDK4, UBE2C, CDC25C, CDK2, ORC1L, CDC25B, CCNB1, CCNB2, MAD2L1, PLK1, MDM2, BUB1B, CHAF1B, UBE2E1	0.00020631
GOTERM_BP_FAT	GO:0000086~G2/M transition of mitotic cell cycle	5	CCNB1, BIRC5, CHEK1, GADD45A, CDK2	0.00045788
GOTERM_BP_FAT	GO:0006310~DNA recombination	8	EXO1, RECQL5, LIG1, PSMC3IP, HUS1, RBM4, CHEK1, ERCC1	0.000505422
GOTERM_CC_FAT	GO:0005856~cytoskeleton	25	LZTS1, LMNB2, NEK2, FHL3, AURKA, CHEK1, AURKB, CEP55, CCNE1, BUB1, FBXO5, TUBG1, ASPM, CDC6, KIF11, ESPL1, BIRC5, CDC20, MCM3, CDC25B, CCNB1, CCNB2, MAD2L1, PLK1, BUB1B	0.000365723
GOTERM_CC_FAT	GO:0000777~condensed chromosome kinetochore	6	MAD2L1, CENPA, BUB1, BUB1B, NDC80, ERCC6L	0.000525955
GOTERM_BP_FAT	GO:0031570~DNA integrity checkpoint	6	CDC6, HUS1, CHEK1, CHEK2, CCNA2, CDT1	0.00126212
GOTERM_BP_FAT	GO:0006334~nucleosome assembly	7	HIST1H1C, CENPA, MCM2, ASF1B, CHAF1A, CHAF1B, HIST1H4J	0.00125297
GOTERM_BP_FAT	GO:0008283~cell proliferation	14	E2F1, GINS1, CKS1B, SKP2, CDC25C, CDC25A, PLK1, PCNA, CKS2, BUB1, BUB1B, PELO, ERCC1, ASPM	0.00125053
GOTERM_BP_FAT	GO:0031497~chromatin assembly	7	HIST1H1C, CENPA, MCM2, ASF1B, CHAF1A, CHAF1B, HIST1H4J	0.00146512
GOTERM_BP_FAT	GO:0006333~chromatin assembly or disassembly	8	BAZ1B, HIST1H1C, CENPA, MCM2, ASF1B, CHAF1A, CHAF1B, HIST1H4J	0.00153986
GOTERM_BP_FAT	GO:0065004~protein-DNA complex assembly	7	HIST1H1C, CENPA, MCM2, ASF1B, CHAF1A, CHAF1B, HIST1H4J	0.00181058
GOTERM_BP_FAT	GO:0016310~phosphorylation	19	NEK2, HUS1, CDK6, CHEK1, AURKA, MAPKAPK2, CHEK2, PBK, AURKB, CDK4, WEE1, CDK2, PLK3, BAZ1B, STK40, PLK1, BUB1, MAPK7, GADD45B	0.00183012
GOTERM_BP_FAT	GO:0034728~nucleosome organization	7	HIST1H1C, CENPA, MCM2, ASF1B, CHAF1A, CHAF1B, HIST1H4J	0.00196803
GOTERM_BP_FAT	GO:0045859~regulation of protein kinase activity	12	CKS1B, CDC6, CCND2, HERC5, CKS2, CHEK1, CDKN3, CDC25C, GADD45B, GADD45A, CDC25A, CDC25B	0.00229177
GOTERM_BP_FAT	GO:0043549~regulation of kinase activity	12	CKS1B, CDC6, CCND2, HERC5, CKS2, CHEK1, CDKN3, CDC25C, GADD45B, GADD45A, CDC25A, CDC25B	0.00302985
GOTERM_BP_FAT	GO:0051436~negative regulation of ubiquitin-protein ligase activity during mitotic cell cycle	6	MAD2L1, BUB1B, FBXO5, CDC20, UBE2C, UBE2E1	0.00304063
GOTERM_BP_FAT	GO:0031145~anaphase-promoting complex-dependent proteasomal ubiquitin-dependent protein catabolic process	6	CCNB1, MAD2L1, BUB1B, CDC20, UBE2C, UBE2E1	0.00304063
GOTERM_BP_FAT	GO:0051352~negative regulation of ligase activity	6	MAD2L1, BUB1B, FBXO5, CDC20, UBE2C, UBE2E1	0.00344786
GOTERM_BP_FAT	GO:0051444~negative regulation of ubiquitin-protein ligase activity	6	MAD2L1, BUB1B, FBXO5, CDC20, UBE2C, UBE2E1	0.00344786
GOTERM_CC_FAT	GO:0000776~kinetochore	6	MAD2L1, CENPA, BUB1, BUB1B, NDC80, ERCC6L	0.00194943
GOTERM_BP_FAT	GO:0051437~positive regulation of ubiquitin-protein ligase activity during mitotic cell cycle	6	CCNB1, PLK1, FBXO5, CDC20, UBE2C, UBE2E1	0.0036348
GOTERM_CC_FAT	GO:0044454~nuclear chromosome part	7	VDR, BUB1, POLA2, MCM2, MCM3, ERCC1, RPA3	0.0020455
GOTERM_BP_FAT	GO:0051338~regulation of transferase activity	12	CKS1B, CDC6, CCND2, HERC5, CKS2, CHEK1, CDKN3, CDC25C, GADD45B, GADD45A, CDC25A, CDC25B	0.00403048
GOTERM_BP_FAT	GO:0051443~positive regulation of ubiquitin-protein ligase activity	6	CCNB1, PLK1, FBXO5, CDC20, UBE2C, UBE2E1	0.00402917
GOTERM_BP_FAT	GO:0007010~cytoskeleton organization	13	KIF11, NEK2, FHL3, AURKA, NDC80, ESPL1, UBE2C, CENPA, CKS2, FBXO5, BUB1B, TUBG1, GADD45A	0.00397285
GOTERM_CC_FAT	GO:0005816~spindle pole body	3	MAD2L1, BUB1, TUBG1	0.00228261
GOTERM_BP_FAT	GO:0051351~positive regulation of ligase activity	6	CCNB1, PLK1, FBXO5, CDC20, UBE2C, UBE2E1	0.00474648
GOTERM_BP_FAT	GO:0031397~negative regulation of protein ubiquitination	6	MAD2L1, BUB1B, FBXO5, CDC20, UBE2C, UBE2E1	0.00497825
GOTERM_BP_FAT	GO:0051052~regulation of DNA metabolic process	7	CDC6, POLH, HUS1, PCNA, ERCC1, CDK2, CDT1	0.00496673
GOTERM_BP_FAT	GO:0000212~meiotic spindle organization	3	FBXO5, ESPL1, TUBG1	0.00511291
GOTERM_CC_FAT	GO:0032993~protein-DNA complex	6	HIST1H1C, CENPA, POLA2, MCM3, HIST1H4J, RPA3	0.00291152
KEGG_PATHWAY	hsa05222:Small cell lung cancer	7	E2F1, CCNE1, CKS1B, SKP2, CDK6, CDK4, CDK2	0.00239154
GOTERM_BP_FAT	GO:0007093~mitotic cell cycle checkpoint	5	MAD2L1, HUS1, BUB1, BUB1B, CCNA2	0.00552432
GOTERM_MF_FAT	GO:0033170~protein-DNA loading ATPase activity	3	RFC3, RFC4, RFC2	0.0100585
GOTERM_MF_FAT	GO:0003689~DNA clamp loader activity	3	RFC3, RFC4, RFC2	0.0100585
GOTERM_CC_FAT	GO:0000785~chromatin	8	VDR, BAZ1B, HIST1H1C, CENPA, RAD18, MCM2, ASF1B, HIST1H4J	0.00447724
GOTERM_BP_FAT	GO:0006290~pyrimidine dimer repair	3	POLH, DDB2, ERCC1	0.00821719
GOTERM_BP_FAT	GO:0031398~positive regulation of protein ubiquitination	6	CCNB1, PLK1, FBXO5, CDC20, UBE2C, UBE2E1	0.00827522
GOTERM_BP_FAT	GO:0032270~positive regulation of cellular protein metabolic process	9	CCNB1, CCND2, PLK1, MDM2, FBXO5, CDC20, CDK4, UBE2C, UBE2E1	0.00908992
GOTERM_BP_FAT	GO:0000718~nucleotide-excision repair, DNA damage removal	4	DDB2, ERCC1, GTF2H2, RPA3	0.00907963
GOTERM_BP_FAT	GO:0019932~second-messenger-mediated signaling	9	PTHLH, RFC4, CKS2, PCNA, BUB1B, NDC80, AURKA, UBE2C, HIST1H4J	0.0093449
GOTERM_MF_FAT	GO:0003697~single-stranded DNA binding	5	CSDA, MCM4, ERCC1, MCM6, RPA3	0.0144282
GOTERM_BP_FAT	GO:0051247~positive regulation of protein metabolic process	9	CCNB1, CCND2, PLK1, MDM2, FBXO5, CDC20, CDK4, UBE2C, UBE2E1	0.0114343
GOTERM_BP_FAT	GO:0051640~organelle localization	6	CENPA, TMED10, BIRC5, NDC80, ESPL1, ASPM	0.0116471
GOTERM_BP_FAT	GO:0044265~cellular macromolecule catabolic process	16	SKP2, HERC5, CDC20, UBE2C, GTF2H2, RPA3, CCNB1, MAD2L1, DDB2, BUB1B, RAD18, MDM2, FBXO5, PSENEN, ERCC1, UBE2E1	0.0118846
GOTERM_BP_FAT	GO:0010605~negative regulation of macromolecule metabolic process	16	E2F1, CDC6, HUS1, SKP2, CDC20, UBE2C, CSDA, CDT1, VDR, MAD2L1, BUB1B, TGIF1, FBXO5, MDM2, ERCC1, UBE2E1	0.0132632
GOTERM_BP_FAT	GO:0051783~regulation of nuclear division	5	MAD2L1, NEK2, BUB1, ESPL1, CDC25C	0.0131332
GOTERM_BP_FAT	GO:0007088~regulation of mitosis	5	MAD2L1, NEK2, BUB1, ESPL1, CDC25C	0.0131332
GOTERM_BP_FAT	GO:0048146~positive regulation of fibroblast proliferation	4	TGIF1, CDK6, CDK4, CCNA2	0.013605
GOTERM_BP_FAT	GO:0006325~chromatin organization	11	EYA4, BAZ1B, HIST1H1C, CENPA, RBM4, MCM2, ASF1B, CHAF1A, CHAF1B, HIST1H4J, UBE2E1	0.0135626
GOTERM_BP_FAT	GO:0034622~cellular macromolecular complex assembly	10	HIST1H1C, CENPA, FBXO5, MCM2, SNRPC, TUBG1, ASF1B, CHAF1A, CHAF1B, HIST1H4J	0.0147309
GOTERM_MF_FAT	GO:0004725~protein tyrosine phosphatase activity	6	EYA4, PTP4A3, CDKN3, CDC25C, CDC25A, CDC25B	0.0203873
GOTERM_BP_FAT	GO:0009411~response to UV	5	POLH, HUS1, DDB2, ERCC1, GTF2H2	0.0151699
GOTERM_BP_FAT	GO:0043161~proteasomal ubiquitin-dependent protein catabolic process	6	CCNB1, MAD2L1, BUB1B, CDC20, UBE2C, UBE2E1	0.0166416
GOTERM_BP_FAT	GO:0010498~proteasomal protein catabolic process	6	CCNB1, MAD2L1, BUB1B, CDC20, UBE2C, UBE2E1	0.0166416
GOTERM_BP_FAT	GO:0006275~regulation of DNA replication	5	CDC6, HUS1, PCNA, CDK2, CDT1	0.0177825
GOTERM_BP_FAT	GO:0042325~regulation of phosphorylation	12	CKS1B, CDC6, CCND2, HERC5, CKS2, CHEK1, CDKN3, CDC25C, GADD45B, GADD45A, CDC25A, CDC25B	0.0182472
GOTERM_BP_FAT	GO:0040001~establishment of mitotic spindle localization	3	CENPA, NDC80, ESPL1	0.0180775
GOTERM_BP_FAT	GO:0044092~negative regulation of molecular function	10	PTHLH, MAD2L1, BUB1B, FBXO5, BIRC5, CDC20, GADD45B, UBE2C, GADD45A, UBE2E1	0.0191515
GOTERM_BP_FAT	GO:0010604~positive regulation of macromolecule metabolic process	17	E2F1, KLF6, RBM4, CDC20, UBE2C, CDK4, CDK2, CCNB1, CCNE1, CCND2, PLK1, PSMC3IP, FBXO5, MDM2, CCNA2, UBE2E1, SERTAD2	0.0201483
GOTERM_BP_FAT	GO:0009057~macromolecule catabolic process	16	SKP2, HERC5, CDC20, UBE2C, GTF2H2, RPA3, CCNB1, MAD2L1, DDB2, BUB1B, RAD18, MDM2, FBXO5, PSENEN, ERCC1, UBE2E1	0.0210131
GOTERM_BP_FAT	GO:0043086~negative regulation of catalytic activity	9	MAD2L1, BUB1B, FBXO5, BIRC5, CDC20, GADD45B, UBE2C, GADD45A, UBE2E1	0.0213937
GOTERM_BP_FAT	GO:0019220~regulation of phosphate metabolic process	12	CKS1B, CDC6, CCND2, HERC5, CKS2, CHEK1, CDKN3, CDC25C, GADD45B, GADD45A, CDC25A, CDC25B	0.0232095
GOTERM_BP_FAT	GO:0051174~regulation of phosphorus metabolic process	12	CKS1B, CDC6, CCND2, HERC5, CKS2, CHEK1, CDKN3, CDC25C, GADD45B, GADD45A, CDC25A, CDC25B	0.0232095
GOTERM_BP_FAT	GO:0051656~establishment of organelle localization	5	CENPA, TMED10, BIRC5, NDC80, ESPL1	0.0239874
GOTERM_BP_FAT	GO:0051653~spindle localization	3	CENPA, NDC80, ESPL1	0.0264732
GOTERM_BP_FAT	GO:0051293~establishment of spindle localization	3	CENPA, NDC80, ESPL1	0.0264732
GOTERM_BP_FAT	GO:0048145~regulation of fibroblast proliferation	4	TGIF1, CDK6, CDK4, CCNA2	0.0270806
GOTERM_BP_FAT	GO:0034621~cellular macromolecular complex subunit organization	10	HIST1H1C, CENPA, FBXO5, MCM2, SNRPC, TUBG1, ASF1B, CHAF1A, CHAF1B, HIST1H4J	0.0273064
GOTERM_BP_FAT	GO:0031400~negative regulation of protein modification process	6	MAD2L1, BUB1B, FBXO5, CDC20, UBE2C, UBE2E1	0.0280436
GOTERM_BP_FAT	GO:0031399~regulation of protein modification process	9	CCNB1, MAD2L1, CCND2, PLK1, BUB1B, FBXO5, CDC20, UBE2C, UBE2E1	0.0290875
GOTERM_BP_FAT	GO:0048477~oogenesis	4	CCNB1, FBXO5, ERCC1, CDC25B	0.0327906
GOTERM_BP_FAT	GO:0051053~negative regulation of DNA metabolic process	4	CDC6, HUS1, ERCC1, CDT1	0.0349178
GOTERM_BP_FAT	GO:0006511~ubiquitin-dependent protein catabolic process	8	CCNB1, MAD2L1, SKP2, BUB1B, MDM2, CDC20, UBE2C, UBE2E1	0.0353854
GOTERM_BP_FAT	GO:0031577~spindle checkpoint	3	MAD2L1, BUB1, BIRC5	0.0352261
GOTERM_BP_FAT	GO:0007143~female meiosis	3	PLK1, FBXO5, CDC25B	0.0352261
GOTERM_BP_FAT	GO:0006613~cotranslational protein targeting to membrane	3	SRPR, TRAM1, SSR3	0.0352261
GOTERM_BP_FAT	GO:0043085~positive regulation of catalytic activity	12	CCNB1, PTHLH, VDR, CCND2, PLK1, FBXO5, CDC20, PSENEN, GADD45B, UBE2C, CDC25B, UBE2E1	0.0349543
GOTERM_CC_FAT	GO:0030894~replisome	3	POLA2, MCM3, RPA3	0.0293575
GOTERM_CC_FAT	GO:0043601~nuclear replisome	3	POLA2, MCM3, RPA3	0.0293575
GOTERM_BP_FAT	GO:0051603~proteolysis involved in cellular protein catabolic process	13	SKP2, HERC5, CDC20, UBE2C, CCNB1, MAD2L1, DDB2, FBXO5, MDM2, RAD18, BUB1B, PSENEN, UBE2E1	0.0363561
GOTERM_BP_FAT	GO:0044257~cellular protein catabolic process	13	SKP2, HERC5, CDC20, UBE2C, CCNB1, MAD2L1, DDB2, FBXO5, MDM2, RAD18, BUB1B, PSENEN, UBE2E1	0.037433
GOTERM_BP_FAT	GO:0000910~cytokinesis	4	PLK1, BIRC5, ESPL1, AURKB	0.037891
GOTERM_BP_FAT	GO:0031401~positive regulation of protein modification process	7	CCNB1, CCND2, PLK1, FBXO5, CDC20, UBE2C, UBE2E1	0.038172
GOTERM_BP_FAT	GO:0001556~oocyte maturation	3	CCNB1, FBXO5, CDC25B	0.0390195
GOTERM_CC_FAT	GO:0043596~nuclear replication fork	3	POLA2, MCM3, RPA3	0.0325823
GOTERM_CC_FAT	GO:0000794~condensed nuclear chromosome	4	NEK2, BUB1, CHEK1, TUBG1	0.0332188
GOTERM_BP_FAT	GO:0006268~DNA unwinding during replication	3	MCM2, MCM4, MCM6	0.0447399
GOTERM_BP_FAT	GO:0030163~protein catabolic process	13	SKP2, HERC5, CDC20, UBE2C, CCNB1, MAD2L1, DDB2, FBXO5, MDM2, RAD18, BUB1B, PSENEN, UBE2E1	0.0453442
GOTERM_BP_FAT	GO:0032268~regulation of cellular protein metabolic process	11	CCNB1, MAD2L1, CCND2, PLK1, BUB1B, MDM2, FBXO5, CDC20, CDK4, UBE2C, UBE2E1	0.0489042
GOTERM_BP_FAT	GO:0003006~reproductive developmental process	8	CCNB1, CCNE1, VDR, CCND2, FBXO5, CSDA, ERCC1, CDC25B	0.0485317
GOTERM_MF_FAT	GO:0003682~chromatin binding	6	CDC6, BAZ1B, CENPA, TGIF1, CHAF1A, CHAF1B	0.0891304
GOTERM_MF_FAT	GO:0003684~damaged DNA binding	4	POLH, DDB2, RAD18, ERCC1	0.0882378
GOTERM_CC_FAT	GO:0030496~midbody	3	NEK2, BIRC5, AURKB	0.043763
GOTERM_BP_FAT	GO:0000077~DNA damage checkpoint	4	HUS1, CHEK1, CHEK2, CCNA2	0.0548251
GOTERM_BP_FAT	GO:0048609~reproductive process in a multicellular organism	11	CCNB1, PTHLH, CCNE1, CCND2, FBXO5, CHEK1, PTTG1, ASF1B, CSDA, ERCC1, CDC25B	0.0569317
GOTERM_BP_FAT	GO:0032504~multicellular organism reproduction	11	CCNB1, PTHLH, CCNE1, CCND2, FBXO5, CHEK1, PTTG1, ASF1B, CSDA, ERCC1, CDC25B	0.0569317
GOTERM_BP_FAT	GO:0043632~modification-dependent macromolecule catabolic process	12	CCNB1, MAD2L1, HERC5, SKP2, DDB2, BUB1B, RAD18, MDM2, FBXO5, CDC20, UBE2C, UBE2E1	0.0633596
GOTERM_BP_FAT	GO:0019941~modification-dependent protein catabolic process	12	CCNB1, MAD2L1, HERC5, SKP2, DDB2, BUB1B, RAD18, MDM2, FBXO5, CDC20, UBE2C, UBE2E1	0.0633596
GOTERM_BP_FAT	GO:0032392~DNA geometric change	3	MCM2, MCM4, MCM6	0.0683901
GOTERM_BP_FAT	GO:0032508~DNA duplex unwinding	3	MCM2, MCM4, MCM6	0.0683901
GOTERM_BP_FAT	GO:0044093~positive regulation of molecular function	12	CCNB1, PTHLH, VDR, CCND2, PLK1, FBXO5, CDC20, PSENEN, GADD45B, UBE2C, CDC25B, UBE2E1	0.0717559
GOTERM_BP_FAT	GO:0032355~response to estradiol stimulus	4	CCNE1, CCND2, AURKA, CCNA2	0.0720244
GOTERM_BP_FAT	GO:0007098~centrosome cycle	3	KIF11, NEK2, GADD45A	0.0739096
GOTERM_BP_FAT	GO:0045787~positive regulation of cell cycle	4	CCND2, MDM2, BIRC5, ESPL1	0.0816788
GOTERM_BP_FAT	GO:0048599~oocyte development	3	CCNB1, FBXO5, CDC25B	0.0877339
GOTERM_BP_FAT	GO:0006308~DNA catabolic process	4	DDB2, ERCC1, GTF2H2, RPA3	0.0918371
GOTERM_BP_FAT	GO:0030071~regulation of mitotic metaphase/anaphase transition	3	MAD2L1, BUB1, ESPL1	0.0941404
GOTERM_BP_FAT	GO:0009994~oocyte differentiation	3	CCNB1, FBXO5, CDC25B	0.0941404
GOTERM_BP_FAT	GO:0042127~regulation of cell proliferation	14	CDC6, FOXM1, CDK6, CHEK1, CDKN3, CDK4, CDK2, CDC25B, PTHLH, VDR, CCND2, MDM2, TGIF1, CCNA2	0.0964119
