# Supplementary material for: Inference of Low and High-Grade Glioma Gene Regulatory Networks Delineates the Role of Rnd3 in Establishing Multiple Hallmarks of Cancer
Source: PLoS Genet. 2015 Jul 1;11(7):e1005325. doi: 10.1371/journal.pgen.1005325 (PMC4488580; doi:10.1371/journal.pgen.1005325)
Supplement: S2 Dataset — Rho GTPase connectivity was assessed in multiple ARACNE networks at different significance levels for gene-gene connections (p-values < 1e-5 or 1e-6). The same threshold used for the original data was used for defining Rho GTPases with strong grade specific connectivity (the proportion of grade II connections / proportion grade IV connections > 0.4 or < -0.4). (XLSX) [file pgen.1005325.s002.xlsx]

## Sheet: Sheet3
RhoGTPase gene connectivity (degree) in networks derived from the Cancer Genome Atlas glioma grade II and IV datasets
Rho GTPase connectivity was assessed in multiple networks at different significance levels for gene-gene connections (p-values 1e-5 or 1e-6). The same threshold used for the original data was used for defining Rho GTPases with strong grade specific connectivity (the proportion of grade II connections / proportion grade IV connections > 0.4 or < -0.4).
Connectivity Bias
Strong Grade IV
Grade IV
Grade II
Strong Grade II
	Rho GTPase connectivity Grade 2 Glioma				Rho GTPase connectivity Grade 4 Glioma
	p-value 1e-5		p-value 1e-6		p-value 1e-5		p-value 1e-6		proportion G2 / proportion G4
Gene	#G2	#G2/sum G2	#G2	#G2/sum G2	#G4	#G4/sum G4	#G4	#G4/sum G4	propG2/propG4 (1e-5)	propG2/propG4 (1e-6)	Connectivity Sun et al	Connectivity TCGA	Trend Conserved
RND3	6	0.000494845	0	0	159	0.00675188	47	0.00303657	0.863429	1	Strong Grade IV	Strong Grade IV	Yes
RAC3	505	0.0416495	183	0.0283238	2750	0.116778	1758	0.113581	0.474213	0.600805	Strong Grade IV	Strong Grade IV	Yes
RHOC	977	0.0805773	432	0.0668627	3546	0.15058	2464	0.159194	0.302835	0.408442	Strong Grade IV	Strong Grade IV	Yes
RAC2	1056	0.0870928	728	0.112676	2164	0.0918935	1540	0.0994961	0.0268217	-0.0621194	Strong Grade IV	Non-Specific	No
RND1	1050	0.0865979	454	0.0702678	653	0.0277294	295	0.0190593	-0.514912	-0.573269	Strong Grade IV	Strong Grade II	No
CDC42	104	0.00857732	24	0.0037146	4197	0.178224	3276	0.211655	0.908166	0.965505	Grade IV	Strong Grade IV	Yes
RHOBTB1	58	0.00478351	9	0.00139297	304	0.0129093	107	0.00691304	0.45927	0.664587	Grade IV	Strong Grade IV	Yes
RHOG	1193	0.0983918	651	0.100758	3819	0.162172	2809	0.181483	0.244779	0.286014	Grade IV	Grade IV	Yes
RHOH	747	0.0616082	461	0.0713512	2251	0.0955879	1533	0.0990438	0.216161	0.16252	Grade II	Grade IV	No
RHOBTB2	1922	0.158515	1245	0.192695	1611	0.0684105	800	0.0516863	-0.397067	-0.577002	Grade II	Strong Grade II	Yes
RHOD	1825	0.150515	930	0.143941	995	0.0422523	494	0.0319163	-0.561625	-0.63702	Grade II	Strong Grade II	Yes
RND2	182	0.0150103	52	0.00804829	328	0.0139284	100	0.00646078	-0.0373861	-0.109415	Strong Grade II	Grade II	Yes
RHOB	54	0.00445361	21	0.00325027	55	0.00233556	25	0.0016152	-0.311975	-0.336057	Strong Grade II	Grade II	Yes
RHOQ	464	0.038268	139	0.0215137	448	0.0190242	163	0.0105311	-0.33589	-0.342727	Strong Grade II	Grade II	Yes
RHOBTB3	466	0.038433	190	0.0294072	166	0.00704913	48	0.00310118	-0.690026	-0.809208	Strong Grade II	Strong Grade II	Yes
RHOF	1516	0.125031	942	0.145798	103	0.00437386	19	0.00122755	-0.9324	-0.983302	Strong Grade II	Strong Grade II	Yes
Sum	12125	1	6461	1	23549	1	15478	1
